# Supplementary material for: Localized Hypermutation is the Major Driver of Meningococcal Genetic Variability during Persistent Asymptomatic Carriage
Source: PubMed Central journal article supplement (PMC7157529; doi:10.1128/mbio.03068-19), 2020-03-24
Supplement: mBio.03068-19-sd001.pdf [file mBio.03068-19-sd001.pdf]

This file contains five tables (I-V) listing the phase variation and Gene Scan data for all isolates for pilin modulation, pilin glycosylation, restriction-modification and Opa modules of phase-variable genes. The following information is listed for every gene for each isolate; size of PCR product as determined by GeneScan; derived repeat number (as determined from GeneScan relative to a product of known repeat number); derived expression state (as determined from a bioinformatic analysis of the open reading frame or relative to other isolates of known expression state). Two additional items of information are provided for the Opa genes; size of G tract and size of A tract (these two tracts are adjacent to the repetitive sequence and their length influences the expression state)

Supplementary Data Table I. Repeat numbers and expression states for pilin modulation and LOS phase-variable genes

| Volunteer<br>/time pt | Isolate | Phase Variable Gene |                    |                            |                   |                    |                            |                           |                    |                            |                   |                    |                            |
|-----------------------|---------|---------------------|--------------------|----------------------------|-------------------|--------------------|----------------------------|---------------------------|--------------------|----------------------------|-------------------|--------------------|----------------------------|
|                       |         | <i>lgtG</i>         |                    |                            | <i>NMB1255</i>    |                    |                            | <i>pilC1</i> <sup>4</sup> |                    |                            | <i>pilC2</i>      |                    |                            |
|                       |         | Size <sup>1</sup>   | Tract <sup>2</sup> | Exp.<br>State <sup>3</sup> | Size <sup>1</sup> | Tract <sup>2</sup> | Exp.<br>State <sup>3</sup> | Size <sup>1</sup>         | Tract <sup>2</sup> | Exp.<br>State <sup>3</sup> | Size <sup>1</sup> | Tract <sup>2</sup> | Exp.<br>State <sup>3</sup> |
| <b>cc174</b>          |         |                     |                    |                            |                   |                    |                            |                           |                    |                            |                   |                    |                            |
| V43/1 <sup>st</sup>   | N43.1.1 | 372.1               | 12C*               | 0                          | 377.0             | 10G                | 1                          | 256.5                     | 14G                | 0                          | 353.7             | 13G                | 1                          |
|                       | N43.1.2 | 372.0               | 12C                | 0                          | 377.2             | 10G                | 1                          | 256.4>255.5<br>{1.2}      | 14G                | 0                          | 353.5             | 13G                | 1                          |
|                       | N43.1.3 | 372.2               | 12C                | 0                          | 377.0             | 10G                | 1                          | 256.4                     | 14G                | 0                          | 353.6             | 13G                | 1                          |
|                       | N43.1.4 | 372.0               | 12C                | 0                          | 376.8             | 10G                | 1                          | 256.3                     | 14G                | 0                          | 353.3             | 13G                | 1                          |
|                       | N43.1.5 | 371.9               | 12C                | 0                          | 376.8             | 10G                | 1                          | 256.3                     | 14G                | 0                          | 353.4             | 13G                | 1                          |
|                       | N43.1.6 | 372.1               | 12C                | 0                          | 377.1             | 10G                | 1                          | 256.3                     | 14G                | 0                          | 353.3             | 13G                | 1                          |
| V43/2 <sup>nd</sup>   | N241.1  | 369.9               | 10C                | 0                          | 376.0             | 9G                 | 0                          | 255.9<br>(380.4)          | 10G*<br>(13G)      | 0                          | 355.1             | 13G*               | 1                          |
|                       | N241.2  | 370.1               | 10C                | 0                          | 375.9             | 9G                 | 0                          | 255.9<br>(381.4)          | 10G<br>(14G)       | 1                          | 355.2             | 13G                | 1                          |
| V43/3 <sup>rd</sup>   | N349.1  | 369.9               | 10C                | 0                          | 375.9             | 9G                 | 0                          | 255.9<br>(380.4)          | 10G*<br>(13G)      | 0                          | 355.2             | 13G*               | 1                          |
|                       | N349.2  | 370.2               | 10C                | 0                          | 375.9             | 9G*                | 0                          | 255.9<br>(380.5)          | 10G<br>(13G)       | 0                          | 355.1             | 13G                | 1                          |
|                       | N349.3  | 370.0               | 10C                | 0                          | 375.7             | 9G                 | 0                          | 256.0<br>(380.4)          | 10G<br>(13G)       | 0                          | 355.1             | 13G                | 1                          |
|                       | N349.4  | 370.1               | 10C                | 0                          | 376.0             | 9G                 | 0                          | 256.1<br>(379.5)          | 10G<br>(12G)       | 0                          | 355.1             | 13G                | 1                          |
|                       | N349.5  | 370.3               | 10C                | 0                          | 376.0             | 9G                 | 0                          | 255.9<br>(380.4)          | 10G<br>(13G)       | 0                          | 355.1             | 13G                | 1                          |
|                       | N349.6  | 370.2               | 10C                | 0                          | 376.0             | 9G                 | 0                          | 256.2<br>(380.4)          | 10G<br>(13G)       | 0                          | 355.1             | 13G                | 1                          |
| V43/4 <sup>th</sup>   | Cleared |                     |                    |                            |                   |                    |                            |                           |                    |                            |                   |                    |                            |
| V51/1 <sup>st</sup>   | N51.1   | 370.0               | 10C                | 0                          | 375.9             | 9G                 | 0                          | 256.1<br>(380.5)          | 10G*<br>(13G)      | 0                          | 356.0             | 14G*               | 0                          |
|                       | N51.2   | 370.1               | 10C                | 0                          | 376.0             | 9G                 | 0                          | 256.3<br>(380.5)          | 10G<br>(13G)       | 0                          | 354.9             | 13G                | 1                          |
|                       | N51.3   | 369.8               | 10C                | 0                          | 376.1             | 9G                 | 0                          | 256.3<br>(380.8)          | 10G<br>(13G*)      | 0                          | 355.9             | 14G                | 0                          |

|                     |        |       |     |   |        |    |   |                  |               |   |            |      |   |
|---------------------|--------|-------|-----|---|--------|----|---|------------------|---------------|---|------------|------|---|
|                     | N51.4  | 370.1 | 10C | 0 | 376.2  | 9G | 0 | 256.3<br>(380.6) | 10G<br>(13G)  | 0 | 355.9      | 14G  | 0 |
|                     | N51.5  | 369.9 | 10C | 0 | 376.0  | 9G | 0 | 256.3<br>(380.5) | 10G<br>(13G*) | 0 | 355.9      | 14G  | 0 |
|                     | N51.6  | 370.2 | 10C | 0 | 376.0  | 9G | 0 | 256.3<br>(380.5) | 10G<br>(13G)  | 0 | 355.8      | 14G  | 0 |
| V51/2 <sup>nd</sup> | N236.1 | 369.9 | 10C | 0 | 375.9  | 9G | 0 | 256.5<br>(380.6) | 10G*<br>(13G) | 0 | 354.8      | 13G* | 1 |
|                     | N236.2 | 370.2 | 10C | 0 | 376.0  | 9G | 0 | 255.9<br>(380.6) | 10G<br>(13G)  | 0 | 355.0      | 13G  | 1 |
|                     | N236.3 | 369.9 | 10C | 0 | 375.8  | 9G | 0 | 256.3<br>(380.5) | 10G*<br>(13G) | 0 | 355.0      | 13G  | 1 |
|                     | N236.4 | 370.2 | 10C | 0 | 376.0  | 9G | 0 | 256.3<br>(380.6) | 10G<br>(13G)  | 0 | 356.0      | 14G  | 0 |
|                     | N236.5 | 370.2 | 10C | 0 | 376.1  | 9G | 0 | 256.4<br>(380.5) | 10G<br>(13G)  | 0 | 355.9      | 14G  | 0 |
|                     | N236.6 | 370.2 | 10C | 0 | 376.4  | 9G | 0 | 256.4<br>(380.5) | 10G<br>(13G)  | 0 | 355.0      | 13G  | 1 |
| V51/3 <sup>rd</sup> | N354.1 | 370.1 | 10C | 0 | 376.1  | 9G | 0 | 256.4<br>(380.5) | 10G<br>(13G)  | 0 | 355.8      | 14G  | 0 |
|                     | N354.2 | 370.2 | 10C | 0 | 375.6* | 9G | 0 | 256.0<br>(380.3) | 10G<br>(13G)  | 0 | 355.2      | 13G  | 1 |
|                     | N354.3 | 370.2 | 10C | 0 | 375.9  | 9G | 0 | 255.9<br>(380.4) | 10G<br>(13G*) | 0 | 354.9      | 13G  | 1 |
|                     | N354.4 | 370.1 | 10C | 0 | 376.3  | 9G | 0 | 256.4<br>(380.6) | 10G<br>(13G)  | 0 | 354.9      | 13G  | 1 |
|                     | N354.5 | 370.0 | 10C | 0 | 376.1  | 9G | 0 | 256.0<br>(380.5) | 10G<br>(13G)  | 0 | 355.2      | 13G  | 1 |
|                     | N354.6 | 370.1 | 10C | 0 | 376.3  | 9G | 0 | 256.4<br>(380.5) | 10G<br>(13G)  | 0 | 355.0      | 13G  | 1 |
| V51/4 <sup>th</sup> | N424.1 | 370.0 | 10C | 0 | 375.9  | 9G | 0 | 252.7<br>(379.6) | 10G<br>(12G)  | 0 | 353.4      | 13G  | 1 |
|                     | N424.2 | 370.2 | 10C | 0 | 376.1  | 9G | 0 | 255.9<br>(379.6) | 10G<br>(12G)  | 0 | 355.2 (13) | 13G  | 1 |
|                     | N424.3 | 370.1 | 10C | 0 | 375.9  | 9G | 0 | 256.4<br>(379.6) | 10G<br>(12G)  | 0 | 354.9 (13) | 13G  | 1 |
|                     | N424.4 | 370.1 | 10C | 0 | 375.9  | 9G | 0 | 256.1<br>(379.6) | 10G<br>(12G)  | 0 | 355.1 (13) | 13G  | 1 |

|                     |         |       |      |   |       |     |   |                              |               |   |            |      |   |
|---------------------|---------|-------|------|---|-------|-----|---|------------------------------|---------------|---|------------|------|---|
|                     | N424.5  | 370.1 | 10C  | 0 | 375.8 | 9G  | 0 | 256.5<br>(379.6)             | 10G*<br>(12G) | 0 | 354.9 (13) | 13G  | 1 |
|                     | N424.6  | 370.1 | 10C  | 0 | 376.1 | 9G  | 0 | 256.1<br>(379.6)             | 10G<br>(12G)  | 0 | 355.1 (13) | 13G  | 1 |
|                     |         |       |      |   |       |     |   |                              |               |   |            |      |   |
| V52/1 <sup>st</sup> | N52.1   | 370.6 | 10C* | 0 | 376.0 | 9G  | 0 | 256.2<br>(380.6)             | 10G<br>(13G)  | 0 | 356.0      | 14G* | 0 |
|                     | N52.2   | 370.1 | 10C  | 0 | 376.1 | 9G  | 0 | 256.0<br>(380.6)             | 10G<br>(13G)  | 0 | 356.0      | 14G  | 0 |
|                     | N52.3   | 370.4 | 10C  | 0 | 376.1 | 9G  | 0 | 255.9<br>(380.6)             | 10G<br>(13G)  | 0 | 356.0      | 14G  | 0 |
|                     | N52.4   | 370.1 | 10C  | 0 | 376.3 | 9G  | 0 | 256.0<br>(380.8)             | 10G<br>(13G)  | 0 | 356.1      | 14G  | 0 |
|                     | N52.5   | 370.2 | 10C  | 0 | 376.1 | 9G  | 0 | 255.9<br>(380.7)             | 10G<br>(13G)  | 0 | 356.1      | 14G  | 0 |
|                     | N52.6   | 370.1 | 10C  | 0 | 376.2 | 9G  | 0 | 256.0<br>(380.7)             | 10G<br>(13G)  | 0 | 356.1      | 14G  | 0 |
| V52/2 <sup>nd</sup> | N238.1  | 370.0 | 10C  | 0 | 375.9 | 9G  | 0 | 256.0<br>(380.4)             | 10G<br>(13G)  | 0 | 355.2      | 13G* | 1 |
|                     | N238.2  | 370.6 | 10C  | 0 | 376.0 | 9G  | 0 | 255.9<br>(380.4)             | 10G*<br>(13G) | 0 | 355.2      | 13G  | 1 |
|                     | N238.3  | 370.0 | 10C  | 0 | 375.8 | 9G  | 0 | 255.9<br>(380.4)             | 10G<br>(13G)  | 0 | 356.2      | 14G  | 0 |
|                     | N238.4  | 370.1 | 10C  | 0 | 376.2 | 9G  | 0 | 255.9<br>(380.5)             | 10G<br>(13G)  | 0 | 355.2      | 13G  | 1 |
|                     | N238.5  | 370.2 | 10C  | 0 | 376.0 | 9G  | 0 | 252.8<br>(380.4)             | 10G<br>(13G)  | 0 | 353.3      | 13G  | 1 |
|                     | N238.6  | 369.7 | 10C  | 0 | 376.2 | 9G  | 0 | 255.9<br>(380.6)             | 10G<br>(13G)  | 0 | 356.1      | 14G  | 0 |
| V52/3 <sup>rd</sup> | N342.1  | 370.2 | 10C  | 0 | 375.9 | 9G  | 0 | 256.1<br>(380.6)             | 10G<br>(13G*) | 0 | 355.1      | 13G  | 1 |
| V52/4 <sup>th</sup> | Cleared |       |      |   |       |     |   |                              |               |   |            |      |   |
|                     |         |       |      |   |       |     |   |                              |               |   |            |      |   |
| V54/1 <sup>st</sup> | N54.1.1 | 371.1 | 11C  | 1 | 378.2 | 11G | 0 | 257.8<br>(374.5)             | 12G<br>(11G)  | 0 | 352.3      | 10G  | 1 |
|                     | N54.1.2 | 370.1 | 10C  | 0 | 377.1 | 10G | 1 | 257.8>256.9<br>{1.1} (375.0) | 12G<br>(12G)  | 0 | 352.3      | 10G  | 1 |
|                     | N54.1.3 | 371.0 | 11C  | 1 | 377.2 | 10G | 1 | 256.8>257.7                  | 11G           | 0 | 352.3      | 10G  | 1 |

|                     |          |       |      |   |       |      |   |                            |               |   |       |      |   |
|---------------------|----------|-------|------|---|-------|------|---|----------------------------|---------------|---|-------|------|---|
|                     |          |       |      |   |       |      |   | {1.2} (375.5)              | (12G)         |   |       |      |   |
|                     | N54.1.4  | 371.1 | 11C  | 1 | 377.0 | 10G  | 1 | 257.8>256.9<br>{1} (375.6) | 12G<br>(12G)  | 0 | 352.3 | 10G  | 1 |
|                     | N54.1.5  | 371.0 | 11C  | 1 | 377.2 | 10G  | 1 | 257.8<br>(375.6)           | 12G<br>(12G)  | 0 | 352.2 | 10G  | 1 |
|                     | N54.1.6  | 370.9 | 11C  | 1 | 377.1 | 10G  | 1 | 254.4>253.5<br>{1} (375.5) | 12G<br>(12G)  | 0 | 350.4 | 10G* | 1 |
| V54/2 <sup>nd</sup> | N237.1   | 370.1 | 10C  | 0 | 378.2 | 11G* | 0 | 254.3<br>(374.5)           | 12G<br>(11G)  | 0 | 350.3 | 10G  | 1 |
|                     | N237.2   | 371.0 | 11C* | 1 | 378.0 | 11G  | 0 | 255.6<br>(374.6)           | 13G<br>(11G)  | 1 | 350.4 | 10G  | 1 |
|                     | N237.3   | 370.0 | 10C  | 0 | 378.1 | 11G  | 0 | 257.8<br>(374.5)           | 12G<br>(11G)  | 0 | 352.3 | 10G  | 1 |
|                     | N237.4   | 371.0 | 11C  | 1 | 378.0 | 11G  | 0 | 258.8<br>(374.6)           | 13G<br>(11G)  | 1 | 352.3 | 10G  | 1 |
|                     | N237.5   | 371.0 | 11C  | 1 | 377.1 | 10G  | 1 | 254.3<br>(374.5)           | 12G<br>(11G)  | 0 | 350.3 | 10G  | 1 |
|                     | N237.6   | 371.1 | 11C  | 1 | 377.0 | 10G* | 1 | 254.3<br>(373.6)           | 12G<br>(10G)  | 0 | 350.4 | 10G  | 1 |
| V54/3 <sup>rd</sup> | N343.1   | 371.3 | 11C  | 1 | 379.1 | 12G  | 0 | 258.8<br>(375.5)           | 13G<br>(12G)  | 1 | 352.2 | 10G  | 1 |
|                     | N343.2   | 371.1 | 11C  | 1 | 378.1 | 11G  | 0 | 257.7<br>(375.6)           | 12G<br>(12G)  | 0 | 352.3 | 10G  | 1 |
|                     | N343.3   | 371.1 | 11C  | 1 | 378.3 | 11G  | 0 | 257.6<br>(375.5)           | 12G<br>(12G)  | 0 | 352.4 | 10G  | 1 |
|                     | N343.4   | 371.0 | 11C  | 1 | 379.2 | 12G* | 0 | 255.5<br>(375.4)           | 13G<br>(12G)  | 0 | 350.3 | 10G  | 1 |
|                     | N343.5   | 370.1 | 10C  | 0 | 379.2 | 12G  | 0 | 255.4<br>(375.5)           | 13G<br>(12G)  | 0 | 350.4 | 10G  | 1 |
|                     | N343.6   | 371.0 | 11C  | 1 | 379.3 | 12G  | 0 | 255.4<br>(375.3)           | 13G<br>(12G*) | 0 | 350.1 | 10G  | 1 |
| V54/4 <sup>th</sup> | Replaced |       |      |   |       |      |   |                            |               |   |       |      |   |
| V58/1 <sup>st</sup> | N58.1    | 370.1 | 10C  | 0 | 376.2 | 9G   | 0 | 256.0<br>(380.7)           | 10G*<br>(13G) | 0 | 355.9 | 14G* | 0 |
|                     | N58.2    | 368.0 | 8C*  | 1 | 376.0 | 9G   | 0 | 256.1<br>(380.7)           | 10G<br>(13G)  | 0 | 356.1 | 14G  | 0 |
|                     | N58.3    | 370.0 | 10C  | 0 | 376.0 | 9G   | 0 | 256.0                      | 10G           | 0 | 356.0 | 14G  | 0 |

|                     |         |       |     |   |       |    |   |                  |               |    |                    |      |   |
|---------------------|---------|-------|-----|---|-------|----|---|------------------|---------------|----|--------------------|------|---|
|                     |         |       |     |   |       |    |   | (380.6)          | (13G)         |    |                    |      |   |
|                     | N58.4   | 370.1 | 10C | 0 | 376.1 | 9G | 0 | 255.9<br>(379.6) | 10G<br>(12G)  | 0  | 356.0              | 14G  | 0 |
|                     | N58.5   | 370.3 | 10C | 0 | 376.0 | 9G | 0 | 256.0<br>(380.7) | 10G<br>(13G)  | 0  | 356.0              | 14G  | 0 |
|                     | N58.6   | 370.2 | 10C | 0 | 376.3 | 9G | 0 | 255.9<br>(ND)    | 10G<br>(13G)  | ND | 355.1>354.2<br>{1} | 13G  | 1 |
| V58/2 <sup>nd</sup> | N240.1  | 370.1 | 10C | 0 | 375.9 | 9G | 0 | 252.5<br>(380.4) | 10G<br>(13G)  | 0  | 354.4              | 14G  | 0 |
|                     | N240.2  | 370.2 | 10C | 0 | 375.8 | 9G | 0 | 252.5<br>(380.4) | 10G<br>(13G)  | 0  | 353.1              | 13G  | 1 |
| V58/3 <sup>rd</sup> | Cleared |       |     |   |       |    |   |                  |               |    |                    |      |   |
| V58/4 <sup>th</sup> | N429.1  | 370.2 | 10C | 0 | 376.0 | 9G | 0 | 256.0<br>(379.6) | 10G*<br>(12G) | 0  | 355.1              | 13G* | 1 |
|                     | N429.2  | 370.1 | 10C | 0 | 376.1 | 9G | 0 | 256.0<br>(379.6) | 10G<br>(12G)  | 0  | 355.1              | 13G  | 1 |
|                     | N429.3  | 370.1 | 10C | 0 | 375.6 | 9G | 0 | 256.0<br>(380.5) | 10G<br>(13G)  | 0  | 355.1              | 13G  | 1 |
|                     | N429.4  | 370.1 | 10C | 0 | 375.7 | 9G | 0 | 256.1<br>(380.3) | 10G<br>(13G)  | 0  | 355.0              | 13G  | 1 |
|                     | N429.5  | 370.2 | 10C | 0 | 376.1 | 9G | 0 | 256.0<br>(379.6) | 10G<br>(12G)  | 0  | 353.4              | 13G* | 1 |
|                     | N429.6  | 370.1 | 10C | 0 | 376.0 | 9G | 0 | 256.1<br>(380.5) | 10G<br>(13G)  | 0  | 355.1              | 13G  | 1 |
|                     |         |       |     |   |       |    |   |                  |               |    |                    |      |   |
| V59/1 <sup>st</sup> | N59.1.1 | 370.1 | 10C | 0 | 376.1 | 9G | 0 | 256.4<br>(380.4) | 10G*<br>(13G) | 0  | 355.0              | 13G* | 1 |
|                     | N59.1.2 | 370.1 | 10C | 0 | 375.9 | 9G | 0 | 255.8<br>(379.4) | 10G<br>(12G)  | 0  | 355.0              | 13G  | 1 |
|                     | N59.1.3 | 370.2 | 10C | 0 | 376.2 | 9G | 0 | 256.3<br>(380.8) | 10G<br>(13G)  | 0  | 355.9              | 14G  | 0 |
|                     | N59.1.4 | 370.1 | 10C | 0 | 375.4 | 8G | 0 | 256.3<br>(379.6) | 10G<br>(12G)  | 0  | 354.9              | 13G  | 1 |
|                     | N59.1.5 | 370.0 | 10C | 0 | 376.1 | 9G | 0 | 256.0<br>(379.6) | 10G<br>(12G)  | 0  | 355.2              | 13G  | 1 |
|                     | N59.1.6 | 370.3 | 10C | 0 | 376.0 | 9G | 0 | 256.6<br>(379.7) | 10G*<br>(12G) | 0  | 354.9              | 13G  | 1 |
| V59/2 <sup>nd</sup> | N253.1  | 370.0 | 10C | 0 | 376.0 | 9G | 0 | 256.2            | 10G*          | 0  | 355.0              | 13G* | 1 |

|                     |         |       |     |   |       |     |   |                  |               |   |       |     |   |
|---------------------|---------|-------|-----|---|-------|-----|---|------------------|---------------|---|-------|-----|---|
|                     |         |       |     |   |       |     |   | (379.4)          | (12G)         |   |       |     |   |
|                     | N253.2  | 370.2 | 10C | 0 | 376.1 | 9G  | 0 | 256.3<br>(379.4) | 10G<br>(12G)  | 0 | 355.0 | 13G | 1 |
|                     | N253.3  | 370.1 | 10C | 0 | 375.9 | 9G  | 0 | 256.2<br>(379.7) | 10G*<br>(12G) | 0 | 355.0 | 13G | 1 |
|                     | N253.4  | 370.2 | 10C | 0 | 375.9 | 9G  | 0 | 256.3<br>(380.4) | 10G<br>(13G)  | 0 | 355.0 | 13G | 1 |
|                     | N253.5  | 370.0 | 10C | 0 | 375.7 | 9G  | 0 | 256.3<br>(379.7) | 10G<br>(12G)  | 0 | 354.9 | 13G | 1 |
|                     | N253.6  | 370.1 | 10C | 0 | 376.0 | 9G  | 0 | 256.5<br>(379.4) | 10G<br>(12G)  | 0 | 354.9 | 13G | 1 |
| V59/3 <sup>rd</sup> | N352.1  | 370.2 | 10C | 0 | 375.6 | 9G  | 0 | 256.3<br>(380.5) | 10G<br>(13G)  | 0 | 355.0 | 13G | 1 |
|                     | N352.2  | 371.0 | 11C | 1 | 376.0 | 9G  | 0 | 256.2<br>(380.6) | 10G<br>(13G)  | 0 | 355.0 | 13G | 1 |
|                     | N352.3  | 370.1 | 10C | 0 | 375.7 | 9G  | 0 | 256.0<br>(380.6) | 10G<br>(13G)  | 0 | 355.1 | 13G | 1 |
|                     | N352.4  | 370.0 | 10C | 0 | 376.0 | 9G  | 0 | 256.2<br>(379.6) | 10G<br>(12G)  | 0 | 355.0 | 13G | 1 |
|                     | N352.5  | 370.1 | 10C | 0 | 376.6 | 10G | 1 | 256.3<br>(380.5) | 10G<br>(13G)  | 0 | 354.9 | 13G | 1 |
|                     | N352.6  | 370.1 | 10C | 0 | 375.8 | 9G  | 0 | 256.1<br>(379.4) | 10G<br>(12G)  | 0 | 355.0 | 13G | 1 |
| V59/4 <sup>th</sup> | N438.1  | 370.0 | 10C | 0 | 375.9 | 9G  | 0 | 256.4<br>(380.4) | 10G<br>(13G*) | 0 | 355.0 | 13G | 1 |
|                     | N438.2  | 370.1 | 10C | 0 | 376.1 | 9G  | 0 | 256.3<br>(380.4) | 10G<br>(13G)  | 0 | 355.0 | 13G | 1 |
|                     | N438.3  | 370.2 | 10C | 0 | 375.7 | 9G  | 0 | 256.3<br>(380.5) | 10G*<br>(13G) | 0 | 354.0 | 12G | 0 |
|                     | N438.4  | 370.1 | 10C | 0 | 376.0 | 9G  | 0 | 256.3<br>(380.5) | 10G<br>(13G)  | 0 | 354.9 | 13G | 1 |
|                     | N438.5  | 370.1 | 10C | 0 | 375.7 | 9G  | 0 | 256.4<br>(380.6) | 10G<br>(13G)  | 0 | 355.1 | 13G | 1 |
|                     | N438.6  | 370.2 | 10C | 0 |       |     |   | 256.4<br>(380.4) | 10G<br>(13G)  | 0 | 354.9 | 13G | 1 |
|                     |         |       |     |   |       |     |   |                  |               |   |       |     |   |
| V88/1 <sup>st</sup> | N88.1.1 | 372.1 | 12C | 0 | 376.7 | 10G | 1 | 259.5            | 13G           | 1 | 351.4 | 9G* | 0 |
|                     | N88.1.2 | 372.0 | 12C | 0 | 377.0 | 10G | 1 | 259.4            | 13G           | 1 | 351.4 | 9G  | 0 |

|                      |         |       |     |   |       |     |   |                      |               |   |       |      |   |
|----------------------|---------|-------|-----|---|-------|-----|---|----------------------|---------------|---|-------|------|---|
|                      | N88.1.3 | 372.0 | 12C | 0 | 376.7 | 10G | 1 | 259.6                | 13G           | 1 | 351.4 | 9G   | 0 |
|                      | N88.1.4 | 372.0 | 12C | 0 | 377.0 | 10G | 1 | 259.5                | 13G           | 1 | 351.4 | 9G   | 0 |
|                      | N88.1.5 | 372.0 | 12C | 0 | 376.7 | 10G | 1 | 258.7                | 12G           | 0 | 351.3 | 9G   | 0 |
|                      | N88.1.6 | 371.9 | 12C | 0 | 376.8 | 10G | 1 | 259.7                | 13G           | 1 | 351.3 | 9G   | 0 |
| V88/2 <sup>nd</sup>  | N272.1  | 371.9 | 12C | 0 | 376.8 | 10G | 1 | 259.6                | 13G           | 1 | 352.3 | 10G  | 1 |
|                      | N272.2  | 372.0 | 12C | 0 | 376.9 | 10G | 1 | 259.5                | 13G           | 1 | 352.3 | 10G  | 1 |
|                      | N272.3  | 372.1 | 12C | 0 | 376.9 | 10G | 1 | 259.5>258.6<br>{1}   | 13G           | 1 | 352.3 | 10G  | 1 |
|                      | N272.4  | 372.5 | 12C | 0 | 377.1 | 10G | 1 | 259.5                | 13G           | 1 | 352.4 | 10G  | 1 |
|                      | N272.5  | 372.0 | 12C | 0 | 376.7 | 10G | 1 | 259.5                | 13G           | 1 | 352.3 | 10G  | 1 |
|                      | N272.6  | 372.0 | 12C | 0 | 377.1 | 10G | 1 | 256.1                | 14G           | 0 | 355.0 | 13G  | 1 |
| V88/3 <sup>rd</sup>  | N369.1  | 372.0 | 12C | 0 | 376.9 | 10G | 1 | 259.6>258.7<br>{1.2} | 13G           | 1 | 352.3 | 10G  | 1 |
|                      | N369.2  | 372.0 | 12C | 0 | 377.2 | 10G | 1 | 259.6                | 13G           | 1 | 352.3 | 10G  | 1 |
|                      | N369.3  | 372.1 | 12C | 0 | 377.7 | 11G | 0 | 256.4                | 14G           | 0 | 350.2 | 10G  | 1 |
|                      | N369.4  | 372.0 | 12C | 0 | 378.1 | 11G | 0 | 256.4                | 14G           | 0 | 352.4 | 10G  | 1 |
|                      | N369.5  | 372.0 | 12C | 0 | 376.8 | 10G | 1 | 259.4>258.5<br>{1.2} | 13G           | 1 | 352.3 | 10G  | 1 |
|                      | N369.6  | 371.9 | 12C | 0 | 377.1 | 10G | 1 | 259.4                | 13G           | 1 | 352.4 | 10G  | 1 |
| V88/4 <sup>th</sup>  | N449.1  | 372.0 | 12C | 0 | 377.9 | 11G | 0 | 255.3                | 13G           | 1 | 350.3 | 10G  | 1 |
|                      | N449.2  | 372.0 | 12C | 0 | 378.1 | 11G | 0 | 255.5                | 13G           | 1 | 350.4 | 10G  | 1 |
|                      | N449.3  | 372.0 | 12C | 0 | 377.9 | 11G | 0 | 255.4                | 13G           | 1 | 350.4 | 10G  | 1 |
|                      | N449.4  | 371.6 | 11C | 1 | 378.1 | 11G | 0 | 255.4                | 13G           | 1 | 350.4 | 10G  | 1 |
|                      | N449.5  | 372.0 | 12C | 0 | 377.9 | 11G | 0 | 255.4                | 13G           | 1 | 350.4 | 10G  | 1 |
|                      | N449.6  | 372.0 | 12C | 0 | 378.1 | 11G | 0 | 255.4                | 13G           | 1 | 350.2 | 10G  | 1 |
|                      |         |       |     |   |       |     |   |                      |               |   |       |      |   |
| V138/1 <sup>st</sup> | N138.1  | 370.1 | 10C | 0 | 375.7 | 9G  | 0 | 256.1<br>(379.4)     | 10G<br>(12G)  | 0 | 353.3 | 13G  | 1 |
|                      | N138.2  | 370.1 | 10C | 0 | 376.0 | 9G  | 0 | 256.0<br>(380.5)     | 10G*<br>(13G) | 0 | 355.1 | 13G* | 1 |
|                      | N138.3  | 370.0 | 10C | 0 | 375.9 | 9G  | 0 | 256.0<br>(380.5)     | 10G<br>(13G)  | 0 | 353.2 | 13G  | 1 |
|                      | N138.4  | 370.0 | 10C | 0 | 376.2 | 9G  | 0 | 256.0<br>(380.5)     | 10G<br>(13G)  | 0 | 355.1 | 13G  | 1 |
|                      | N138.5  | 370.1 | 10C | 0 | 375.7 | 9G  | 0 | 256.0<br>(380.5)     | 10G<br>(13G)  | 0 | 355.2 | 13G  | 1 |
|                      | N138.6  | 370.2 | 10C | 0 | 376.1 | 9G  | 0 | 256.1<br>(381.6)     | 10G<br>(14G)  | 1 | 355.2 | 13G  | 1 |

|                      |          |       |      |   |        |     |   |                  |               |    |       |      |   |
|----------------------|----------|-------|------|---|--------|-----|---|------------------|---------------|----|-------|------|---|
| V138/2 <sup>nd</sup> | N288.1   | 368.9 | 10C  | 0 | 375.7  | 9G  | 0 | 256.2<br>(380.6) | 10G*<br>(13G) | 0  | 355.0 | 13G* | 1 |
|                      | N288.2   | 370.0 | 10C  | 0 | 376.0  | 9G  | 0 | 256.2<br>(ND)    | 10G<br>(ND)   | ND | 355.2 | 13G  | 1 |
|                      | N288.3   | 370.1 | 10C  | 0 | 375.7  | 9G  | 0 | 256.2<br>(381.4) | 10G<br>(14G)  | 1  | 355.1 | 13G  | 1 |
|                      | N288.4   | 369.9 | 10C  | 0 | 376.2  | 9G  | 0 | 256.0<br>(380.4) | 10G<br>(13G)  | 0  | 355.1 | 13G  | 1 |
|                      | N288.5   | 370.1 | 10C  | 0 | 375.9  | 9G  | 0 | 256.0<br>(381.5) | 10G<br>(14G)  | 1  | 353.3 | 13G  | 1 |
|                      | N288.6   | 370.1 | 10C  | 0 | 376.2  | 9G  | 0 | 256.1<br>(380.4) | 10G<br>(13G)  | 0  | 355.0 | 13G  | 1 |
| V138/3 <sup>rd</sup> | N331.1   | 370.1 | 10C  | 0 | 375.8  | 9G  | 0 | 255.9<br>(379.6) | 10G<br>(12G)  | 0  | 355.2 | 13G  | 1 |
|                      | N331.2   | 370.0 | 10C  | 0 | 376.1  | 9G  | 0 | 256.0<br>(380.4) | 10G<br>(13G)  | 0  | 355.1 | 13G  | 1 |
|                      | N331.3   | 370.1 | 10C  | 0 | 375.6  | 9G  | 0 | 256.0<br>(380.3) | 10G<br>(13G)  | 0  | 355.2 | 13G  | 1 |
|                      | N331.4   | 370.0 | 10C  | 0 | 375.8  | 9G  | 0 | 256.1<br>(380.5) | 10G<br>(13G)  | 0  | 355.0 | 13G  | 1 |
|                      | N331.5   | 369.7 | 10C* | 0 | 375.7  | 9G  | 0 | 256.1<br>(380.4) | 10G<br>(13G*) | 0  | 355.1 | 13G  | 1 |
|                      | N331.6   | 370.0 | 10C  | 0 | 376.0  | 9G  | 0 | 256.2<br>(380.4) | 10G<br>(13G)  | 0  | 355.0 | 13G  | 1 |
| V138/4 <sup>th</sup> | Replaced |       |      |   |        |     |   |                  |               |    |       |      |   |
| <b>cc167</b>         |          |       |      |   |        |     |   |                  |               |    |       |      |   |
| V124/1 <sup>st</sup> | N124.1   | 368.9 | 9C   | 0 | 377.9  | 11G | 0 | 274.2            | 13G           | 1  | 386.0 | 11G  | 0 |
|                      | N124.2   | 369.2 | 9C   | 0 | 378.2  | 11G | 0 | 274.3            | 13G           | 1  | 386.1 | 11G  | 0 |
|                      | N124.3   | 369.0 | 9C   | 0 | 378.0  | 11G | 0 | 274.4            | 13G           | 1  | 386.2 | 11G  | 0 |
|                      | N124.4   | 369.1 | 9C   | 0 | 378.2  | 11G | 0 | 274.2            | 13G           | 1  | 385.2 | 10G  | 1 |
|                      | N124.5   | 369.0 | 9C   | 0 | 378.0  | 11G | 0 | 274.2            | 13G           | 1  | 385.1 | 10G  | 1 |
|                      | N124.6   | 369.2 | 9C   | 0 | 378.3  | 11G | 0 | 271.7            | 13G*          | 1  | 385.3 | 10G  | 1 |
| V124/2 <sup>nd</sup> | N290.1   | 369.0 | 9C   | 0 | 377.9  | 11G | 0 | 274.1            | 13G*          | 1  | 386.2 | 11G  | 0 |
|                      | N290.2   | 369.1 | 9C*  | 0 | 378.3* | 11G | 0 | 274.2            | 13G           | 1  | 385.3 | 10G  | 1 |
|                      | N290.3   | 368.7 | 9C   | 0 | 377.9  | 11G | 0 | 274.2            | 13G           | 1  | 385.2 | 10G  | 1 |
|                      | N290.4   | 369.1 | 9C   | 0 | 378.3  | 11G | 0 | 274.3            | 13G           | 1  | 386.2 | 11G  | 0 |
|                      | N290.5   | 368.9 | 9C   | 0 | 377.9  | 11G | 0 | 273.4            | 12G           | 0  | 385.1 | 10G  | 1 |

|                      |        |       |    |   |       |     |   |       |      |   |       |      |   |
|----------------------|--------|-------|----|---|-------|-----|---|-------|------|---|-------|------|---|
|                      | N290.6 | 369.2 | 9C | 0 | 378.3 | 11G | 0 | 271.0 | 10G  | 1 | 384.4 | 9G   | 0 |
| V124/3 <sup>rd</sup> | N336.1 | 369.0 | 9C | 0 | 376.7 | 10G | 1 | 273.3 | 12G  | 0 | 385.0 | 10G  | 1 |
|                      | N336.2 | 369.1 | 9C | 0 | 378.2 | 11G | 0 | 274.2 | 13G  | 1 | 385.2 | 10G  | 1 |
|                      | N336.3 | 369.0 | 9C | 0 | 376.9 | 10G | 1 | 273.3 | 12G  | 0 | 385.1 | 10G  | 1 |
|                      | N336.4 | 369.0 | 9C | 0 | 378.3 | 11G | 0 | 273.3 | 12G  | 0 | 385.2 | 10G  | 1 |
|                      | N336.5 | 369.1 | 9C | 0 | 377.1 | 10G | 1 | 272.4 | 11G  | 0 | 385.3 | 10G  | 1 |
|                      | N336.6 | 369.3 | 9C | 0 | 377.3 | 10G | 1 | 273.3 | 12G  | 0 | 385.3 | 10G  | 1 |
|                      |        |       |    |   |       |     |   |       |      |   |       |      |   |
| V64/1 <sup>st</sup>  | N64.1  | 369.1 | 9C | 0 | 377.9 | 11G | 0 | 275.2 | 14G* | 0 | 385.1 | 10G  | 1 |
|                      | N64.2  | 369.1 | 9C | 0 | 378.2 | 11G | 0 | 274.3 | 13G* | 1 | 385.1 | 10G* | 1 |
|                      | N64.3  | 368.9 | 9C | 0 | 378.0 | 11G | 0 | 274.2 | 13G  | 1 | 385.3 | 10G  | 1 |
|                      | N64.4  | 369.1 | 9C | 0 | 378.3 | 11G | 0 | 274.1 | 13G  | 1 | 385.0 | 10G  | 1 |
|                      | N64.5  | 368.9 | 9C | 0 | 377.9 | 11G | 0 | 274.2 | 13G  | 1 | 385.1 | 10G  | 1 |
|                      | N64.6  | 369.1 | 9C | 0 | 378.2 | 11G | 0 | 274.2 | 13G  | 1 | 385.1 | 10G  | 1 |
| V64/2 <sup>nd</sup>  | N257.1 | 368.9 | 9C | 0 | 377.8 | 11G | 0 | 274.2 | 13G  | 1 | 385.1 | 10G* | 1 |
|                      | N257.2 | 369.2 | 9C | 0 | 378.1 | 11G | 0 | 274.3 | 13G  | 1 | 385.2 | 10G  | 1 |
|                      | N257.3 | 369.1 | 9C | 0 | 377.9 | 11G | 0 | 274.3 | 13G  | 1 | 384.9 | 10G  | 1 |
|                      | N257.4 | 369.2 | 9C | 0 | 377.0 | 10G | 1 | 275.2 | 14G  | 0 | 385.0 | 10G  | 1 |
|                      | N257.5 | 369.0 | 9C | 0 | 378.0 | 11G | 0 | 274.3 | 13G  | 1 | 384.9 | 10G  | 1 |
|                      | N257.6 | 369.1 | 9C | 0 | 377.1 | 10G | 1 | 275.3 | 14G  | 0 | 384.6 | 10G  | 1 |
| V64/3 <sup>rd</sup>  | N348.1 | 369.0 | 9C | 0 | 377.9 | 11G | 0 | 275.2 | 14G  | 0 | 385.2 | 10G  | 1 |
|                      | N348.2 | 369.2 | 9C | 0 | 378.2 | 11G | 0 | 275.2 | 14G  | 0 | 385.2 | 10G  | 1 |
|                      | N348.3 | 368.9 | 9C | 0 | 378.3 | 11G | 0 | 272.9 | 14G  | 0 | 384.5 | 10G  | 1 |
|                      | N348.4 | 369.1 | 9C | 0 | 380.4 | 13G | 1 | 273.7 | 15G  | 0 | 384.3 | 10G  | 1 |
|                      | N348.5 | 368.9 | 9C | 0 | 377.4 | 11G | 0 | 275.1 | 14G  | 0 | 385.0 | 10G  | 1 |
|                      | N348.6 | 369.1 | 9C | 0 | 378.3 | 11G | 0 | 272.7 | 14G  | 0 | 384.2 | 10G  | 1 |
|                      |        |       |    |   |       |     |   |       |      |   |       |      |   |
| V117/1 <sup>st</sup> | N117.1 | 369.0 | 9C | 0 | 378.4 | 11G | 0 | 274.3 | 13G* | 1 | 384.1 | 9G   | 0 |
|                      | N117.2 | 369.1 | 9C | 0 | 378.4 | 11G | 0 | 274.3 | 13G* | 1 | 384.8 | 10G* | 1 |
| V117/2 <sup>nd</sup> | N284.1 | 368.9 | 9C | 0 | 378.2 | 11G | 0 | 273.3 | 12G  | 0 | 385.3 | 10G  | 1 |
|                      | N284.2 | 369.2 | 9C | 0 | 378.3 | 11G | 0 | 273.3 | 12G  | 0 | 385.3 | 10G  | 1 |
|                      | N284.3 | 369.0 | 9C | 0 | 378.3 | 11G | 0 | 274.3 | 13G  | 1 | 384.2 | 9G   | 0 |
|                      | N284.4 | 369.2 | 9C | 0 | 377.4 | 11G | 0 | 273.3 | 12G* | 0 | 385.0 | 10G  | 1 |
|                      | N284.5 | 369.0 | 9C | 0 | 378.2 | 11G | 0 | 274.3 | 13G  | 1 | 383.8 | 9G   | 0 |
|                      | N284.6 | 369.1 | 9C | 0 | 378.1 | 11G | 0 | 273.2 | 12G  | 0 | 384.7 | 10G  | 1 |
| V117/3 <sup>rd</sup> | N332.1 | 369.0 | 9C | 0 | 377.0 | 10G | 1 | 273.3 | 12G  | 0 | 385.1 | 10G  | 1 |
|                      | N332.2 | 369.3 | 9C | 0 | 377.4 | 10G | 1 | 273.4 | 12G  | 0 | 385.1 | 10G  | 1 |

|                      |             |       |     |   |                      |     |   |                      |      |   |       |      |   |
|----------------------|-------------|-------|-----|---|----------------------|-----|---|----------------------|------|---|-------|------|---|
|                      | N332.3      | 368.9 | 9C  | 0 | 377.2                | 10G | 1 | 270.9                | 12G  | 0 | 384.2 | 10G  | 1 |
|                      | N332.4      | 369.0 | 9C  | 0 | 378.3                | 11G | 0 | 271.8                | 13G  | 1 | 384.2 | 10G* | 1 |
|                      | N332.5      | 369.0 | 9C  | 0 | 378.3                | 11G | 0 | 274.2                | 13G  | 1 | 385.3 | 10G  | 1 |
|                      | N332.6      | 369.1 | 9C  | 0 | 379.3                | 12G | 0 | 274.2                | 13G  | 1 | 385.1 | 10G  | 1 |
| V117/4 <sup>th</sup> | N417.1      | 369.0 | 9C  | 0 | 379.4                | 12G | 0 | 274.2                | 13G  | 1 | 385.3 | 10G  | 1 |
|                      | N417.2      | 369.2 | 9C  | 0 | 379.3                | 12G | 0 | 274.2                | 13G  | 1 | 385.3 | 10G  | 1 |
|                      | N417.3      | 369.0 | 9C  | 0 | 379.3                | 12G | 0 | 272.9>271.9<br>{1.1} | 14G  | 0 | 384.5 | 10G* | 1 |
|                      | N417.4      | 369.1 | 9C  | 0 | 379.2                | 12G | 0 | 272.9>271.9<br>{1.1} | 14G  | 0 | 384.6 | 10G  | 1 |
|                      | N417.5      | 369.0 | 9C  | 0 | 379.3                | 12G | 0 | 275.2                | 14G  | 0 | 385.0 | 10G  | 1 |
|                      | N417.6      | 369.2 | 9C  | 0 | 379.3                | 12G | 0 | 275.2                | 14G  | 0 | 384.6 | 10G  | 1 |
|                      |             |       |     |   |                      |     |   |                      |      |   |       |      |   |
| <b>cc23</b>          |             |       |     |   |                      |     |   |                      |      |   |       |      |   |
| V69/1 <sup>st</sup>  | Non-carrier |       |     |   |                      |     |   |                      |      |   |       |      |   |
| V69/2 <sup>nd</sup>  | N258.1      | 370.9 | 11C | 1 | 379.6                | 13G | 1 | 277.6                | 12G* | 1 | 424.6 | 8G*  | 0 |
|                      | N258.2      | 370.6 | 11C | 1 | 379.5                | 13G | 1 | 279.6                | 12G  | 1 | 425.2 | 8G   | 0 |
|                      | N258.3      | 370.9 | 11C | 1 | 380.3                | 13G | 1 | 279.7                | 12G  | 1 | 425.3 | 8G   | 0 |
|                      | N258.4      | 370.8 | 11C | 1 | 380.2                | 13G | 1 | 279.7                | 12G  | 1 | 425.4 | 8G   | 0 |
|                      | N258.5      | 371.0 | 11C | 1 | 379.5                | 13G | 1 | 279.6                | 12G  | 1 | 425.3 | 8G   | 0 |
|                      | N258.6      | 370.6 | 11C | 1 | 379.3??              | 13G | 1 | 279.6                | 12G  | 1 | 425.4 | 8G   | 0 |
| V69/3 <sup>rd</sup>  | No sample   |       |     |   |                      |     |   |                      |      |   |       |      |   |
| V69/4 <sup>th</sup>  | N431.1      | 370.7 | 11C | 1 | 381.7                | 15G | 0 | 276.6                | 11G  | 0 | 425.7 | 9G*  | 1 |
|                      | N431.2      | 370.9 | 11C | 1 | 380.5                | 14G | 0 | 277.7                | 12G* | 1 | 425.5 | 9G   | 1 |
|                      | N431.3      | 370.8 | 11C | 1 | 380.7                | 14G | 0 | 279.6                | 12G  | 1 | 426.3 | 9G   | 1 |
|                      | N431.4      | 370.9 | 11C | 1 | 381.2                | 14G | 0 | 279.6                | 12G  | 1 | 426.4 | 9G   | 1 |
|                      | N431.5      | 370.7 | 11C | 1 | 381.4>380.5<br>{1.2} | 15G | 0 | 278.8                | 11G  | 0 | 425.7 | 9G   | 1 |
|                      | N431.6      | 370.9 | 11C | 1 | 381.1                | 14G | 0 | 278.7                | 11G  | 0 | 426.3 | 9G   | 1 |
|                      |             |       |     |   |                      |     |   |                      |      |   |       |      |   |
| V93/1 <sup>st</sup>  | Non-carrier |       |     |   |                      |     |   |                      |      |   |       |      |   |
| V93/2 <sup>nd</sup>  | N264.1      | 370.8 | 11C | 1 | 378.0                | 11G | 0 | 281.5>282.4<br>{1.1} | 14G  | 0 | 428.3 | 11G  | 0 |
|                      | N264.2      | 370.9 | 11C | 1 | 378.3                | 11G | 0 | 281.4>282.4<br>{1.1} | 14G* | 0 | 428.3 | 11G* | 0 |
|                      | N264.3      | 371.7 | 12C | 0 | 377.3                | 10G | 1 | 281.4>282.3<br>{1.1} | 14G  | 0 | 429.3 | 12G  | 1 |
|                      | N264.4      | 370.9 | 11C | 1 | 377.9                | 11G | 0 | 281.3>282.3          | 14G  | 0 | 428.3 | 11G  | 0 |

|                     |             |                      |      |   |                      |     |   |                      |      |   |                      |     |   |
|---------------------|-------------|----------------------|------|---|----------------------|-----|---|----------------------|------|---|----------------------|-----|---|
|                     |             |                      |      |   |                      |     |   | {1.0}                |      |   |                      |     |   |
|                     | N264.5      | 370.7                | 11C  | 1 | 378.3                | 11G | 0 | 281.4>282.3<br>{1.1} | 14G  | 0 | 428.3                | 11G | 0 |
|                     | N264.6      | 370.8                | 11C  | 1 | 378.2                | 11G | 0 | 281.4>282.3<br>{1.0} | 14G  | 0 | 429.3                | 12G | 1 |
| V93/3 <sup>rd</sup> | N359.1      | 370.8                | 11C  | 1 | 377.1                | 10G | 1 | 283.2>282.3<br>{1.0} | 15G  | 1 | 429.3                | 12G | 1 |
|                     | N359.2      | 370.9                | 11C  | 1 | 377.3                | 10G | 1 | 282.3>283.2<br>{1.2} | 15G  | 1 | 429.4                | 12G | 1 |
|                     | N359.3      | 370.8                | 11C  | 1 | 377.2                | 10G | 1 | 282.3>283.3<br>{1.1} | 15G  | 1 | 429.3                | 12G | 1 |
|                     | N359.4      | 370.9                | 11C  | 1 | 376.9                | 10G | 1 | 282.3>283.3<br>{1.1} | 15G  | 1 | 429.3                | 12G | 1 |
|                     | N359.5      | 370.7                | 11C  | 1 | 376.9                | 10G | 1 | 282.3>283.3<br>{1.1} | 15G  | 1 | 429.3                | 12G | 1 |
|                     | N359.6      | 370.9                | 11C  | 1 | 376.9                | 10G | 1 | 282.4>283.3<br>{1.2} | 15G  | 1 | 429.2                | 12G | 1 |
|                     |             |                      |      |   |                      |     |   |                      |      |   |                      |     |   |
| V96/1 <sup>st</sup> | Non-carrier |                      |      |   |                      |     |   |                      |      |   |                      |     |   |
| V96/2 <sup>nd</sup> | N259.1      | 370.7                | 11C  | 1 | 380.2                | 13G | 1 | 279.6                | 12G  | 1 | 426.3                | 9G  | 1 |
|                     | N259.2      | 370.9                | 11C  | 1 | 379.5                | 13G | 1 | 279.6                | 12G  | 1 | 426.5                | 9G  | 1 |
|                     | N259.3      | 371.7                | 12C  | 0 | 378.1                | 11G | 0 | 279.6                | 12G  | 1 | 427.2                | 10G | 0 |
|                     | N259.4      | 370.9                | 11C  | 1 | 380.2                | 13G | 1 | 279.6                | 12G  | 1 | 426.3                | 9G  | 1 |
|                     | N259.5      | 370.7                | 11C  | 1 | 379.3                | 12G | 0 | 279.6                | 12G  | 1 | 426.4                | 9G  | 1 |
|                     | N259.6      | 371.8                | 12C  | 0 | 377.1                | 11G | 0 | 279.7                | 12G  | 1 | 427.3                | 10G | 0 |
| V96/3 <sup>rd</sup> | N370.1      | 372.2                | 12C  | 0 | 381.5>382.5<br>{1}   | 15G | 0 | 277.9                | 10G* | 0 | 426.3                | 9G  | 1 |
|                     | N370.2      | 369.8                | 11C  | 1 | 380.4>379.4<br>{1.2} | 14G | 0 | 278.8                | 11G  | 0 | 426.3                | 9G  | 1 |
|                     | N370.3      | 371.8>370.8<br>{1.1} | 13C  | 0 | 378.3                | 11G | 0 | 278.7                | 11G  | 0 | 431.3>432.4<br>{1.1} | 14G | 0 |
|                     | N370.4      | 371.8>370.9<br>{1.1} | 13C  | 0 | 381.6>382.6<br>{1}   | 15G | 0 | 278.7                | 11G  | 0 | 426.4                | 9G  | 1 |
|                     | N370.5      | 370.8                | 11C  | 1 | 379.3                | 13G | 1 | 276.9                | 9G   | 1 | 425.4                | 8G  | 0 |
|                     | N370.6      | 370.0                | 12C* | 0 | 381.6>382.6<br>{1}   | 15G | 0 | 277.7                | 10G  | 0 | 426.4                | 9G  | 1 |
| V96/4 <sup>th</sup> | N445.1      | 372.3                | 12C  | 0 | 379.1                | 12G | 0 | 278.8                | 11G  | 0 | 426.4                | 9G  | 1 |
|                     | N445.2      | 374.8                | 16C  | 0 | 379.6                | 13G | 1 | 276.6                | 11G  | 0 | 426.4                | 9G  | 1 |

|                      |        |                      |      |   |       |     |   |                      |      |   |           |     |   |
|----------------------|--------|----------------------|------|---|-------|-----|---|----------------------|------|---|-----------|-----|---|
|                      | N445.3 | 375.7>3<br>76.7 {1}  | 17C  | 1 | 379.3 | 12G | 0 | 278.8                | 11G  | 0 | 426.3     | 9G  | 1 |
|                      | N445.4 | 374.8>3<br>75.7{1.1} | 16C  | 0 | 379.1 | 12G | 0 | 278.7                | 11G  | 0 | 426.3     | 9G  | 1 |
|                      | N445.5 | 371.0>3<br>71.9 {1}  | 12C  | 0 | 378.3 | 11G | 0 | 280.7>279.7<br>{1.1} | 13G  | 0 | 426.3     | 9G  | 1 |
|                      | N445.6 | 372.5                | 12C  | 0 | 377.2 | 10G | 1 | 278.8                | 11G  | 0 | 426.2     | 9G  | 1 |
|                      |        |                      |      |   |       |     |   |                      |      |   |           |     |   |
| V222/1 <sup>st</sup> | N222.1 | 370.8                | 11C  | 1 | 379.1 | 13G | 1 | 279.6                | 12G* | 1 | 425.4 (8) | 8G  | 0 |
|                      | N222.2 | 370.7                | 11C* | 1 | 380.2 | 13G | 1 | 280.5 (13)           | 13G  | 0 | 426.4 (9) | 9G* | 1 |
|                      | N222.3 | 371.8                | 12C* | 0 | 379.3 | 12G | 0 | 279.6 (12)           | 12G  | 1 | 425.4 (8) | 8G  | 0 |
|                      | N222.4 | 370.8                | 11C  | 1 | 379.4 | 13G | 1 | 279.7 (12)           | 12G  | 1 | 425.4 (8) | 8G  | 0 |
|                      | N222.5 | 370.8                | 11C  | 1 | 379.5 | 13G | 1 | 279.6 (12)           | 12G  | 1 | 425.2 (8) | 8G  | 0 |
|                      | N222.6 | 371.8                | 12C  | 0 | 379.1 | 12G | 0 | 279.9 (12)           | 12G  | 1 | 425.3 (8) | 8G  | 0 |
| V222/2 <sup>nd</sup> | N309.1 | 370.8                | 11C  | 1 | 379.2 | 13G | 1 | 279.7 (12)           | 12G  | 1 | 426.4 (9) | 9G  | 1 |
|                      | N309.2 | 370.8                | 11C  | 1 | 380.2 | 13G | 1 | 279.7 (12)           | 12G  | 1 | 426.3 (9) | 9G  | 1 |
|                      | N309.3 | 370.9                | 11C  | 1 | 380.3 | 13G | 1 | 279.6 (12)           | 12G  | 1 | 426.4 (9) | 9G  | 1 |
|                      | N309.4 | 370.7                | 11C  | 1 | 380.2 | 13G | 1 | 279.6 (12)           | 12G  | 1 | 426.5 (9) | 9G  | 1 |
|                      | N309.5 | 370.8                | 11C  | 1 | 380.5 | 14G | 0 | 279.5 (12)           | 12G  | 1 | 426.5 (9) | 9G  | 1 |
|                      | N309.6 | 370.7                | 11C  | 1 | 380.2 | 13G | 1 | 279.6 (12)           | 12G  | 1 | 426.5 (9) | 9G  | 1 |
| V222/3 <sup>rd</sup> | N391.1 | 370.9                | 11C  | 1 | 379.3 | 13G | 1 | 279.5 (12)           | 12G  | 1 | 426.5 (9) | 9G  | 1 |
|                      | N391.2 | 370.6                | 11C  | 1 | 379.6 | 13G | 1 | 279.6 (12)           | 12G  | 1 | 426.5 (9) | 9G  | 1 |
|                      | N391.3 | 370.8                | 11C  | 1 | 380.2 | 13G | 1 | 279.6 (12)           | 12G  | 1 | 426.3 (9) | 9G  | 1 |
|                      | N391.4 | 370.7                | 11C  | 1 | 380.1 | 13G | 1 | 279.6 (12)           | 12G  | 1 | 426.3 (9) | 9G  | 1 |
|                      | N391.5 | 370.9                | 11C  | 1 | 380.1 | 13G | 1 | 279.6 (12)           | 12G  | 1 | 426.4 (9) | 9G  | 1 |
|                      | N391.6 | 370.7                | 11C  | 1 | 380.1 | 13G | 1 | 277.7 (12)           | 12G  | 1 | 425.5 (9) | 9G  | 1 |
| V222/4 <sup>th</sup> | N459.1 | 370.8                | 11C  | 1 | 379.1 | 12G | 0 | 278.7                | 11G  | 0 | 426.5 (9) | 9G  | 1 |
|                      | N459.2 | 370.9                | 11C  | 1 | 379.1 | 12G | 0 | 278.6 (11)           | 11G  | 0 | 426.6 (9) | 9G  | 1 |
|                      | N459.3 | 370.8                | 11C  | 1 | 379.1 | 12G | 0 | 278.5 (11)           | 11G  | 0 | 426.3 (9) | 9G  | 1 |
|                      | N459.4 | 370.8                | 11C  | 1 | 379.1 | 12G | 0 | 279.5 (12)           | 12G  | 1 | 426.2 (9) | 9G  | 1 |
|                      | N459.5 | 371.0                | 11C  | 1 | 379.2 | 12G | 0 | 278.7 (11)           | 11G  | 0 | 426.5 (9) | 9G  | 1 |
|                      | N459.6 | 370.7                | 11C  | 1 | 379.1 | 12G | 0 | 277.5 (12)           | 12G  | 1 | 425.4 (9) | 8G  | 0 |
|                      |        |                      |      |   |       |     |   |                      |      |   |           |     |   |
| <b>cc60</b>          |        |                      |      |   |       |     |   |                      |      |   |           |     |   |
| V114/1 <sup>st</sup> | N114.1 | 370.6                | 11C  | 1 | 375.1 | 7G  | 0 | 274.8                | 10G* | 1 | 401.9     | 9G* | 0 |
|                      | N114.2 | 370.8                | 11C  | 1 | 375.3 | 7G  | 0 | 274.7                | 10G  | 1 | 401.0     | 8G  | 0 |

|                      |        |       |      |   |       |     |   |       |      |   |       |      |   |
|----------------------|--------|-------|------|---|-------|-----|---|-------|------|---|-------|------|---|
|                      | N114.3 | 370.7 | 11C  | 1 | 375.2 | 7G  | 0 | 274.8 | 10G  | 1 | 401.0 | 8G   | 0 |
|                      | N114.4 | 370.9 | 11C  | 1 | 375.4 | 7G  | 0 | 274.7 | 10G  | 1 | 401.1 | 8G   | 0 |
|                      | N114.5 | 370.7 | 11C  | 1 | 375.2 | 7G  | 0 | 274.8 | 10G  | 1 | 400.7 | 8G   | 0 |
|                      | N114.6 | 370.9 | 11C  | 1 | 375.4 | 7G  | 0 | 274.7 | 10G  | 1 | 401.1 | 8G   | 0 |
| V114/2 <sup>nd</sup> | N283.1 | 369.9 | 11C* | 1 | 375.2 | 7G  | 0 | 274.9 | 10G  | 1 | 400.9 | 8G   | 0 |
|                      | N283.2 | 369.9 | 11C  | 1 | 375.3 | 7G  | 0 | 274.7 | 10G  | 1 | 401.1 | 8G   | 0 |
|                      | N283.3 | 369.7 | 11C  | 1 | 375.0 | 7G  | 0 | 272.2 | 10G  | 1 | 401.7 | 10G* | 1 |
|                      | N283.4 | 370.8 | 11C  | 1 | 375.3 | 7G  | 0 | 272.3 | 10G  | 1 | 401.6 | 10G  | 1 |
|                      | N283.5 | 370.4 | 10C? | 0 | 374.9 | 7G* | 0 | 275.0 | 10G* | 1 | 400.6 | 9G   | 0 |
|                      | N283.6 | 370.6 | 11C  | 1 | 375.1 | 7G  | 0 | 274.7 | 10G  | 1 | 400.9 | 8G   | 0 |
| V114/3 <sup>rd</sup> | N330.1 | 372.7 | 13C* | 0 | 375.2 | 7G  | 0 | 273.1 | 8G   | 0 | 402.0 | 9G   | 0 |
|                      | N330.2 | 370.0 | 10C  | 0 | 375.5 | 7G  | 0 | 272.9 | 8G   | 0 | 402.1 | 9G   | 0 |
|                      | N330.3 | 370.0 | 10C* | 0 | 375.3 | 7G  | 0 | 272.9 | 8G   | 0 | 401.9 | 9G   | 0 |
|                      | N330.4 | 370.0 | 10C  | 0 | 375.4 | 7G  | 0 | 272.8 | 8G   | 0 | 402.2 | 9G   | 0 |
|                      | N330.5 | 370.9 | 11C  | 1 | 375.4 | 7G  | 0 | 273.1 | 8G   | 0 | 402.0 | 9G   | 0 |
|                      | N330.6 | 370.9 | 11C  | 1 | 375.5 | 7G  | 0 | 272.8 | 8G   | 0 | 402.0 | 9G   | 0 |
|                      |        |       |      |   |       |     |   |       |      |   |       |      |   |
| V134/1 <sup>st</sup> | N134.1 | 370.7 | 11C  | 1 | 375.4 | 7G  | 0 | 274.8 | 10G  | 1 | 400.9 | 8G   | 0 |
|                      | N134.2 | 370.9 | 11C* | 1 | 375.4 | 7G  | 0 | 274.6 | 10G  | 1 | 402.1 | 9G   | 0 |
|                      | N134.3 | 370.6 | 11C  | 1 | 375.2 | 7G  | 0 | 274.9 | 10G* | 1 | 402.0 | 9G   | 0 |
|                      | N134.4 | 370.8 | 11C  | 1 | 375.3 | 7G  | 0 | 274.7 | 10G  | 1 | 402.1 | 9G   | 0 |
|                      | N134.5 | 370.6 | 11C  | 1 | 375.1 | 7G  | 0 | 274.9 | 10G  | 1 | 401.9 | 9G   | 0 |
|                      | N134.6 | 370.7 | 11C  | 1 | 375.3 | 7G  | 0 | 274.7 | 10G  | 1 | 401.9 | 9G   | 0 |
| V134/2 <sup>nd</sup> | N295.1 | 370.5 | 11C? | 1 | 375.1 | 7G  | 0 | 274.7 | 10G  | 1 | 401.0 | 8G   | 0 |
|                      | N295.2 | 370.6 | 11C  | 1 | 375.4 | 7G  | 0 | 272.4 | 10G  | 1 | 400.5 | 9G*  | 0 |
|                      | N295.3 | 370.6 | 11C  | 1 | 375.3 | 7G  | 0 | 274.8 | 10G  | 1 | 401.0 | 8G   | 0 |
|                      | N295.4 | 370.5 | 11C  | 1 | 375.4 | 7G  | 0 | 274.6 | 10G  | 1 | 401.1 | 8G   | 0 |
|                      | N295.5 | 370.4 | 11C? | 1 | 375.3 | 7G  | 0 | 274.8 | 10G  | 1 | 400.9 | 8G   | 0 |
|                      | N295.6 | 369.9 | 11C  | 1 | 375.4 | 7G  | 0 | 274.7 | 10G  | 1 | 401.1 | 8G   | 0 |
| V134/3 <sup>rd</sup> | N333.1 | 370.9 | 11C  | 1 | 375.2 | 7G  | 0 | 274.8 | 10G  | 1 | 401.9 | 9G   | 0 |
|                      | N333.2 | 370.8 | 11C  | 1 | 375.5 | 7G  | 0 | 274.6 | 10G  | 1 | 402.0 | 9G   | 0 |
|                      | N333.3 | 370.9 | 11C  | 1 | 375.3 | 7G  | 0 | 274.9 | 10G  | 1 | 401.8 | 9G   | 0 |
|                      | N333.4 | 371.0 | 11C  | 1 | 375.5 | 7G  | 0 | 274.6 | 10G  | 1 | 402.1 | 9G   | 0 |
|                      | N333.5 | 370.9 | 11C  | 1 | 375.2 | 7G  | 0 | 275.0 | 10G  | 1 | 401.9 | 9G   | 0 |
|                      | N333.6 | 371.0 | 11C  | 1 | 375.3 | 7G  | 0 | 274.7 | 10G  | 1 | 401.8 | 9G   | 0 |
|                      |        |       |      |   |       |     |   |       |      |   |       |      |   |
| V185/1 <sup>st</sup> | N185.1 | 371.0 | 11C* | 1 | 376.2 | 8G  | 1 | 277.7 | 13G  | 1 | 402.9 | 10G  | 1 |

|                      |        |       |      |   |       |     |   |       |        |   |       |      |   |
|----------------------|--------|-------|------|---|-------|-----|---|-------|--------|---|-------|------|---|
|                      | N185.2 | 370.8 | 11C  | 1 | 376.4 | 8G  | 1 | 277.7 | 13G    | 1 | 402.6 | 10G  | 1 |
|                      | N185.3 | 370.9 | 11C  | 1 | 376.3 | 8G  | 1 | 276.9 | 12G    | 0 | 403.8 | 11G* | 0 |
|                      | N185.4 | 370.9 | 11C  | 1 | 376.5 | 8G  | 1 | 277.5 | 13G    | 1 | 403.0 | 10G  | 1 |
|                      | N185.5 | 370.9 | 11C  | 1 | 376.3 | 8G  | 1 | 277.5 | 13G    | 1 | 403.0 | 10G  | 1 |
|                      | N185.6 | 370.9 | 11C  | 1 | 376.0 | 8G  | 1 | 275.4 | 13G    | 1 | 401.8 | 10G  | 1 |
| V185/2 <sup>nd</sup> | N306.1 | 370.8 | 11C  | 1 | 376.2 | 8G  | 1 | 277.6 | 13G    | 1 | 402.8 | 10G  | 1 |
|                      | N306.2 | 370.8 | 11C  | 1 | 376.4 | 8G  | 1 | 277.7 | 13G    | 1 | 402.9 | 10G  | 1 |
|                      | N306.3 | 370.9 | 11C  | 1 | 376.3 | 8G  | 1 | 277.7 | 13G    | 1 | 402.8 | 10G  | 1 |
|                      | N306.4 | 370.9 | 11C  | 1 | 376.4 | 8G  | 1 | 277.5 | 13G    | 1 | 403.1 | 10G  | 1 |
|                      | N306.5 | 370.8 | 11C  | 1 | 376.2 | 8G  | 1 | 277.4 | 13G    | 1 | 403.0 | 10G  | 1 |
|                      | N306.6 | 370.8 | 11C  | 1 | 376.4 | 8G  | 1 | 277.6 | 13G    | 1 | 402.9 | 10G  | 1 |
| V185/4 <sup>th</sup> | N456.1 | 371.8 | 12C  | 0 | 376.2 | 8G  | 1 | 277.6 | 13G    | 1 | 401.9 | 9G   | 0 |
|                      | N456.2 | 371.8 | 12C  | 0 | 376.3 | 8G  | 1 | 277.6 | 13G    | 1 | 401.8 | 9G   | 0 |
|                      | N456.3 | 371.9 | 12C* | 0 | 376.3 | 8G  | 1 | 277.7 | 13G    | 1 | 402.8 | 10G  | 1 |
|                      | N456.4 | 371.8 | 12C  | 0 | 376.4 | 8G  | 1 | 277.5 | 13G    | 1 | 402.1 | 9G   | 0 |
|                      | N456.5 | 371.7 | 12C  | 0 | 376.3 | 8G  | 1 | 274.4 | 13G*?? | 1 | 401.9 | 9G   | 0 |
|                      | N456.6 | 371.7 | 12C  | 0 | 376.5 | 8G  | 1 | 277.5 | 13G    | 1 | 402.0 | 9G   | 0 |
|                      |        |       |      |   |       |     |   |       |        |   |       |      |   |
| V113/1 <sup>st</sup> | N113.1 | 369.8 | 11C* | 1 | 376.2 | 8G  | 1 | 274.8 | 10G    | 1 | 401.9 | 9G   | 0 |
|                      | N113.2 | 369.9 | 11C  | 1 | 376.4 | 8G  | 1 | 274.7 | 10G    | 1 | 401.0 | 8G   | 0 |
|                      | N113.3 | 369.8 | 11C  | 1 | 376.4 | 8G  | 1 | 274.8 | 10G    | 1 | 401.0 | 8G   | 0 |
|                      | N113.4 | 369.8 | 11C  | 1 | 376.4 | 8G  | 1 | 274.7 | 10G    | 1 | 401.1 | 8G   | 0 |
|                      | N113.5 | 369.6 | 11C  | 1 | 376.2 | 8G  | 1 | 274.8 | 10G    | 1 | 400.7 | 8G   | 0 |
|                      | N113.6 | 369.7 | 11C  | 1 | 376.4 | 8G  | 1 | 274.7 | 10G    | 1 | 401.1 | 8G   | 0 |
| V113/2 <sup>nd</sup> | N281.1 | 369.7 | 11C  | 1 | 376.2 | 8G  | 1 | 274.7 | 10G    | 1 | 401.9 | 9G   | 0 |
|                      | N281.2 | 369.8 | 11C  | 1 | 376.3 | 8G  | 1 | 274.6 | 10G    | 1 | 401.1 | 8G   | 0 |
|                      | N281.3 | 369.9 | 11C  | 1 | 376.3 | 8G  | 1 | 274.9 | 10G    | 1 | 401.9 | 9G   | 0 |
|                      | N281.4 | 369.9 | 11C  | 1 | 375.3 | 7G  | 0 | 273.8 | 9G     | 0 | 402.1 | 9G   | 0 |
|                      | N281.5 | 369.8 | 11C  | 1 | 376.2 | 8G  | 1 | 274.9 | 10G    | 1 | 400.8 | 8G   | 0 |
|                      | N281.6 | 369.8 | 11C  | 1 | 376.4 | 8G  | 1 | 274.7 | 10G    | 1 | 400.9 | 8G   | 0 |
|                      |        |       |      |   |       |     |   |       |        |   |       |      |   |
| V115/1 <sup>st</sup> | N115.1 | 369.9 | 11C  | 1 | 375.2 | 7G  | 0 | 274.9 | 10G    | 1 | 400.9 | 8G   | 0 |
|                      | N115.2 | 369.8 | 11C  | 1 | 374.9 | 7G  | 0 | 274.7 | 10G    | 1 | 401.1 | 8G   | 0 |
|                      | N115.3 | 369.8 | 11C  | 1 | 375.3 | 7G  | 0 | 274.9 | 10G    | 1 | 400.7 | 8G   | 0 |
|                      | N115.4 | 369.8 | 11C  | 1 | 375.3 | 7G  | 0 | 274.8 | 10G    | 1 | 400.9 | 8G   | 0 |
|                      | N115.5 | 369.9 | 11C  | 1 | 375.5 | 7G? | 0 | 275.0 | 10G    | 1 | 401.9 | 9G   | 0 |
|                      | N115.6 | 369.9 | 11C  | 1 | 375.6 | 7G? | 0 | 274.7 | 10G    | 1 | 401.7 | 9G   | 0 |

|                      |        |       |     |   |       |    |   |       |      |   |       |      |   |
|----------------------|--------|-------|-----|---|-------|----|---|-------|------|---|-------|------|---|
| V115/2 <sup>nd</sup> | N282.1 | 369.8 | 11C | 1 | 374.8 | 7G | 0 | 274.9 | 10G  | 1 | 401.8 | 9G   | 0 |
|                      | N282.2 | 369.9 | 11C | 1 | 374.8 | 7G | 0 | 274.7 | 10G  | 1 | 401.0 | 8G   | 0 |
|                      | N282.3 | 370.0 | 11C | 1 | 375.0 | 7G | 0 | 274.8 | 10G  | 1 | 402.0 | 9G   | 0 |
|                      | N282.4 | 369.9 | 11C | 1 | 374.8 | 7G | 0 | 272.2 | 10G  | 1 | 401.9 | 10G  | 1 |
|                      | N282.5 | 370.0 | 11C | 1 | 375.0 | 7G | 0 | 274.8 | 10G  | 1 | 401.9 | 9G   | 0 |
|                      | N282.6 | 369.9 | 11C | 1 | 374.9 | 7G | 0 | 274.7 | 10G  | 1 | 402.1 | 9G   | 0 |
|                      |        |       |     |   |       |    |   |       |      |   |       |      |   |
| <b>cc32</b>          |        |       |     |   |       |    |   |       |      |   |       |      |   |
| V176/1 <sup>st</sup> | N176.1 | 369.8 | 10C | 0 | 375.1 | 8G | 0 | 278.1 | 13G* | 1 | 429.4 | 12G* | 1 |
|                      | N176.2 | 369.6 | 10C | 0 | 375.2 | 8G | 0 | 278.0 | 13G  | 1 | 429.3 | 12G  | 1 |
|                      | N176.3 | 369.8 | 10C | 0 | 375.2 | 8G | 0 | 278.0 | 13G  | 1 | 429.4 | 12G  | 1 |
|                      | N176.4 | 369.6 | 10C | 0 | 375.0 | 8G | 0 | 278.0 | 13G  | 1 | 429.4 | 12G  | 1 |
|                      | N176.5 | 369.7 | 10C | 0 | 374.8 | 8G | 0 | 278.1 | 13G  | 1 | 429.4 | 12G  | 1 |
|                      | N176.6 | 369.6 | 10C | 0 | 374.9 | 8G | 0 | 278.1 | 13G  | 1 | 429.3 | 12G  | 1 |
| V176/2 <sup>nd</sup> | N318.1 | 369.7 | 10C | 0 | 374.8 | 8G | 0 | 278.0 | 13G  | 1 | 429.4 | 12G  | 1 |
|                      | N318.2 | 369.6 | 10C | 0 | 374.9 | 8G | 0 | 277.2 | 12G  | 0 | 429.3 | 12G  | 1 |
|                      | N318.3 | 369.0 | 9C  | 0 | 375.0 | 8G | 0 | 278.0 | 13G  | 1 | 429.3 | 12G  | 1 |
|                      | N318.4 | 369.7 | 10C | 0 | 374.8 | 8G | 0 | 277.9 | 13G  | 1 | 429.4 | 12G  | 1 |
|                      | N318.5 | 369.8 | 10C | 0 | 374.9 | 8G | 0 | 277.4 | 12G  | 0 | 429.4 | 12G  | 1 |
|                      | N318.6 | 369.6 | 10C | 0 | 374.8 | 8G | 0 | 277.0 | 12G  | 0 | 429.5 | 12G  | 1 |
| V176/3 <sup>rd</sup> | N399.1 | 369.8 | 10C | 0 | 374.9 | 8G | 0 | 277.0 | 12G* | 0 | 429.4 | 12G* | 1 |
|                      | N399.2 | 369.5 | 10C | 0 | 374.7 | 8G | 0 | 277.1 | 12G  | 0 | 429.4 | 12G  | 1 |
|                      | N399.3 | 369.8 | 10C | 0 | 374.8 | 8G | 0 | 277.1 | 12G  | 0 | 429.3 | 12G  | 1 |
|                      | N399.4 | 369.5 | 10C | 0 | 374.7 | 8G | 0 | 277.2 | 12G  | 0 | 429.3 | 12G  | 1 |
|                      | N399.5 | 369.7 | 10C | 0 | 374.9 | 8G | 0 | 277.1 | 12G  | 0 | 429.3 | 12G  | 1 |
|                      | N399.6 | 369.7 | 10C | 0 | 374.8 | 8G | 0 | 277.2 | 12G  | 0 | 429.3 | 12G  | 1 |
| V176/4 <sup>th</sup> | N408.1 | 369.9 | 10C | 0 | 375.1 | 8G | 0 | 277.3 | 12G* | 0 | 429.2 | 12G* | 1 |
|                      | N408.2 | 369.6 | 10C | 0 | 374.8 | 8G | 0 | 277.2 | 12G  | 0 | 429.2 | 12G  | 1 |
|                      | N408.3 | 369.8 | 10C | 0 | 374.9 | 8G | 0 | 277.2 | 12G  | 0 | 429.3 | 12G  | 1 |
|                      | N408.4 | 369.7 | 10C | 0 | 374.9 | 8G | 0 | 277.2 | 12G  | 0 | 429.3 | 12G  | 1 |
|                      | N408.5 | 369.9 | 10C | 0 | 375.1 | 8G | 0 | 277.2 | 12G  | 0 | 429.4 | 12G  | 1 |
|                      | N408.6 | 369.6 | 10C | 0 | 374.9 | 8G | 0 | 277.2 | 12G  | 0 | 429.3 | 12G  | 1 |

<sup>1</sup>Fragments sizes were determined using either a GS600LIZ (black type) or GS500LIZ (blue type) size standard; numbers in curly brackets indicate the ratio between the two major peaks where obvious multiple peaks were present (the largest peak was utilized if the ratio was >1.2; the larger repeat number equivalent peak was utilized if the ratio was <1.2); numbers in round brackets indicate the repeat number as determined from next generation whole genome sequence data; <sup>2</sup>an asterisk indicates that the PCR fragment was sequenced by dideoxy sequencing and the repeat number determined by visual inspection of the trace file. <sup>3</sup>Expression states, 1=1, 0=0 (all genes are subject to translational phase variation). <sup>4</sup>A subset of cc174 isolates contained a second polyC tract withing pilC, the data for this tract is indicated in brackets whilst the expression state is a combination of data from both tracts.



Supplementary Data Table II. Repeat numbers and expression states for the phase-variable pilin glycosylation genes

| Volunteer/<br>time pt | Isolate | Phase Variable Gene  |                    |                         |                   |                    |                         |                   |                    |                         |                   |                    |                         |
|-----------------------|---------|----------------------|--------------------|-------------------------|-------------------|--------------------|-------------------------|-------------------|--------------------|-------------------------|-------------------|--------------------|-------------------------|
|                       |         | <i>pgIA</i>          |                    |                         | <i>pgIE</i>       |                    |                         | <i>pgIH</i>       |                    |                         | <i>pgII</i>       |                    |                         |
|                       |         | Size <sup>1</sup>    | Tract <sup>2</sup> | Exp. State <sup>3</sup> | Size <sup>1</sup> | Tract <sup>2</sup> | Exp. State <sup>3</sup> | Size <sup>1</sup> | Tract <sup>2</sup> | Exp. State <sup>3</sup> | Size <sup>1</sup> | Tract <sup>2</sup> | Exp. State <sup>3</sup> |
| <b>cc174</b>          |         |                      |                    |                         |                   |                    |                         |                   |                    |                         |                   |                    |                         |
| V43/1 <sup>st</sup>   | N43.1.1 | 425.4                | 12G                | 0                       | 388.4             | 4CAAACAA*          | 1                       | 187.1             | 14C                | 0                       | 351.3             | 12G*               | 0                       |
|                       | N43.1.2 | 425.6                | 12G                | 0                       | 388.5             | 4CAAACAA           | 1                       | 187.1             | 14C                | 0                       | 352.5             | 13G                | 1                       |
|                       | N43.1.3 | 425.3                | 12G                | 0                       | 388.4             | 4CAAACAA           | 1                       | 187.1             | 14C                | 0                       | 352.4             | 13G                | 1                       |
|                       | N43.1.4 | 425.6                | 12G                | 0                       | 388.7             | 4CAAACAA           | 1                       | 187.2*            | 14C                | 0                       | 352.5             | 13G                | 1                       |
|                       | N43.1.5 | 425.3                | 12G                | 0                       | 388.6             | 4CAAACAA           | 1                       | 187.1             | 14C                | 0                       | 352.4             | 13G                | 1                       |
|                       | N43.1.6 | 425.6                | 12G                | 0                       | 388.5             | 4CAAACAA           | 1                       | 187.1             | 14C                | 0                       | 352.5             | 13G                | 1                       |
| V43/2 <sup>nd</sup>   | N241.1  | 426.1                | 12G                | 0                       | 562.9             | 29CAAACAA*         | 0                       | 187.9             | 15C                | 0                       | 349.7 (10)        | 10G*               | 1                       |
|                       | N241.2  | 425.7>426.7<br>{1.2} | 12G                | 0                       | 562.4             | 29CAAACAA          | 0                       | 188.0             | 15C                | 0                       | 349.2             | 10G                | 1                       |
| V43/3 <sup>rd</sup>   | N349.1  | 426.1>427.1<br>{1.1} | 13G                | 0                       | 562.3             | 29CAAACAA*         | 0                       | 188.9>189.9 {1.1} | 16C                | 1                       | 349.7 (10)        | 10G*               | 1                       |
|                       | N349.2  | 426.1>427.1<br>{1.1} | 13G                | 0                       | 562.1             | 29CAAACAA          | 0                       | 189.0             | 16C                | 1                       | 349.4             | 10G                | 1                       |
|                       | N349.3  | 425.7>426.7<br>{1.1} | 13G                | 0                       | 562.1             | 29CAAACAA          | 0                       | 189.0             | 16C                | 1                       | 349.2             | 10G                | 1                       |
|                       | N349.4  | 426.0>427.0<br>{1.2} | 13G                | 0                       | 555.6             | 28CAAACAA          | 1                       | 189.0             | 16C                | 1                       | 349.3             | 10G                | 1                       |
|                       | N349.5  | 425.6                | 12G                | 0                       | 570.1             | 30CAAACAA          | 0                       | 189.0>189.9 {1.2} | 16C                | 1                       | 349.2             | 10G                | 1                       |
|                       | N349.6  | 426.0>427.0<br>{1.2} | 12G                | 0                       | 562.8             | 29CAAACAA          | 0                       | 189.0>190.0 {1.2} | 16C                | 1                       | 349.3             | 10G                | 1                       |
| V43/4 <sup>th</sup>   | Cleared |                      |                    |                         |                   |                    |                         |                   |                    |                         |                   |                    |                         |
| V51/1 <sup>st</sup>   | N51.1   | 424.6 (11)           | 11G*               | 1                       | 563.1             | 29CAAACAA*         | 0                       | 188.0*            | 15C                | 0                       | 349.6 (10)        | 10G                | 1                       |
|                       | N51.2   | 424.3 (11)           | 11G                | 1                       | 562.7             | 29CAAACAA          | 0                       | 188.0>189.0 {1.2} | 15C                | 0                       | 349.3             | 10G                | 1                       |
|                       | N51.3   | 424.5 (11)           | 11G*               | 1                       | 562.6             | 29CAAACAA          | 0                       | 188.0             | 15C                | 0                       | 349.3             | 10G                | 1                       |
|                       | N51.4   | 424.3 (11)           | 11G                | 1                       | 561.8             | 29CAAACAA          | 0                       | 188.0             | 15C                | 0                       | 349.4             | 10G                | 1                       |
|                       | N51.5   | 424.5 (11)           | 11G                | 1                       | 562.6             | 29CAAACAA          | 0                       | 188.0>188.9 {1.2} | 15C                | 0                       | 349.4             | 10G                | 1                       |
|                       | N51.6   | 424.3 (11)           | 11G                | 1                       | 562.1             | 29CAAACAA          | 0                       | 188.1>189 {1.2}   | 15C                | 0                       | 349.4             | 10G                | 1                       |
| V51/2 <sup>nd</sup>   | N236.1  | 424.5                | 11G                | 1                       | 563.0             | 29CAAACAA          | 0                       | 187.9>188.8 {1.1} | 15C                | 0                       | 349.4             | 10G                | 1                       |
|                       | N236.2  | 424.3 (11)           | 11G                | 1                       | 562.2             | 29CAAACAA          | 0                       | 187.9             | 15C                | 0                       | 349.3             | 10G                | 1                       |
|                       | N236.3  | 424.5 (11)           | 11G                | 1                       | 562.7             | 29CAAACAA          | 0                       | 187.9>188.9 {1.2} | 15C                | 0                       | 349.3             | 10G                | 1                       |

|                     |         |                      |     |   |               |            |   |                               |     |   |                   |      |   |
|---------------------|---------|----------------------|-----|---|---------------|------------|---|-------------------------------|-----|---|-------------------|------|---|
|                     | N236.4  | 424.2 (11)           | 11G | 1 | 562.6         | 29CAAACAA  | 0 | 187.9                         | 15C | 0 | 349.7             | 10G  | 1 |
|                     | N236.5  | 424.5 (11)           | 11G | 1 | 561.9         | 29CAAACAA  | 0 | 187.9                         | 15C | 0 | 349.4             | 10G  | 1 |
|                     | N236.6  | 424.2 (11)           | 11G | 1 | 562.1         | 29CAAACAA  | 0 | 187.9                         | 15C | 0 | 349.1             | 10G* | 1 |
| V51/3 <sup>rd</sup> | N354.1  | 424.4                | 11G | 1 | 554.8         | 28CAAACAA  | 1 | 190.9>191.8 {1.2}             | 18C | 0 | 349.3             | 10G  | 1 |
|                     | N354.2  | 424.4 (11)           | 11G | 1 | 554.7         | 28CAAACAA  | 1 | 190.9>191.8<br>{1.2}*<br>(10) | 18C | 0 | 349.5             | 10G  | 1 |
|                     | N354.3  | 424.5 (11)           | 11G | 1 | 555.2         | 28CAAACAA  | 1 | 190.9>191.9 {1.1}             | 18C | 0 | 349.4             | 10G  | 1 |
|                     | N354.4  | 424.4 (11)           | 11G | 1 | 555.4         | 28CAAACAA  | 1 | 190.8*                        | 18C | 0 | 349.4             | 10G  | 1 |
|                     | N354.5  | 424.5 (11)           | 11G | 1 | 569.8         | 30CAAACAA  | 0 | 188.0                         | 15C | 0 | 349.5             | 10G  | 1 |
|                     | N354.6  | 424.3 (11)           | 11G | 1 | 554.9         | 28CAAACAA  | 1 | 190.9>190.0 {1.1}             | 17C | 0 | 349.5             | 10G  | 1 |
| V51/4 <sup>th</sup> | N424.1  | 423.5                | 10G | 0 | 583.6<br>(13) | 32CAAACAA  | 0 | 188.1                         | 15C | 0 | 349.7 (10)        | 10G  | 1 |
|                     | N424.2  | 423.5                | 10G | 0 | 582.9         | 32CAAACAA  | 0 | 187.9                         | 15C | 0 | 349.4             | 10G  | 1 |
|                     | N424.3  | 423.2                | 10G | 0 | 583.1         | 32CAAACAA  | 0 | 188.0                         | 15C | 0 | 349.5             | 10G  | 1 |
|                     | N424.4  | 423.5                | 10G | 0 | 583.6         | 32CAAACAA  | 0 | 187.9                         | 15C | 0 | 349.5             | 10G  | 1 |
|                     | N424.5  | 423.2                | 10G | 0 | 583.0         | 32CAAACAA  | 0 | 187.9>188.8 {1.1}             | 15C | 0 | 349.3             | 10G  | 1 |
|                     | N424.6  | 423.4                | 10G | 0 | 576.5         | 31CAAACAA  | 1 | 188>188.9 {1.2}               | 15C | 0 | 349.4             | 10G  | 1 |
|                     |         |                      |     |   |               |            |   |                               |     |   |                   |      |   |
| V52/1 <sup>st</sup> | N52.1   | 426.2                | 12G | 0 | 562.3         | 29CAAACAA  | 0 | 189.0>190 {1.2}               | 16C | 1 | 349.6 (10)        | 10G  | 1 |
|                     | N52.2   | 425.7                | 12G | 0 | 562.1         | 29CAAACAA  | 0 | 189.1>190 {1.2}               | 16C | 1 | 349.3             | 10G  | 1 |
|                     | N52.3   | 426.0                | 12G | 0 | 562.6         | 29CAAACAA  | 0 | 189>190 {1.2}                 | 16C | 1 | 349.3             | 10G  | 1 |
|                     | N52.4   | 425.8                | 12G | 0 | 562.4         | 29CAAACAA  | 0 | 189>189.9 {1.2}               | 16C | 1 | 349.4             | 10G  | 1 |
|                     | N52.5   | 426.1                | 12G | 0 | 562.4         | 29CAAACAA  | 0 | 189>190 {1.2}                 | 16C | 1 | 349.5             | 10G  | 1 |
|                     | N52.6   | 425.9                | 12G | 0 | 562.5         | 29CAAACAA  | 0 | 189.0>189.9 {1.2}             | 16C | 1 | 349.4             | 10G  | 1 |
| V52/2 <sup>nd</sup> | N238.1  | 427.2                | 13G | 0 | 533.7         | 25CAAACAA  | 1 | 189.0>189.8 {1.0}             | 16C | 1 | 349.4             | 10G  | 1 |
|                     | N238.2  | 427.9                | 14G | 1 | 533.7         | 25CAAACAA  | 1 | 189>189.9 {1.1}               | 16C | 1 | 349.4             | 10G  | 1 |
|                     | N238.3  | 427.1                | 13G | 0 | 576.3         | 31CAAACAA  | 1 | 188.9>189.9 {1.0}             | 16C | 1 | 349.4             | 10G  | 1 |
|                     | N238.4  | 427.1                | 13G | 0 | 533.6         | 25CAAACAA  | 1 | 189.0                         | 16C | 1 | 349.5             | 10G  | 1 |
|                     | N238.5  | 427.2                | 13G | 0 | 533.7         | 25CAAACAA  | 1 | 188.9>189.9 {1.0}             | 16C | 1 | 349.6             | 10G  | 1 |
|                     | N238.6  | 427.9>426.8<br>{1.1} | 14G | 1 | 576.9         | 31CAAACAA  | 1 | 189.0                         | 16C | 1 | 349.4             | 10G  | 1 |
| V52/3 <sup>rd</sup> | N342.1  | 427.1                | 13G | 0 | 577.4         | 31CAAACAA* | 1 | 188.0                         | 15C | 0 | 351.5             | 12G  | 0 |
| V52/4 <sup>th</sup> | Cleared |                      |     |   |               |            |   |                               |     |   |                   |      |   |
|                     |         |                      |     |   |               |            |   |                               |     |   |                   |      |   |
| V54/1 <sup>st</sup> | N54.1.1 | 424.6 (11)           | 11G | 1 | 388.8<br>(4)  | 4CAAACAA*  | 1 | 186.2                         | 13C | 1 | 349.6             | 10G  | 1 |
|                     | N54.1.2 | 424.5                | 11G | 1 | 388.8         | 4CAAACAA   | 1 | 186.3>185.2 {1.1}             | 12C | 0 | 352.5>351.5 {1.0} | 12G  | 0 |

|                     |          |                      |     |   |               |           |   |                   |     |   |                   |     |   |
|---------------------|----------|----------------------|-----|---|---------------|-----------|---|-------------------|-----|---|-------------------|-----|---|
|                     | N54.1.3  | 424.3                | 11G | 1 | 388.7         | 4CAAACAA  | 1 | 186.2             | 13C | 1 | 352.5>351.5 {1.2} | 13G | 1 |
|                     | N54.1.4  | 424.5                | 11G | 1 | 388.7         | 4CAAACAA  | 1 | 186.2>185.2 {1.0} | 12C | 0 | 352.5>351.5 {1.1} | 12G | 0 |
|                     | N54.1.5  | 424.4                | 11G | 1 | 388.7         | 4CAAACAA  | 1 | 186.2>185.1 {1.1} | 12C | 0 | 352.5>351.5 {1.0} | 12G | 0 |
|                     | N54.1.6  | 424.5                | 11G | 1 | 388.8         | 4CAAACAA  | 1 | 186.1>185 {1.2}   | 13C | 1 | 352.5>351.5 {1.0} | 12G | 0 |
| V54/2 <sup>nd</sup> | N237.1   | 424.4                | 11G | 1 | 388.8         | 4CAAACAA  | 1 | 185.1             | 12C | 0 | 351.4             | 12G | 0 |
|                     | N237.2   | 425.6                | 12G | 0 | 388.8         | 4CAAACAA  | 1 | 186.1             | 13C | 1 | 351.5             | 12G | 0 |
|                     | N237.3   | 424.4                | 11G | 1 | 388.7         | 4CAAACAA  | 1 | 184.2             | 11C | 0 | 351.5             | 12G | 0 |
|                     | N237.4   | 424.6                | 11G | 1 | 388.8         | 4CAAACAA  | 1 | 188>187 {1.1}     | 14C | 0 | 351.5             | 12G | 0 |
|                     | N237.5   | 424.6                | 11G | 1 | 388.7         | 4CAAACAA  | 1 | 184.1             | 11C | 0 | 352.3             | 13G | 1 |
|                     | N237.6   | 424.5                | 11G | 1 | 388.8         | 4CAAACAA  | 1 | 187>188 {1.1}     | 14C | 0 | 352.5             | 13G | 1 |
| V54/3 <sup>rd</sup> | N343.1   | 424.5 (11)           | 11G | 1 | 388.6 (4)     | 4CAAACAA  | 1 | 186.2             | 13C | 1 | 351.5>352.6 {1.2} | 12G | 0 |
|                     | N343.2   | 424.3                | 11G | 1 | 388.7         | 4CAAACAA  | 1 | 185.1             | 12C | 0 | 352.4             | 13G | 1 |
|                     | N343.3   | 424.5                | 11G | 1 | 388.7         | 4CAAACAA  | 1 | 186.1             | 13C | 1 | 352.5             | 13G | 1 |
|                     | N343.4   | 424.3                | 11G | 1 | 388.6         | 4CAAACAA  | 1 | 185.2             | 12C | 0 | 352.4             | 13G | 1 |
|                     | N343.5   | 424.5                | 11G | 1 | 388.8         | 4CAAACAA  | 1 | 184.2             | 11C | 0 | 352.5>351.4 {1.1} | 12G | 0 |
|                     | N343.6   | 424.3                | 11G | 1 | 388.7         | 4CAAACAA  | 1 | 186.1             | 13C | 1 | 352.4             | 13G | 1 |
| V54/4 <sup>th</sup> | Replaced |                      |     |   |               |           |   |                   |     |   |                   |     |   |
|                     |          |                      |     |   |               |           |   |                   |     |   |                   |     |   |
| V58/1 <sup>st</sup> | N58.1    | 426.2                | 12G | 0 | 562.9<br>(13) | 29CAAACAA | 0 | 188.1             | 15C | 0 | 349.7 (10)        | 10G | 1 |
|                     | N58.2    | 426.1                | 12G | 0 | 561.3         | 29CAAACAA | 0 | 188.2             | 15C | 0 | 349.5             | 10G | 1 |
|                     | N58.3    | 426.8>425.8<br>{1.1} | 13G | 0 | 562.2         | 29CAAACAA | 0 | 188.0             | 15C | 0 | 349.5             | 10G | 1 |
|                     | N58.4    | 426.1                | 12G | 0 | 561.7         | 29CAAACAA | 0 | 188.3             | 15C | 0 | 349.6             | 10G | 1 |
|                     | N58.5    | 425.8                | 12G | 0 | 562.1         | 29CAAACAA | 0 | 188.2             | 15C | 0 | 349.5             | 10G | 1 |
|                     | N58.6    | 425.7                | 12G | 0 | 561.8         | 29CAAACAA | 0 | 188.2             | 15C | 0 | 349.5             | 10G | 1 |
| V58/2 <sup>nd</sup> | N240.1   | 427.9                | 14G | 1 | 562.2         | 29CAAACAA | 0 | 188.0             | 15C | 0 | 349.5             | 10G | 1 |
|                     | N240.2   | 426.1                | 12G | 0 | 562.4         | 29CAAACAA | 0 | 187.9             | 15C | 0 | 349.6             | 10G | 1 |
| V58/3 <sup>rd</sup> | Cleared  |                      |     |   |               |           |   |                   |     |   |                   |     |   |
| V58/4 <sup>th</sup> | N429.1   | 425.9                | 12G | 0 | 533.8<br>(13) | 25CAAACAA | 1 | 189.0             | 16C | 1 | 349.7>348.6 {1.2} | 10G | 1 |
|                     | N429.2   | 426.8>425.8<br>{1.1} | 13G | 0 | 533.7         | 25CAAACAA | 1 | 189.0             | 16C | 1 | 349.4             | 10G | 1 |
|                     | N429.3   | 427.1>426.1<br>{1.1} | 13G | 0 | 518.5         | 23CAAACAA | 0 | 189.0             | 16C | 1 | 349.6             | 10G | 1 |
|                     | N429.4   | 426.7>425.8<br>{1.2} | 13G | 0 | 518.8         | 23CAAACAA | 0 | 189.0             | 16C | 1 | 349.3             | 10G | 1 |
|                     | N429.5   | 426.1>427.1          | 13G | 0 | 533.5         | 25CAAACAA | 1 | 189.0             | 16C | 1 | 349.6             | 10G | 1 |

|                     |          |                      |     |   |       |           |   |                   |     |   |                   |     |   |
|---------------------|----------|----------------------|-----|---|-------|-----------|---|-------------------|-----|---|-------------------|-----|---|
|                     |          | {1.0}                |     |   |       |           |   |                   |     |   |                   |     |   |
|                     | N429.6   | 426.8>425.8<br>{1.1} | 13G | 0 | 518.7 | 23CAAACAA | 0 | 189.1             | 16C | 1 | 349.4             | 10G | 1 |
| V59/1 <sup>st</sup> | N59.1.1  | 426.1                | 12G | 0 | 563.1 | 29CAAACAA | 0 | 189.9             | 17C | 0 | 349.6 (10)        | 10G | 1 |
|                     | N59.1.2  | 426.0>427.0<br>{1.1} | 13G | 0 | 562.7 | 29CAAACAA | 0 | 189.9             | 17C | 0 | 349.3             | 10G | 1 |
|                     | N59.1.3  | 425.8                | 12G | 0 | 556.0 | 28CAAACAA | 0 | 189.9             | 17C | 0 | 349.5>348.6 {1.0} | 9G  | 0 |
|                     | N59.1.4  | 426.0>427.1<br>{1.2} | 12G | 0 | 562.6 | 29CAAACAA | 0 | 190.0             | 17C | 0 | 349.5             | 10G | 1 |
|                     | N59.1.5  | 425.8>426.8<br>{1.1} | 13G | 0 | 562.6 | 29CAAACAA | 0 | 190.0             | 17C | 0 | 349.4             | 10G | 1 |
|                     | N59.1.6  | 426.0>427.1<br>{1.2} | 12G | 0 | 562.3 | 29CAAACAA | 0 | 190.0             | 17C | 0 | 349.6             | 10G | 1 |
|                     | N59.1.7  | 426.2                | 12G | 0 | 563.3 | 29CAAACAA | 0 | No data           |     |   | 349.6             | 10G | 1 |
|                     | N59.1.8  | 426.1                | 12G | 0 | 562.9 | 29CAAACAA | 0 | No data           |     |   | 349.6             | 10G | 1 |
|                     | N59.1.9  | 426.1                | 12G | 0 | 562.7 | 29CAAACAA | 0 | No data           |     |   | 349.6             | 10G | 1 |
|                     | N59.1.10 | 426.0                | 12G | 0 | 562.8 | 29CAAACAA | 0 | No data           |     |   | 349.6             | 10G | 1 |
| V59/2 <sup>nd</sup> | N253.1   | 425.8                | 12G | 0 | 562.3 | 29CAAACAA | 0 | 190.0>189.0 {1.0} | 16C | 1 | 349.5             | 10G | 1 |
|                     | N253.2   | 426.0                | 12G | 0 | 562.2 | 29CAAACAA | 0 | 189.0>190.0 {1.1} | 16C | 1 | 349.4             | 10G | 1 |
|                     | N253.3   | 425.6>426.8<br>{1.0} | 13G | 0 | 562.6 | 29CAAACAA | 0 | 190.0>189.0 {1.1} | 16C | 1 | 349.3             | 10G | 1 |
|                     | N253.4   | 426.0>427 {1.1}      | 13G | 0 | 562.3 | 29CAAACAA | 0 | 189.9>189.0 {1.0} | 16C | 1 | 349.3             | 10G | 1 |
|                     | N253.5   | 425.6>426.6<br>{1.1} | 13G | 0 | 562.9 | 29CAAACAA | 0 | 189.9>189.0 {1.1} | 16C | 1 | 349.4             | 10G | 1 |
|                     | N253.6   | 426.0>427 {1.1}      | 13G | 0 | 562.7 | 29CAAACAA | 0 | 190.0>189.0 {1.0} | 16C | 1 | 349.3             | 10G | 1 |
|                     | N253.7   | 426.0>427.1<br>{1.1} | 13G | 0 | 562.5 | 29CAAACAA | 0 | No data           |     |   | 348.5>349.6 {1.1} | 9G  | 0 |
|                     | N253.8   | 426.1>427.1<br>{1.1} | 13G | 0 | 562.9 | 29CAAACAA | 0 | No data           |     |   | 348.5>349.5 {1.1} | 9G  | 0 |
|                     | N253.9   | 426.1>427.2<br>{1.1} | 13G | 0 | 562.7 | 29CAAACAA | 0 | No data           |     |   | 348.5>349.5 {1.1} | 9G  | 0 |
|                     | N253.10  | 426.1>427.2<br>{1.1} | 13G | 0 | 563.1 | 29CAAACAA | 0 | No data           |     |   | 348.4>349.5 {1.0} | 9G  | 0 |
| V59/3 <sup>rd</sup> | N352.1   | 425.7                | 12G | 0 | 562.5 | 29CAAACAA | 0 | 189.0>187.8 {1.1} | 15C | 0 | 349.3             | 10G | 1 |
|                     | N352.2   | 425.9>424.9<br>{1.2} | 12G | 0 | 562.5 | 29CAAACAA | 0 | 189.0>188.0 {1.1} | 15C | 0 | 349.4             | 10G | 1 |
|                     | N352.3   | 425.7>426.7          | 13G | 0 | 562.4 | 29CAAACAA | 0 | 188.6>187.9 {1.1} | 15C | 0 | 349.3             | 10G | 1 |

|                     |         |                      |      |   |               |            |   |                   |     |   |                   |     |   |
|---------------------|---------|----------------------|------|---|---------------|------------|---|-------------------|-----|---|-------------------|-----|---|
|                     |         | {1.1}                |      |   |               |            |   |                   |     |   |                   |     |   |
|                     | N352.4  | 424.9                | 11G  | 1 | 576.6         | 31CAAACAA  | 1 | 189.0>187.9 {1.1} | 15C | 0 | 350.7             | 11G | 0 |
|                     | N352.5  | 425.7>426.8<br>{1.0} | 13G  | 0 | 562.3         | 29CAAACAA  | 0 | 189.0>187.9 {1.1} | 15C | 0 | 349.4             | 10G | 1 |
|                     | N352.6  | 426.0>427.0<br>{1.0} | 13G  | 0 | 562.9         | 29CAAACAA  | 0 | 189.0>187.9 {1.1} | 15C | 0 | 349.5             | 10G | 1 |
|                     | N352.7  | 424.9>426.0<br>{1.1} | 12G  | 0 | 555.4         | 28CAAACAA  | 1 | No data           |     |   | 348.4>349.4 {1.0} | 9G  | 0 |
|                     | N352.8  | 426.1                | 12G  | 0 | 562.8         | 29CAAACAA  | 0 | No data           |     |   | 349.5             | 10G | 1 |
|                     | N352.9  | 425.1>426.1<br>{1.1} | 12G  | 0 | 562.2         | 29CAAACAA  | 0 | No data           |     |   | 349.5             | 10G | 1 |
|                     | N352.10 | 425.2>426.2<br>{1.1} | 12G  | 0 | 563.5         | 29CAAACAA  | 0 | No data           |     |   | 349.5             | 10G | 1 |
| V59/4 <sup>th</sup> | N438.1  | 426.0                | 12G  | 0 | 562.7<br>(13) | 29CAAACAA  | 0 | 188.0>188.9 {1.0} | 15C | 0 | 349.7 (10)        | 10G | 1 |
|                     | N438.2  | 425.8>426.8<br>{1.0} | 13G  | 0 | 562.6         | 29CAAACAA  | 0 | 188.0>188.9 {1.1} | 15C | 0 | 349.4             | 10G | 1 |
|                     | N438.3  | 427.0>426.0<br>{1.0} | 13G  | 0 | 562.4         | 29CAAACAA  | 0 | 187.9>188.9 {1.1} | 15C | 0 | 349.4             | 10G | 1 |
|                     | N438.4  | 425.7                | 12G  | 0 | 562.5         | 29CAAACAA  | 0 | 188.0>188.9 {1.1} | 15C | 0 | 349.4             | 10G | 1 |
|                     | N438.5  | 426.0>427.0<br>{1.2} | 12G  | 0 | 562.4         | 29CAAACAA  | 0 | 187.9>188.9 {1.1} | 15C | 0 | 349.4             | 10G | 1 |
|                     | N438.6  | 426.0>427.0<br>{1.0} | 13G  | 0 | 562.0         | 29CAAACAA  | 0 | 187.9>188.9 {1.1} | 15C | 0 | 349.5             | 10G | 1 |
|                     | N438.7  | 426.1>427.2<br>{1.1} | 13G  | 0 | 563.3         | 29CAAACAA  | 0 | No data           |     |   |                   |     |   |
|                     | N438.8  | 426.0>427.0<br>{1.1} | 13G  | 0 | 563.3         | 29CAAACAA  | 0 | No data           |     |   | 349.4             | 10G | 1 |
|                     | N438.9  | 426.0>427.0<br>{1.1} | 13G  | 0 | 563.3         | 29CAAACAA  | 0 | No data           |     |   | 349.6             | 10G | 1 |
|                     | N438.10 | 426.1>427.1<br>{1.1} | 13G  | 0 |               |            |   |                   |     |   | 349.3             | 10G | 1 |
|                     |         |                      |      |   |               |            |   |                   |     |   |                   |     |   |
| V88/1 <sup>st</sup> | N88.1.1 | 427.6                | 14G* | 1 | 518.7         | 23CAAACAA* | 0 | 188.9             | 16C | 1 | 351.6>352.6 {1.0} | 12G | 0 |
|                     | N88.1.2 | 427.6                | 14G  | 1 | 525.8         | 24CAAACAA  | 0 | 188.7             | 16C | 1 | 352.5>351.4 {1.1} | 12G | 0 |
|                     | N88.1.3 | 427.7                | 14G  | 1 | 518.5         | 23CAAACAA  | 0 | 188.9             | 16C | 1 | 351.5>352.5 {1.1} | 12G | 0 |
|                     | N88.1.4 | 427.6                | 14G  | 1 | 518.3         | 23CAAACAA  | 0 | 188.9             | 16C | 1 | 352.5>351.5 {1.1} | 12G | 0 |
|                     | N88.1.5 | 427.5                | 14G  | 1 | 518.5         | 23CAAACAA  | 0 | 189.1             | 16C | 1 | 351.5>352.5 {1.0} | 12G | 0 |

|                      |         |                      |      |   |               |           |   |                   |     |   |                   |     |   |
|----------------------|---------|----------------------|------|---|---------------|-----------|---|-------------------|-----|---|-------------------|-----|---|
|                      | N88.1.6 | 427.7                | 14G  | 1 | 518.7         | 23CAAACAA | 0 | 188.9             | 16C | 1 | 351.4>352.5 {1.1} | 12G | 0 |
| V88/2 <sup>nd</sup>  | N272.1  | 426.6                | 13G* | 0 | 518.7         | 23CAAACAA | 0 | 188.9             | 16C | 1 | 352.5>351.5 {1.1} | 12G | 0 |
|                      | N272.2  | 426.6                | 13G  | 0 | 518.7         | 23CAAACAA | 0 | 188.8             | 16C | 1 | 351.5>352.5 {1.1} | 12G | 0 |
|                      | N272.3  | 426.6                | 13G  | 0 | 518.4         | 23CAAACAA | 0 | 188.9             | 16C | 1 | 352.5>351.5 {1.0} | 12G | 0 |
|                      | N272.4  | 426.6                | 13G  | 0 | 518.6         | 23CAAACAA | 0 | 189.0             | 16C | 1 | 351.5>352.5 {1.0} | 12G | 0 |
|                      | N272.5  | 426.6                | 13G  | 0 | 518.6         | 23CAAACAA | 0 | 188.9             | 16C | 1 | 351.5>352.5 {1.1} | 12G | 0 |
|                      | N272.6  | 426.7                | 13G  | 0 | 518.7         | 23CAAACAA | 0 | 188.9             | 16C | 1 | 351.5>352.6 {1.0} | 12G | 0 |
| V88/3 <sup>rd</sup>  | N369.1  | 427.8                | 14G  | 1 | 511.1         | 22CAAACAA | 1 | 188.9             | 16C | 1 | 351.5>352.5 {1.1} | 12G | 0 |
|                      | N369.2  | 427.8                | 14G  | 1 | 511.3         | 22CAAACAA | 1 | 189.0             | 16C | 1 | 351.5>352.6 {1.0} | 12G | 0 |
|                      | N369.3  | 427.7                | 14G  | 1 | 503.6         | 21CAAACAA | 0 | 189.2             | 16C | 1 | 351.5>350.6 {1.1} | 12G | 0 |
|                      | N369.4  | 427.7                | 14G  | 1 | 503.6         | 21CAAACAA | 0 | 189.1             | 16C | 1 | 351.5>350.6 {1.1} | 12G | 0 |
|                      | N369.5  | 427.7                | 14G  | 1 | 511.3         | 22CAAACAA | 1 | 188.9             | 16C | 1 | 352.4>351.5 {1.1} | 13G | 1 |
|                      | N369.6  | 427.7                | 14G  | 1 | 511.2         | 22CAAACAA | 1 | 189.0>188.0 {1.0} | 15C | 0 | 351.5>352.5 {1.0} | 13G | 1 |
| V88/4 <sup>th</sup>  | N449.1  | 427.7                | 14G  | 1 | 540.7<br>(13) | 26CAAACAA | 0 | 188.9             | 16C | 1 | 351.6>352.3 (1.2) | 13G | 1 |
|                      | N449.2  | 427.7                | 14G  | 1 | 533.5         | 25CAAACAA | 1 | 188.9             | 16C | 1 | 352.5>351.5 {1.1} | 13G | 1 |
|                      | N449.3  | 427.6                | 14G  | 1 | 540.7         | 26CAAACAA | 0 | 189.9             | 17C | 0 | 352.5>351.5 {1.1} | 13G | 1 |
|                      | N449.4  | 427.6                | 14G  | 1 | 540.7         | 26CAAACAA | 0 | 189.0             | 16C | 1 | 352.5>351.5 {1.1} | 13G | 1 |
|                      | N449.5  | 427.7                | 14G  | 1 | 547.7         | 27CAAACAA | 0 | 189.0             | 16C | 1 | 351.5>352.5 {1.0} | 13G | 1 |
|                      | N449.6  | 427.6                | 14G  | 1 | 533.2         | 25CAAACAA | 1 | 189.0             | 16C | 1 | 351.5>352.5 {1.1} | 13G | 1 |
|                      |         |                      |      |   |               |           |   |                   |     |   |                   |     |   |
| V138/1 <sup>st</sup> | N138.1  | 427.1>426.1<br>{1.1} | 13G  | 0 | 562.3         | 29CAAACAA | 0 | 188.9             | 16C | 1 | 349.5 (10)        | 10G | 1 |
|                      | N138.2  | 426.1>427.2<br>{1.0} | 13G  | 0 | 562.3         | 29CAAACAA | 0 | 188.9             | 16C | 1 | 349.6             | 10G | 1 |
|                      | N138.3  | 426.1                | 12G  | 0 | 561.8         | 29CAAACAA | 0 | 188.9>189.9 {1.1} | 16C | 1 | 349.7             | 10G | 1 |
|                      | N138.4  | 426.1>427.2<br>{1.0} | 13G  | 0 | 562.5         | 29CAAACAA | 0 | 188.9             | 16C | 1 | 349.5             | 10G | 1 |
|                      | N138.5  | 427.1>426.1<br>{1.1} | 13G  | 0 | 562.7         | 29CAAACAA | 0 | 188.9>189.9 {1.2} | 16C | 1 | 349.6             | 10G | 1 |
|                      | N138.6  | 426.1                | 12G  | 0 | 561.8         | 29CAAACAA | 0 | 189.0             | 16C | 1 | 349.6             | 10G | 1 |
| V138/2 <sup>nd</sup> | N288.1  | 426.0                | 12G  | 0 | 562.4         | 29CAAACAA | 0 | 188.9             | 16C | 1 | 349.4             | 10G | 1 |
|                      | N288.2  | 427.1                | 13G  | 0 | 562.6         | 29CAAACAA | 0 | 188.0>189.0 {1.1} | 15C | 0 | 349.5             | 10G | 1 |
|                      | N288.3  | 425.0                | 11G  | 1 | 562.2         | 29CAAACAA | 0 | 188.0             | 15C | 0 | 349.3             | 10G | 1 |
|                      | N288.4  | 427.1                | 13G  | 0 | 561.9         | 29CAAACAA | 0 | 188.0>188.9 {1.1} | 15C | 0 | 349.6             | 10G | 1 |
|                      | N288.5  | 426.1                | 12G  | 0 | 561.9         | 29CAAACAA | 0 | 188.0             | 15C | 0 | 349.5             | 10G | 1 |
|                      | N288.6  | 427.1                | 13G  | 0 | 561.9         | 29CAAACAA | 0 | 187.9>188.9 {1.2} | 15C | 0 | 350.6             | 11G | 0 |
| V138/3 <sup>rd</sup> | N331.1  | 427.9>426.9          | 14G* | 1 | 561.9         | 29CAAACAA | 0 | 188.9>187.9 {1.1} | 15C | 0 | 348.2 (9)         | 9G  | 0 |

|                      |          |                      |     |   |       |            |   |                   |     |   |            |     |   |
|----------------------|----------|----------------------|-----|---|-------|------------|---|-------------------|-----|---|------------|-----|---|
|                      |          | {1.2}                |     |   |       |            |   |                   |     |   |            |     |   |
|                      | N331.2   | 426.0>427.0<br>{1.1} | 13G | 0 | 576.1 | 31CAAACAA  | 1 | 188.9>189.8 {1.2} | 16C | 1 | 349.5      | 10G | 1 |
|                      | N331.3   | 426>427 {1.1}        | 13G | 0 | 575.9 | 31CAAACAA  | 1 | 187.9>188.9 {1.1} | 15C | 0 | 349.5      | 10G | 1 |
|                      | N331.4   | 427.0>426.0<br>{1.2} | 13G | 0 | 575.9 | 31CAAACAA  | 1 | 188.9>187.9 {1.2} | 16C | 1 | 349.6      | 10G | 1 |
|                      | N331.5   | 426.0>427.1<br>(1.0) | 13G | 0 | 576.3 | 31CAAACAA  | 1 | 187.8>188.9 {1.1} | 15C | 0 | 349.4      | 10G | 1 |
|                      | N331.6   | 426.0>427.0<br>{1.1} | 13G | 0 | 576.3 | 31CAAACAA  | 1 | 188.9>189.8 {1.2} | 16C | 1 | 348.4      | 9G  | 0 |
| V138/4 <sup>th</sup> | Replaced |                      |     |   |       |            |   |                   |     |   |            |     |   |
| <b>cc167</b>         |          |                      |     |   |       |            |   |                   |     |   |            |     |   |
| V124/1 <sup>st</sup> | N124.1   | 420.7 (11)           | 11G | 1 | 484.2 | 18CAAACAA* | 0 | 187.1             | 11C | 0 | 349.3 (10) | 10G | 1 |
|                      | N124.2   | 420.7                | 11G | 1 | 484.3 | 18CAAACAA  | 0 | 187.0             | 11C | 0 | 349.3      | 10G | 1 |
|                      | N124.3   | 420.7                | 11G | 1 | 484.2 | 18CAAACAA  | 0 | 187.1             | 11C | 0 | 349.3      | 10G | 1 |
|                      | N124.4   | 420.7                | 11G | 1 | 484.2 | 18CAAACAA  | 0 | 187.0             | 11C | 0 | 349.3      | 10G | 1 |
|                      | N124.5   | 420.6                | 11G | 1 | 484.1 | 18CAAACAA  | 0 | 187.1             | 11C | 0 | 349.3      | 10G | 1 |
|                      | N124.6   | 420.6                | 11G | 1 | 484.1 | 18CAAACAA* | 0 | 186.9             | 11C | 0 | 349.3      | 10G | 1 |
| V124/2 <sup>nd</sup> | N290.1   | 420.7                | 11G | 1 | 484.3 | 18CAAACAA  | 0 | 187.1             | 11C | 0 | 349.3      | 10G | 1 |
|                      | N290.2   | 420.8                | 11G | 1 | 484.2 | 18CAAACAA  | 0 | 187.0             | 11C | 0 | 349.4      | 10G | 1 |
|                      | N290.3   | 420.8                | 11G | 1 | 484.3 | 18CAAACAA  | 0 | 187.1             | 11C | 0 | 349.4      | 10G | 1 |
|                      | N290.4   | 420.8                | 11G | 1 | 491.1 | 19CAAACAA  | 1 | 187.0             | 11C | 0 | 349.3      | 10G | 1 |
|                      | N290.5   | 420.7                | 11G | 1 | 484.2 | 18CAAACAA  | 0 | 187.1             | 11C | 0 | 349.3      | 10G | 1 |
|                      | N290.6   | 420.7                | 11G | 1 | 484.2 | 18CAAACAA  | 0 | 187.0             | 11C | 0 | 349.3      | 10G | 1 |
| V124/3 <sup>rd</sup> | N336.1   | 420.6 (11)           | 11G | 1 | 484.2 | 18CAAACAA  | 0 | 187.1             | 11C | 0 | 349.3 (10) | 10G | 1 |
|                      | N336.2   | 420.7                | 11G | 1 | 506.3 | 21CAAACAA  | 0 | 187.0             | 11C | 0 | 349.3      | 10G | 1 |
|                      | N336.3   | 420.7                | 11G | 1 | 484.3 | 18CAAACAA  | 0 | 187.1             | 11C | 0 | 349.3      | 10G | 1 |
|                      | N336.4   | 420.7                | 11G | 1 | 484.2 | 18CAAACAA  | 0 | 186.9             | 11C | 0 | 349.3      | 10G | 1 |
|                      | N336.5   | 420.7                | 11G | 1 | 484.3 | 18CAAACAA  | 0 | 187.1             | 11C | 0 | 349.3      | 10G | 1 |
|                      | N336.6   | 420.8                | 11G | 1 | 484.2 | 18CAAACAA  | 0 | 186.9             | 11C | 0 | 349.4      | 10G | 1 |
| V64/1 <sup>st</sup>  | N64.1    | 420.6 (11)           | 11G | 1 | 484.2 | 18CAAACAA  | 0 | 187.0             | 11C | 0 | 349.3 (10) | 10G | 1 |
|                      | N64.2    | 420.6                | 11G | 1 | 484.1 | 18CAAACAA  | 0 | 186.9             | 11C | 0 | 349.3      | 10G | 1 |
|                      | N64.3    | 420.7                | 11G | 1 | 484.2 | 18CAAACAA  | 0 | 187.0             | 11C | 0 | 349.3      | 10G | 1 |
|                      | N64.4    | 420.7                | 11G | 1 | 484.2 | 18CAAACAA  | 0 | 186.9             | 11C | 0 | 349.3      | 10G | 1 |
|                      | N64.5    | 420.7                | 11G | 1 | 484.2 | 18CAAACAA  | 0 | 187.1             | 11C | 0 | 349.3      | 10G | 1 |
|                      | N64.6    | 420.7                | 11G | 1 | 484.3 | 18CAAACAA  | 0 | 186.9             | 11C | 0 | 349.3      | 10G | 1 |



|                     |             |           |        |     |               |            |   |                   |      |   |            |      |   |
|---------------------|-------------|-----------|--------|-----|---------------|------------|---|-------------------|------|---|------------|------|---|
| V69/2 <sup>nd</sup> | N258.1      | 417.1 (8) | 8G*    | 1   | 444.1<br>(12) | 12CAAACAA* | 0 | 187.4>188.4 {1.1} | 16C* | 1 | 347.1      | 10G* | 1 |
|                     | N258.2      | 417.0     | 8G     | 1   | 444.4         | 12CAAACAA  | 0 | 187.5>188.4 {1.1} | 16C  | 1 | 347.2      | 10G  | 1 |
|                     | N258.3      | 417.2     | 8G     | 1   | 444.2         | 12CAAACAA  | 0 | 187.4>188.4 {1.1} | 16C  | 1 | 347.1      | 10G  | 1 |
|                     | N258.4      | 417.1     | 8G     | 1   | 444.0         | 12CAAACAA  | 0 | 187.4>188.4 {1.2} | 16C  | 1 | 347.1      | 10G  | 1 |
|                     | N258.5      | 417.4     | 8G     | 1   | 444.1         | 12CAAACAA  | 0 | 187.3>188.2 {1.2} | 16C  | 1 | 347.3      | 10G  | 1 |
|                     | N258.6      | 417.1     | 8G     | 1   | 444.1         | 12CAAACAA  | 0 | 187.4>188.4 {1.0} | 16C  | 1 | 347.2      | 10G  | 1 |
| V69/3 <sup>rd</sup> | No sample   |           |        |     |               |            |   |                   |      |   |            |      |   |
| V69/4 <sup>th</sup> | N431.1      | 417.4 (8) | 8G     | 1   | 444.3<br>(12) | 12CAAACAA  | 0 | 187.5>188.6 {1.2} | 16C* | 1 | 347.2 (10) | 10G  | 1 |
|                     | N431.2      | 417.3     | 8G     | 1   | 444.3         | 12CAAACAA  | 0 | 187.5>188.6 {1.1} | 16C  | 1 | 347.2      | 10G  | 1 |
|                     | N431.3      | 417.5     | 8G     | 1   | 444.2         | 12CAAACAA  | 0 | 187.6>188.5 {1.2} | 16C  | 1 | 347.3      | 10G  | 1 |
|                     | N431.4      | 417.3     | 8G     | 1   | 444.4         | 12CAAACAA  | 0 | 187.6>188.6 {1.1} | 16C  | 1 | 347.2      | 10G  | 1 |
|                     | N431.5      | 417.3     | 8G     | 1   | 444.4         | 12CAAACAA  | 0 | 187.5>188.5 {1.2} | 16C  | 1 | 347.2      | 10G  | 1 |
|                     | N431.6      | 417.2     | 8G     | 1   | 444.4         | 12CAAACAA  | 0 | 187.5>188.5 {1.1} | 16C  | 1 | 347.3      | 10G  | 1 |
|                     |             |           |        |     |               |            |   |                   |      |   |            |      |   |
| V93/1 <sup>st</sup> | Non-carrier |           |        |     |               |            |   |                   |      |   |            |      |   |
| V93/2 <sup>nd</sup> | N264.1      | 424.0     | 15G*?? | 1?? | 445.6<br>(11) | 12CAAACAA  | 0 | 189.9             | 16C  | 1 | 349.4 (10) | 10G  | 1 |
|                     | N264.2      | 424.0     | 14G    | 1   | 445.5         | 12CAAACAA  | 0 | 189.8             | 16C  | 1 | 349.5      | 10G  | 1 |
|                     | N264.3      | 425.0     | 15G    | 0   | 438.7         | 11CAAACAA  | 0 | 189.9             | 16C  | 1 | 349.4      | 10G  | 1 |
|                     | N264.4      | 423.8     | 14G*   | 1   | 445.5         | 12CAAACAA  | 0 | 189.9             | 16C  | 1 | 349.5      | 10G  | 1 |
|                     | N264.5      | 423.7     | 14G    | 1   | 445.4         | 12CAAACAA  | 0 | 189.9             | 16C  | 1 | 349.4      | 10G  | 1 |
|                     | N264.6      | 424.3     | 15G    | 0   | 445.4         | 12CAAACAA  | 0 | 189.9             | 16C  | 1 | 349.4      | 10G  | 1 |
| V93/3 <sup>rd</sup> | N359.1      | 425.4     | 16G*   | 0   | 445.5         | 12CAAACAA  | 0 | 190.9             | 17C  | 0 | 349.4      | 10G  | 1 |
|                     | N359.2      | 425.4     | 16G    | 0   | 445.6         | 12CAAACAA  | 0 | 190.9             | 17C  | 0 | 349.4      | 10G  | 1 |
|                     | N359.3      | 425.3     | 16G    | 0   | 445.4         | 12CAAACAA  | 0 | 190.9             | 17C  | 0 | 349.4      | 10G  | 1 |
|                     | N359.4      | 425.2     | 16G    | 0   | 445.4         | 12CAAACAA  | 0 | 190.9             | 17C  | 0 | 349.4      | 10G  | 1 |
|                     | N359.5      | 425.3     | 16G    | 0   | 452.1         | 13CAAACAA  | 1 | 189.9             | 16C  | 1 | 349.5      | 10G  | 1 |
|                     | N359.6      | 425.3     | 16G    | 0   | 445.5         | 12CAAACAA  | 0 | 190.9             | 17C  | 0 | 349.4      | 10G  | 1 |
|                     |             |           |        |     |               |            |   |                   |      |   |            |      |   |
| V96/1 <sup>st</sup> | Non-carrier |           |        |     |               |            |   |                   |      |   |            |      |   |
| V96/2 <sup>nd</sup> | N259.1      | 417.3 (8) | 8G*    | 1   | 445.5<br>(12) | 12CAAACAA* | 0 | 185.1             | 11C  | 0 | 349.4 (10) | 10G* | 1 |
|                     | N259.2      | 417.4     | 8G     | 1   | 445.5         | 12CAAACAA  | 0 | 185.0             | 11C  | 0 | 349.5      | 10G  | 1 |
|                     | N259.3      | 417.5     | 8G     | 1   | 445.5         | 12CAAACAA  | 0 | 185.1             | 11C  | 0 | 349.5      | 10G  | 1 |
|                     | N259.4      | 417.4     | 8G     | 1   | 445.5         | 12CAAACAA  | 0 | 184.9             | 11C  | 0 | 349.4      | 10G  | 1 |

|                      |        |           |    |   |               |           |   |               |     |   |                   |     |   |
|----------------------|--------|-----------|----|---|---------------|-----------|---|---------------|-----|---|-------------------|-----|---|
|                      |        |           |    |   |               |           |   | (13)          |     |   |                   |     |   |
|                      | N259.5 | 417.4     | 8G | 1 | 445.5         | 12CAAACAA | 0 | 185.1         | 11C | 0 | 349.4             | 10G | 1 |
|                      | N259.6 | 417.4     | 8G | 1 | 445.5         | 12CAAACAA | 0 | 184.9         | 11C | 0 | 349.4             | 10G | 1 |
| V96/3 <sup>rd</sup>  | N370.1 | 417.3     | 8G | 1 | 445.5         | 12CAAACAA | 0 | 185.1         | 11C | 0 | 348.5             | 9G  | 0 |
|                      | N370.2 | 417.3     | 8G | 1 | 445.4         | 12CAAACAA | 0 | 185.0<br>(10) | 11C | 0 | 348.4             | 9G  | 0 |
|                      | N370.3 | 417.4     | 8G | 1 | 445.4         | 12CAAACAA | 0 | 185.1         | 11C | 0 | 351.4             | 12G | 0 |
|                      | N370.4 | 417.5     | 8G | 1 | 445.6         | 12CAAACAA | 0 | 185.0         | 11C | 0 | 349.4>350.4 {1.2} | 10G | 1 |
|                      | N370.5 | 417.5     | 8G | 1 | 445.5         | 12CAAACAA | 0 | 185.1         | 11C | 0 | 348.4             | 9G  | 0 |
|                      | N370.6 | 417.5     | 8G | 1 | 445.6         | 12CAAACAA | 0 | 185.0         | 11C | 0 | 348.4             | 9G  | 0 |
| V96/4 <sup>th</sup>  | N445.1 | 417.5 (8) | 8G | 1 | 445.5<br>(11) | 12CAAACAA | 0 | 185.2         | 11C | 0 | 348.4 (9)         | 9G  | 0 |
|                      | N445.2 | 417.4     | 8G | 1 | 445.5         | 12CAAACAA | 0 | 185.3         | 11C | 0 | 348.5             | 9G  | 0 |
|                      | N445.3 | 417.4     | 8G | 1 | 445.5         | 12CAAACAA | 0 | 185.3         | 11C | 0 | 348.5             | 9G  | 0 |
|                      | N445.4 | 417.4     | 8G | 1 | 445.5         | 12CAAACAA | 0 | 185.2         | 11C | 0 | 348.5             | 9G  | 0 |
|                      | N445.5 | 417.4     | 8G | 1 | 445.5         | 12CAAACAA | 0 | 185.1         | 11C | 0 | 348.5             | 9G  | 0 |
|                      | N445.6 | 417.4     | 8G | 1 | 445.6         | 12CAAACAA | 0 | 185.1         | 11C | 0 | 349.4             | 10G | 1 |
|                      |        |           |    |   |               |           |   |               |     |   |                   |     |   |
| V222/1 <sup>st</sup> | N222.1 | 417.4 (8) | 8G | 1 | 445.6<br>(12) | 12CAAACAA | 0 | 190.0         | 16C | 1 | 349.5             | 10G | 1 |
|                      | N222.2 | 417.4     | 8G | 1 | 445.5         | 12CAAACAA | 0 | 190.0         | 16C | 1 | 349.5             | 10G | 1 |
|                      | N222.3 | 417.4     | 8G | 1 | 445.4         | 12CAAACAA | 0 | 190.0         | 16C | 1 | 349.4             | 10G | 1 |
|                      | N222.4 | 417.4     | 8G | 1 | 445.5         | 12CAAACAA | 0 | 190.0         | 16C | 1 | 349.4             | 10G | 1 |
|                      | N222.5 | 417.4     | 8G | 1 | 445.5         | 12CAAACAA | 0 | 190.0         | 16C | 1 | 349.4             | 10G | 1 |
|                      | N222.6 | 417.4     | 8G | 1 | 445.5         | 12CAAACAA | 0 | 189.9         | 16C | 1 | 349.5             | 10G | 1 |
| V222/2 <sup>nd</sup> | N309.1 | 417.4     | 8G | 1 | 445.5         | 12CAAACAA | 0 | 189.9         | 16C | 1 | 349.4             | 10G | 1 |
|                      | N309.2 | 417.4     | 8G | 1 | 445.6         | 12CAAACAA | 0 | 189.9         | 16C | 1 | 349.4             | 10G | 1 |
|                      | N309.3 | 417.2     | 8G | 1 | 445.5         | 12CAAACAA | 0 | 189.9         | 16C | 1 | 349.4             | 10G | 1 |
|                      | N309.4 | 417.3     | 8G | 1 | 445.5         | 12CAAACAA | 0 | 189.9         | 16C | 1 | 349.3             | 10G | 1 |
|                      | N309.5 | 417.1     | 8G | 1 | 445.5         | 12CAAACAA | 0 | 190.0         | 16C | 1 | 349.4             | 10G | 1 |
|                      | N309.6 | 417.2     | 8G | 1 | 445.4         | 12CAAACAA | 0 | 190.0         | 16C | 1 | 349.4             | 10G | 1 |
| V222/3 <sup>rd</sup> | N391.1 | 417.3     | 8G | 1 | 445.5         | 12CAAACAA | 0 | 189.1         | 15C | 0 | 349.5             | 10G | 1 |
|                      | N391.2 | 417.4     | 8G | 1 | 445.5         | 12CAAACAA | 0 | 189.0         | 15C | 0 | 349.5             | 10G | 1 |
|                      | N391.3 | 417.4     | 8G | 1 | 445.6         | 12CAAACAA | 0 | 189.0         | 15C | 0 | 349.5             | 10G | 1 |
|                      | N391.4 | 417.4     | 8G | 1 | 445.5         | 12CAAACAA | 0 | 189.0         | 15C | 0 | 349.4             | 10G | 1 |
|                      | N391.5 | 417.4     | 8G | 1 | 445.5         | 12CAAACAA | 0 | 189.0         | 15C | 0 | 349.4             | 10G | 1 |
|                      | N391.6 | 417.4     | 8G | 1 | 445.5         | 12CAAACAA | 0 | 189.0         | 15C | 0 | 349.4             | 10G | 1 |

|                      |        |                      |      |   |               |           |   |        |     |   |            |      |   |
|----------------------|--------|----------------------|------|---|---------------|-----------|---|--------|-----|---|------------|------|---|
| V222/4 <sup>th</sup> | N459.1 | 417.4 (8)            | 8G   | 1 | 445.5<br>(11) | 12CAAACAA | 0 | 189.0  | 15C | 0 | 349.5 (10) | 10G  | 1 |
|                      | N459.2 | 417.3                | 8G   | 1 | 452.1         | 13CAAACAA | 1 | 189.1  | 15C | 0 | 349.4      | 10G  | 1 |
|                      | N459.3 | 417.3                | 8G   | 1 | 445.4         | 12CAAACAA | 0 | 189.0  | 15C | 0 | 349.5      | 10G  | 1 |
|                      | N459.4 | 417.3                | 8G   | 1 | 445.4         | 12CAAACAA | 0 | 189.0  | 15C | 0 | 349.5      | 10G  | 1 |
|                      | N459.5 | 417.4                | 8G   | 1 | 458.3         | 14CAAACAA | 0 | 189.0  | 15C | 0 | 349.4      | 10G  | 1 |
|                      | N459.6 | 417.4                | 8G   | 1 | 445.5         | 12CAAACAA | 0 | 189.0  | 15C | 0 | 349.4      | 10G  | 1 |
| <b>cc60</b>          |        |                      |      |   |               |           |   |        |     |   |            |      |   |
| V114/1 <sup>st</sup> | N114.1 | 424.1                | 14G* | 1 | 464.6<br>(12) | 15CAAACAA | 0 | Absent |     |   | 430.7      | 13G  | 1 |
|                      | N114.2 | 424.3                | 14G  | 1 | 464.7         | 15CAAACAA | 0 | Absent |     |   | 430.7      | 13G  | 1 |
|                      | N114.3 | 424.3                | 14G  | 1 | 464.7         | 15CAAACAA | 0 | Absent |     |   | 430.7      | 13G  | 1 |
|                      | N114.4 | 424.3                | 14G  | 1 | 464.7         | 15CAAACAA | 0 | Absent |     |   | 430.7      | 13G  | 1 |
|                      | N114.5 | 424.2>423.2<br>{1.2} | 14G  | 1 | 464.7         | 15CAAACAA | 0 | Absent |     |   | 430.7      | 13G  | 1 |
|                      | N114.6 | 424.2                | 14G  | 1 | 464.7         | 15CAAACAA | 0 | Absent |     |   | 430.7      | 13G  | 1 |
| V114/2 <sup>nd</sup> | N283.1 | 424.4                | 14G  | 1 | 464.2         | 15CAAACAA | 0 | Absent |     |   | 430.8      | 13G  | 1 |
|                      | N283.2 | 424.4                | 14G  | 1 | 464.6         | 15CAAACAA | 0 | Absent |     |   | 430.7      | 13G  | 1 |
|                      | N283.3 | 425.2>424.3<br>[1.2] | 15G  | 0 | 464.7         | 15CAAACAA | 0 | Absent |     |   | 430.8      | 13G  | 1 |
|                      | N283.4 | 424.4                | 14G  | 1 | 464.6         | 15CAAACAA | 0 | Absent |     |   | 430.7      | 13G  | 1 |
|                      | N283.5 | 425.5                | 15G  | 0 | 464.3         | 15CAAACAA | 0 | Absent |     |   | 430.7      | 13G  | 1 |
|                      | N283.6 | 424.4                | 14G  | 1 | 464.2         | 15CAAACAA | 0 | Absent |     |   | 430.7      | 13G  | 1 |
| V114/3 <sup>rd</sup> | N330.1 | 420.2 (10)           | 10G  | 0 | 464.7<br>(12) | 15CAAACAA | 0 | Absent |     |   | 427.5      | 11G  | 0 |
|                      | N330.2 | 420.2                | 10G  | 0 | 464.5         | 15CAAACAA | 0 | Absent |     |   | 427.8      | 11G  | 0 |
|                      | N330.3 | 420.1                | 10G  | 0 | 464.6         | 15CAAACAA | 0 | Absent |     |   | 429.7      | 12G  | 0 |
|                      | N330.4 | 420.1                | 10G  | 0 | 464.6         | 15CAAACAA | 0 | Absent |     |   | 428.6      | 11G  | 0 |
|                      | N330.5 | 420.3                | 10G  | 0 | 464.7         | 15CAAACAA | 0 | Absent |     |   | 433.3??    | 13G* | 1 |
|                      | N330.6 | 420.4                | 10G  | 0 | 464.7         | 15CAAACAA | 0 | Absent |     |   | 428.5      | 12G  | 0 |
| V134/1 <sup>st</sup> | N134.1 | 424.1                | 14G  | 1 | 464.7<br>(10) | 15CAAACAA | 0 | Absent |     |   | 430.7      | 13G  | 1 |
|                      | N134.2 | 424.4                | 14G  | 1 | 464.7         | 15CAAACAA | 0 | Absent |     |   | 430.7      | 13G  | 1 |
|                      | N134.3 | 424.5                | 14G  | 1 | 464.7         | 15CAAACAA | 0 | Absent |     |   | 430.7      | 13G  | 1 |
|                      | N134.4 | 424.5                | 14G  | 1 | 464.6         | 15CAAACAA | 0 | Absent |     |   | 430.8      | 13G  | 1 |
|                      | N134.5 | 424.2                | 14G  | 1 | 464.7         | 15CAAACAA | 0 | Absent |     |   | 430.8      | 13G  | 1 |



|                      |        |                      |     |   |               |            |   |        |  |  |                   |      |   |
|----------------------|--------|----------------------|-----|---|---------------|------------|---|--------|--|--|-------------------|------|---|
| V113/1 <sup>st</sup> | N113.1 | 424.0                | 14G | 1 | 464.2         | 15CAAACAA* | 0 | Absent |  |  | 428.5             | 12G  | 0 |
|                      | N113.2 | 424.1                | 14G | 1 | 464.3         | 15CAAACAA  | 0 | Absent |  |  | 429.9             | 13G  | 1 |
|                      | N113.3 | 424.1                | 14G | 1 | 464.7         | 15CAAACAA  | 0 | Absent |  |  | 429.5             | 13G  | 1 |
|                      | N113.4 | 424.1                | 14G | 1 | 464.7         | 15CAAACAA  | 0 | Absent |  |  | 429.7             | 13G  | 1 |
|                      | N113.5 | 424.1                | 14G | 1 | 464.7         | 15CAAACAA  | 0 | Absent |  |  | 429.7             | 13G  | 1 |
|                      | N113.6 | 424.2>423.2<br>{1.2} | 14G | 1 | 464.7         | 15CAAACAA  | 0 | Absent |  |  | 430.0             | 13G  | 1 |
| V113/2 <sup>nd</sup> | N281.1 | 424.1                | 14G | 1 | 464.6         | 15CAAACAA  | 0 | Absent |  |  | 429.4             | 13G* | 1 |
|                      | N281.2 | 424.2                | 14G | 1 | 464.6         | 15CAAACAA  | 0 | Absent |  |  | 429.8>428.8 {1.2} | 13G  | 1 |
|                      | N281.3 | 424.1                | 14G | 1 | 464.7         | 15CAAACAA  | 0 | Absent |  |  | 429.9             | 13G  | 1 |
|                      | N281.4 | 423.1                | 13G | 0 | 464.5         | 15CAAACAA  | 0 | Absent |  |  | 430.0             | 13G  | 1 |
|                      | N281.5 | 423.9                | 14G | 1 | 464.6         | 15CAAACAA  | 0 | Absent |  |  | 429.6             | 13G  | 1 |
|                      | N281.6 | 423.9                | 14G | 1 | 464.3         | 15CAAACAA  | 0 | Absent |  |  | 430.1             | 13G  | 1 |
|                      |        |                      |     |   |               |            |   |        |  |  |                   |      |   |
| V115/1 <sup>st</sup> | N115.1 | 424.1                | 14G | 1 | 464.7         | 15CAAACAA  | 0 | Absent |  |  | 429.7             | 13G  | 1 |
|                      | N115.2 | 424.2>423.2<br>{1.2} | 14G | 1 | 464.7         | 15CAAACAA  | 0 | Absent |  |  | 430.2             | 13G  | 1 |
|                      | N115.3 | 424.2                | 14G | 1 | 464.7         | 15CAAACAA  | 0 | Absent |  |  | 429.7             | 13G  | 1 |
|                      | N115.4 | 424.3                | 14G | 1 | 464.7         | 15CAAACAA  | 0 | Absent |  |  | 430.0             | 13G  | 1 |
|                      | N115.5 | 424.0>423.0<br>{1.1} | 14G | 1 | 464.7         | 15CAAACAA  | 0 | Absent |  |  | 429.9>428.9 {1.2} | 13G  | 1 |
|                      | N115.6 | 424.1>423.1<br>{1.2} | 14G | 1 | 464.6         | 15CAAACAA  | 0 | Absent |  |  | 430.2             | 13G  | 1 |
| V115/2 <sup>nd</sup> | N282.1 | 423.9                | 14G | 1 | 464.3         | 15CAAACAA  | 0 | Absent |  |  | 429.6             | 13G  | 1 |
|                      | N282.2 | 424.0>422.9<br>{1.2} | 14G | 1 | 464.2         | 15CAAACAA  | 0 | Absent |  |  | 430.1             | 13G  | 1 |
|                      | N282.3 | 424.0                | 14G | 1 | 464.3         | 15CAAACAA  | 0 | Absent |  |  | 430.0             | 13G  | 1 |
|                      | N282.4 | 424.1                | 14G | 1 | 464.4         | 15CAAACAA  | 0 | Absent |  |  | 429.6             | 13G  | 1 |
|                      | N282.5 | 424.2                | 14G | 1 | 464.5         | 15CAAACAA  | 0 | Absent |  |  | 429.7             | 13G  | 1 |
|                      | N282.6 | 424.2                | 14G | 1 | 464.4         | 15CAAACAA  | 0 | Absent |  |  | 430.0             | 13G  | 1 |
|                      |        |                      |     |   |               |            |   |        |  |  |                   |      |   |
| <b>cc32</b>          |        |                      |     |   |               |            |   |        |  |  |                   |      |   |
| V176/1 <sup>st</sup> | N176.1 | 429.8                | 16G | 0 | 533.6<br>(14) | 24CAAACAA  | 1 | Absent |  |  | 354.5             | 15G  | 0 |
|                      | N176.2 | 429.9                | 16G | 0 | 511.1         | 21CAAACAA  | 1 | Absent |  |  | 354.5             | 15G  | 0 |
|                      | N176.3 | 429.9                | 16G | 0 | 511.2         | 21CAAACAA  | 1 | Absent |  |  | 354.5             | 15G  | 0 |
|                      | N176.4 | 429.9                | 16G | 0 | 526.0         | 23CAAACAA  | 0 | Absent |  |  | 354.6             | 15G  | 0 |
|                      | N176.5 | 429.9                | 16G | 0 | 525.7         | 23CAAACAA  | 0 | Absent |  |  | 354.5             | 15G  | 0 |

|                      |        |       |     |   |               |           |   |        |  |  |       |     |   |
|----------------------|--------|-------|-----|---|---------------|-----------|---|--------|--|--|-------|-----|---|
|                      | N176.6 | 429.9 | 16G | 0 | 511.3         | 21CAAACAA | 1 | Absent |  |  | 354.5 | 15G | 0 |
| V176/2 <sup>nd</sup> | N318.1 | 430.1 | 16G | 0 | 533.7         | 24CAAACAA | 1 | Absent |  |  | 355.4 | 16G | 1 |
|                      | N318.2 | 430.1 | 16G | 0 | 525.9         | 23CAAACAA | 0 | Absent |  |  | 355.5 | 16G | 1 |
|                      | N318.3 | 430.2 | 16G | 0 | 533.3         | 24CAAACAA | 1 | Absent |  |  | 355.5 | 16G | 1 |
|                      | N318.4 | 430.2 | 16G | 0 | 533.6         | 24CAAACAA | 1 | Absent |  |  | 355.4 | 16G | 1 |
|                      | N318.5 | 430.3 | 16G | 0 | 526.0         | 23CAAACAA | 0 | Absent |  |  | 355.6 | 16G | 1 |
|                      | N318.6 | 430.1 | 16G | 0 | 525.9         | 23CAAACAA | 0 | Absent |  |  | 355.4 | 16G | 1 |
| V176/3 <sup>rd</sup> | N399.1 | 429.9 | 16G | 0 | 541.1         | 25CAAACAA | 0 | Absent |  |  | 354.6 | 15G | 0 |
|                      | N399.2 | 428.9 | 15G | 0 | 533.5         | 24CAAACAA | 1 | Absent |  |  | 354.5 | 15G | 0 |
|                      | N399.3 | 428.9 | 15G | 0 | 449.8         | 12CAAACAA | 1 | Absent |  |  | 354.5 | 15G | 0 |
|                      | N399.4 | 428.9 | 15G | 0 | 540.5         | 25CAAACAA | 0 | Absent |  |  | 354.6 | 15G | 0 |
|                      | N399.5 | 429.9 | 16G | 0 | 533.1         | 24CAAACAA | 1 | Absent |  |  | 354.5 | 15G | 0 |
|                      | N399.6 | 429.9 | 16G | 0 | 541.0         | 25CAAACAA | 0 | Absent |  |  | 354.5 | 15G | 0 |
| V176/4 <sup>th</sup> | N408.1 | 429.0 | 15G | 0 | 533.6<br>(12) | 24CAAACAA | 1 | Absent |  |  | 353.5 | 14G | 0 |
|                      | N408.2 | 429.2 | 15G | 0 | 540.7         | 25CAAACAA | 0 | Absent |  |  | 353.5 | 14G | 0 |
|                      | N408.3 | 429.1 | 15G | 0 | 533.4         | 24CAAACAA | 1 | Absent |  |  | 353.7 | 14G | 0 |
|                      | N408.4 | 429.2 | 15G | 0 | 533.8         | 24CAAACAA | 1 | Absent |  |  | 353.5 | 14G | 0 |
|                      | N408.5 | 429.2 | 15G | 0 | 540.5         | 25CAAACAA | 0 | Absent |  |  | 353.5 | 14G | 0 |
|                      | N408.6 | 429.1 | 15G | 0 | 533.4         | 24CAAACAA | 1 | Absent |  |  | 353.4 | 14G | 0 |

<sup>1</sup>Fragments sizes were determined using either a GS600LIZ (black type) or GS500LIZ (blue type) size standard; numbers in curly brackets indicate the ratio between the PCR fragment sizes where two obvious peaks were observed (where double peaks were observed, a ratio of >1.2 was utilised as a cut-off with the highest peak height being used to determine repeat number, if the ratio was <1.2 then the larger peak in bp was utilised to determine repeat number except in the cases of *pgII* and *pgIH* where sequencing indicated that the these double peaks followed the following rules 191/192, 17; 190/191, 16; 189/190, 15; 188/189, 14; 187/188, 14; 186/187, 13; 185/186, 12). <sup>2</sup>an asterisk indicates that the PCR fragment was sequenced by dideoxy sequencing and the repeat number determined by visual inspection of the trace file. <sup>3</sup>Expression states, 1=1, 0=0 (all genes are subject to translational phase variation).

Supplementary Data Table III. Repeat numbers and expression states for the phase-variable restriction-modification genes

| Volunteer /time pt  | Isolate | Phase Variable Gene |                    |                         |                   |                    |                         |
|---------------------|---------|---------------------|--------------------|-------------------------|-------------------|--------------------|-------------------------|
|                     |         | <i>modA</i>         |                    |                         | <i>modB</i>       |                    |                         |
|                     |         | Size <sup>1</sup>   | Tract <sup>2</sup> | Exp. State <sup>3</sup> | Size <sup>1</sup> | Tract <sup>2</sup> | Exp. State <sup>3</sup> |
| <b>cc174</b>        |         |                     |                    |                         |                   |                    |                         |
| V43/1 <sup>st</sup> | N43.1.1 | 198.2               | 3AGCC              | 0                       | 439.0             | 16GCCAA            | 1                       |
|                     | N43.1.2 | 198.2               | 3AGCC*             | 0                       | 439.1             | 16GCCAA            | 1                       |
|                     | N43.1.3 | 198.3               | 3AGCC              | 0                       | 439.1             | 16GCCAA            | 1                       |
|                     | N43.1.4 | 198.3               | 3AGCC              | 0                       | 438.7             | 16GCCAA            | 1                       |
|                     | N43.1.5 | 198.3               | 3AGCC              | 0                       | 438.7             | 16GCCAA            | 1                       |
|                     | N43.1.6 | 198.2               | 3AGCC              | 0                       | 457.7             | 20GCCAA            | 0                       |
| V43/2 <sup>nd</sup> | N241.1  | 198.4               | 3AGCC              | 0                       | 443.7             | 17GCCAA            | 0                       |
|                     | N241.2  | 198.3               | 3AGCC              | 0                       | 443.6             | 17GCCAA*           | 0                       |
| V43/3 <sup>rd</sup> | N349.1  | 199.7               | 3AGCC*             | 0                       | 438.7             | 16GCCAA            | 1                       |
|                     | N349.2  | 198.3               | 3AGCC              | 0                       | 438.8             | 16GCCAA            | 1                       |
|                     | N349.3  | 198.3               | 3AGCC              | 0                       | 438.7             | 16GCCAA            | 1                       |
|                     | N349.4  | 198.4               | 3AGCC              | 0                       | 438.9             | 16GCCAA            | 1                       |
|                     | N349.5  | 198.3               | 3AGCC              | 0                       | 439.4             | 16GCCAA            | 1                       |
|                     | N349.6  | 198.2               | 3AGCC              | 0                       | 438.6             | 16GCCAA            | 1                       |
| V43/4 <sup>th</sup> | Cleared |                     |                    |                         |                   |                    |                         |
|                     |         |                     |                    |                         |                   |                    |                         |
| V51/1 <sup>st</sup> | N51.1   | 198.3               | 3AGCC              | 0                       | 443.8             | 17GCCAA            | 0                       |
|                     | N51.2   | 198.3               | 3AGCC              | 0                       | 443.6             | 17GCCAA            | 0                       |
|                     | N51.3   | 198.3               | 3AGCC              | 0                       | 443.8             | 17GCCAA            | 0                       |
|                     | N51.4   | 198.5               | 3AGCC              | 0                       | 444.0             | 17GCCAA            | 0                       |
|                     | N51.5   | 198.3               | 3AGCC              | 0                       | 443.7             | 17GCCAA            | 0                       |
|                     | N51.6   | 198.3               | 3AGCC              | 0                       | 444.0             | 17GCCAA            | 0                       |
| V51/2 <sup>nd</sup> | N236.1  | 198.3               | 3AGCC              | 0                       | 443.8             | 17GCCAA            | 0                       |
|                     | N236.2  | 198.4               | 3AGCC              | 0                       | 438.2             | 16GCCAA            | 1                       |
|                     | N236.3  | 198.4               | 3AGCC              | 0                       | 438.8             | 16GCCAA            | 1                       |
|                     | N236.4  | 198.3               | 3AGCC              | 0                       | 438.8             | 16GCCAA            | 1                       |
|                     | N236.5  | 198.3               | 3AGCC              | 0                       | 444.0             | 17GCCAA            | 0                       |
|                     | N236.6  | 198.3               | 3AGCC              | 0                       | 444.0             | 17GCCAA            | 0                       |
| V51/3 <sup>rd</sup> | N354.1  | 198.3               | 3AGCC              | 0                       | 444.0             | 17GCCAA            | 0                       |
|                     | N354.2  | 198.2               | 3AGCC              | 0                       | 444.0             | 17GCCAA            | 0                       |
|                     | N354.3  | 198.2               | 3AGCC              | 0                       | 444.1             | 17GCCAA            | 0                       |
|                     | N354.4  | 198.2               | 3AGCC              | 0                       | 444.1             | 17GCCAA            | 0                       |

|                     |         |       |       |   |            |         |   |
|---------------------|---------|-------|-------|---|------------|---------|---|
|                     | N354.5  | 198.3 | 3AGCC | 0 | 444.1      | 17GCCAA | 0 |
|                     | N354.6  | 198.2 | 3AGCC | 0 | 444.0      | 17GCCAA | 0 |
| V51/4 <sup>th</sup> | N424.1  | 198.3 | 3AGCC | 0 | 444.1      | 17GCCAA | 0 |
|                     | N424.2  | 198.4 | 3AGCC | 0 | 444.0      | 17GCCAA | 0 |
|                     | N424.3  | 198.4 | 3AGCC | 0 | 444.0      | 17GCCAA | 0 |
|                     | N424.4  | 198.4 | 3AGCC | 0 | 458.0      | 20GCCAA | 0 |
|                     | N424.5  | 198.3 | 3AGCC | 0 | 444.1      | 17GCCAA | 0 |
|                     | N424.6  | 198.2 | 3AGCC | 0 | 448.9      | 18GCCAA | 0 |
|                     |         |       |       |   |            |         |   |
| V52/1 <sup>st</sup> | N52.1   | 198.3 | 3AGCC | 0 | 444.0      | 17GCCAA | 0 |
|                     | N52.2   | 198.5 | 3AGCC | 0 | 444.0      | 17GCCAA | 0 |
|                     | N52.3   | 198.2 | 3AGCC | 0 | 444.1      | 17GCCAA | 0 |
|                     | N52.4   | 198.2 | 3AGCC | 0 | 444.1      | 17GCCAA | 0 |
|                     | N52.5   | 198.3 | 3AGCC | 0 | 444.1      | 17GCCAA | 0 |
|                     | N52.6   | 198.3 | 3AGCC | 0 | 444.1      | 17GCCAA | 0 |
| V52/2 <sup>nd</sup> | N238.1  | 198.3 | 3AGCC | 0 | 444.1      | 17GCCAA | 0 |
|                     | N238.2  | 198.2 | 3AGCC | 0 | 444.1      | 17GCCAA | 0 |
|                     | N238.3  | 198.4 | 3AGCC | 0 | 448.9      | 18GCCAA | 0 |
|                     | N238.4  | 198.3 | 3AGCC | 0 | 444.1      | 17GCCAA | 0 |
|                     | N238.5  | 198.3 | 3AGCC | 0 | 444.0      | 17GCCAA | 0 |
|                     | N238.6  | 198.2 | 3AGCC | 0 | 448.9      | 18GCCAA | 0 |
| V52/3 <sup>rd</sup> | N342.1  | 198.2 | 3AGCC | 0 | 438.8      | 16GCCAA | 1 |
| V52/4 <sup>th</sup> | Cleared |       |       |   |            |         |   |
|                     |         |       |       |   |            |         |   |
| V54/1 <sup>st</sup> | N54.1.1 | 198.3 | 3AGCC | 0 | 439.1 (16) | 16GCCAA | 1 |
|                     | N54.1.2 | 198.3 | 3AGCC | 0 | 439.1      | 16GCCAA | 1 |
|                     | N54.1.3 | 198.2 | 3AGCC | 0 | 439.2      | 16GCCAA | 1 |
|                     | N54.1.4 | 198.3 | 3AGCC | 0 | 439.1      | 16GCCAA | 1 |
|                     | N54.1.5 | 198.2 | 3AGCC | 0 | 439.2      | 16GCCAA | 1 |
|                     | N54.1.6 | 198.3 | 3AGCC | 0 | 439.1      | 16GCCAA | 1 |
| V54/2 <sup>nd</sup> | N237.1  | 198.3 | 3AGCC | 0 | 439.2      | 16GCCAA | 1 |
|                     | N237.2  | 198.4 | 3AGCC | 0 | 439.1      | 16GCCAA | 1 |
|                     | N237.3  | 198.5 | 3AGCC | 0 | 439.1      | 16GCCAA | 1 |
|                     | N237.4  | 198.3 | 3AGCC | 0 | 439.0      | 16GCCAA | 1 |
|                     | N237.5  | 198.3 | 3AGCC | 0 | 439.0      | 16GCCAA | 1 |
|                     | N237.6  | 198.3 | 3AGCC | 0 | 438.5*     | 16GCCAA | 1 |
| V54/3 <sup>rd</sup> | N343.1  | 198.2 | 3AGCC | 0 | 439.2 (16) | 16GCCAA | 1 |

|                     |          |           |       |   |            |         |   |
|---------------------|----------|-----------|-------|---|------------|---------|---|
|                     | N343.2   | 198.3     | 3AGCC | 0 | 439.1      | 16GCCAA | 1 |
|                     | N343.3   | 198.4     | 3AGCC | 0 | 439.2      | 16GCCAA | 1 |
|                     | N343.4   | 198.3     | 3AGCC | 0 | 439.1      | 16GCCAA | 1 |
|                     | N343.5   | 198.2     | 3AGCC | 0 | 439.1      | 16GCCAA | 1 |
|                     | N343.6   | 198.4     | 3AGCC | 0 | 444.1      | 17GCCAA | 0 |
| V54/4 <sup>th</sup> | Replaced |           |       |   |            |         |   |
|                     |          |           |       |   |            |         |   |
| V58/1 <sup>st</sup> | N58.1    | 198.2     | 3AGCC | 0 | 444.0 (17) | 17GCCAA | 0 |
|                     | N58.2    | 198.4     | 3AGCC | 0 | 444.1      | 17GCCAA | 0 |
|                     | N58.3    | 198.3     | 3AGCC | 0 | 444.0      | 17GCCAA | 0 |
|                     | N58.4    | 198.4     | 3AGCC | 0 | 444.0      | 17GCCAA | 0 |
|                     | N58.5    | 198.3     | 3AGCC | 0 | 443.9      | 17GCCAA | 0 |
|                     | N58.6    | 198.4     | 3AGCC | 0 | 444.0      | 17GCCAA | 0 |
| V58/2 <sup>nd</sup> | N240.1   | 198.4     | 3AGCC | 0 | 453.5      | 19GCCAA | 1 |
|                     | N240.2   | 198.3     | 3AGCC | 0 | 471.7      | 23GCCAA | 0 |
| V58/3 <sup>rd</sup> | Cleared  |           |       |   |            |         |   |
| V58/4 <sup>th</sup> | N429.1   | 198.3     | 3AGCC | 0 | 394.4 (7)  | 8GCCAA  | 0 |
|                     | N429.2   | 198.3     | 3AGCC | 0 | 394.8      | 8GCCAA  | 0 |
|                     | N429.3   | 198.2     | 3AGCC | 0 | 467.1      | 22GCCAA | 1 |
|                     | N429.4   | 198.4     | 3AGCC | 0 | 471.8      | 23GCCAA | 0 |
|                     | N429.5   | 198.3     | 3AGCC | 0 | 394.5      | 8GCCAA  | 0 |
|                     | N429.6   | 198.4     | 3AGCC | 0 | 467.1      | 22GCCAA | 1 |
|                     |          |           |       |   |            |         |   |
| V59/1 <sup>st</sup> | N59.1.1  | 198.4     | 3AGCC | 0 | 443.7 (17) | 17GCCAA | 0 |
|                     | N59.1.2  | 198.4     | 3AGCC | 0 | 443.1      | 17GCCAA | 0 |
|                     | N59.1.3  | 198.3     | 3AGCC | 0 | 444.0      | 17GCCAA | 0 |
|                     | N59.1.4  | 198.4     | 3AGCC | 0 | 444.0      | 17GCCAA | 0 |
|                     | N59.1.5  | 198.3     | 3AGCC | 0 | 444.0      | 17GCCAA | 0 |
|                     | N59.1.6  | 198.3 (3) | 3AGCC | 0 | 444.0      | 17GCCAA | 0 |
| V59/2 <sup>nd</sup> | N253.1   | 198.3     | 3AGCC | 0 | 443.9 (17) | 17GCCAA | 0 |
|                     | N253.2   | 198.4     | 3AGCC | 0 | 444.0 (17) | 17GCCAA | 0 |
|                     | N253.3   | 198.2     | 3AGCC | 0 | 443.9      | 17GCCAA | 0 |
|                     | N253.4   | 198.4     | 3AGCC | 0 | 444.0 (16) | 17GCCAA | 0 |
|                     | N253.5   | 198.3     | 3AGCC | 0 | 433.9 (15) | 15GCCAA | 0 |
|                     | N253.6   | 198.4     | 3AGCC | 0 | 443.9 (17) | 17GCCAA | 0 |
| V59/3 <sup>rd</sup> | N352.1   | 198.3     | 3AGCC | 0 | 438.5      | 16GCCAA | 1 |
|                     | N352.2   | 198.5     | 3AGCC | 0 | 438.1      | 16GCCAA | 1 |

|                      |         |       |       |   |                 |          |   |
|----------------------|---------|-------|-------|---|-----------------|----------|---|
|                      | N352.3  | 198.3 | 3AGCC | 0 | 448.1 (18)      | 18GCCAA  | 0 |
|                      | N352.4  | 198.5 | 3AGCC | 0 | 447.7           | 18GCCAA  | 0 |
|                      | N352.5  | 198.3 | 3AGCC | 0 | 442.8           | 17GCCAA  | 0 |
|                      | N352.6  | 198.4 | 3AGCC | 0 | 443.0           | 17GCCAA  | 0 |
| V59/4 <sup>th</sup>  | N438.1  | 198.3 | 3AGCC | 0 | 462.7           | 21GCCAA  | 0 |
|                      | N438.2  | 198.5 | 3AGCC | 0 | 462.4           | 21GCCAA  | 0 |
|                      | N438.3  | 198.5 | 3AGCC | 0 | 443.1           | 17GCCAA  | 0 |
|                      | N438.4  | 198.5 | 3AGCC | 0 | 447.8           | 18GCCAA  | 0 |
|                      | N438.5  | 198.3 | 3AGCC | 0 | 462.6 (16)      | 21GCCAA  | 0 |
|                      | N438.6  | 198.5 | 3AGCC | 0 | 457.7           | 20GCCAA  | 0 |
|                      |         |       |       |   |                 |          |   |
| V88/1 <sup>st</sup>  | N88.1.1 | 198.3 | 3AGCC | 0 | 525.9           | 34GCCAA* | 1 |
|                      | N88.1.2 | 198.4 | 3AGCC | 0 | 525.5           | 34GCCAA  | 1 |
|                      | N88.1.3 | 198.3 | 3AGCC | 0 | 525.8           | 34GCCAA  | 1 |
|                      | N88.1.4 | 198.5 | 3AGCC | 0 | 525.5           | 34GCCAA  | 1 |
|                      | N88.1.5 | 198.3 | 3AGCC | 0 | 525.7           | 34GCCAA  | 1 |
|                      | N88.1.6 | 198.5 | 3AGCC | 0 | 525.6           | 34GCCAA  | 1 |
| V88/2 <sup>nd</sup>  | N272.1  | 198.3 | 3AGCC | 0 | 525.8           | 34GCCAA  | 1 |
|                      | N272.2  | 198.5 | 3AGCC | 0 | 530.4           | 35GCCAA* | 0 |
|                      | N272.3  | 198.4 | 3AGCC | 0 | 525.8           | 34GCCAA  | 1 |
|                      | N272.4  | 198.5 | 3AGCC | 0 | 530.3           | 35GCCAA  | 0 |
|                      | N272.5  | 198.3 | 3AGCC | 0 | 525.8           | 34GCCAA  | 1 |
|                      | N272.6  | 198.5 | 3AGCC | 0 | 525.6           | 34GCCAA  | 1 |
| V88/3 <sup>rd</sup>  | N369.1  | 198.3 | 3AGCC | 0 | 501.5           | 29GCCAA  | 0 |
|                      | N369.2  | 198.4 | 3AGCC | 0 | 501.2           | 29GCCAA  | 0 |
|                      | N369.3  | 198.3 | 3AGCC | 0 | 530.4           | 35GCCAA  | 0 |
|                      | N369.4  | 198.3 | 3AGCC | 0 | 530.3           | 35GCCAA  | 0 |
|                      | N369.5  | 198.3 | 3AGCC | 0 | 501.2           | 29GCCAA  | 0 |
|                      | N369.6  | 198.5 | 3AGCC | 0 | 501.2           | 29GCCAA  | 0 |
| V88/4 <sup>th</sup>  | N449.1  | 198.3 | 3AGCC | 0 | 539.9           | 37GCCAA  | 1 |
|                      | N449.2  | 198.5 | 3AGCC | 0 | 539.9           | 37GCCAA  | 1 |
|                      | N449.3  | 198.4 | 3AGCC | 0 | 539.9           | 37GCCAA  | 1 |
|                      | N449.4  | 198.4 | 3AGCC | 0 | 540>544.9 {1.1} | 37GCCAA  | 1 |
|                      | N449.5  | 198.4 | 3AGCC | 0 | 540.0           | 37GCCAA  | 1 |
|                      | N449.6  | 198.5 | 3AGCC | 0 | 540.0           | 37GCCAA  | 1 |
|                      |         |       |       |   |                 |          |   |
| V138/1 <sup>st</sup> | N138.1  | 198.3 | 3AGCC | 0 | 443.4           | 17GCCAA* | 0 |

|                      |          |            |         |   |            |         |   |
|----------------------|----------|------------|---------|---|------------|---------|---|
|                      | N138.2   | 198.5      | 3AGCC   | 0 | 443.0      | 17GCCAA | 0 |
|                      | N138.3   | 198.3      | 3AGCC   | 0 | 443.1      | 17GCCAA | 0 |
|                      | N138.4   | 198.5      | 3AGCC   | 0 | 442.6      | 17GCCAA | 0 |
|                      | N138.5   | 198.3      | 3AGCC   | 0 | 442.7      | 17GCCAA | 0 |
|                      | N138.6   | 198.5      | 3AGCC   | 0 | 443.0      | 17GCCAA | 0 |
| V138/2 <sup>nd</sup> | N288.1   | 198.3      | 3AGCC   | 0 | 438.1      | 16GCCAA | 1 |
|                      | N288.2   | 198.5      | 3AGCC   | 0 | 442.9      | 17GCCAA | 0 |
|                      | N288.3   | 198.4      | 3AGCC   | 0 | 443.0      | 17GCCAA | 0 |
|                      | N288.4   | 198.4      | 3AGCC   | 0 | 443.0      | 17GCCAA | 0 |
|                      | N288.5   | 198.2      | 3AGCC   | 0 | 472.3      | 23GCCAA | 0 |
|                      | N288.6   | 198.5      | 3AGCC   | 0 | 447.8      | 18GCCAA | 0 |
| V138/3 <sup>rd</sup> | N331.1   | 198.4      | 3AGCC   | 0 | 452.8 (16) | 19GCCAA | 1 |
|                      | N331.2   | 198.5      | 3AGCC   | 0 | 452.7      | 19GCCAA | 1 |
|                      | N331.3   | 198.3      | 3AGCC   | 0 | 452.9      | 19GCCAA | 1 |
|                      | N331.4   | 198.5      | 3AGCC   | 0 | 452.6      | 19GCCAA | 1 |
|                      | N331.5   | 198.3      | 3AGCC   | 0 | 452.5      | 19GCCAA | 1 |
|                      | N331.6   | 198.5      | 3AGCC   | 0 | 452.6      | 19GCCAA | 1 |
| V138/4 <sup>th</sup> | Replaced |            |         |   |            |         |   |
|                      |          |            |         |   |            |         |   |
| <b>cc167</b>         |          |            |         |   |            |         |   |
| V124/1 <sup>st</sup> | N124.1   | 240.7 (13) | 13AGCC  | 1 | Absent     |         |   |
|                      | N124.2   | 241.3      | 13AGCC  | 1 | Absent     |         |   |
|                      | N124.3   | 240.8      | 13AGCC  | 1 | Absent     |         |   |
|                      | N124.4   | 241.2      | 13AGCC  | 1 | Absent     |         |   |
|                      | N124.5   | 236.7      | 12AGCC  | 0 | Absent     |         |   |
|                      | N124.6   | 241.1      | 13AGCC  | 1 | Absent     |         |   |
| V124/2 <sup>nd</sup> | N290.1   | 240.7      | 13AGCC  | 1 | Absent     |         |   |
|                      | N290.2   | 241.2      | 13AGCC  | 1 | Absent     |         |   |
|                      | N290.3   | 240.7      | 13AGCC  | 1 | Absent     |         |   |
|                      | N290.4   | 241.1      | 13AGCC  | 1 | Absent     |         |   |
|                      | N290.5   | 240.8      | 13AGCC  | 1 | Absent     |         |   |
|                      | N290.6   | 236.8      | 13AGCC* | 1 | Absent     |         |   |
| V124/3 <sup>rd</sup> | N336.1   | 240.9 (13) | 13AGCC  | 1 | Absent     |         |   |
|                      | N336.2   | 241.0      | 14AGCC  | 0 | Absent     |         |   |
|                      | N336.3   | 240.6      | 13AGCC  | 1 | Absent     |         |   |
|                      | N336.4   | 240.6      | 13AGCC  | 1 | Absent     |         |   |
|                      | N336.5   | 240.6      | 13AGCC  | 1 | Absent     |         |   |

|                      |        |                      |        |   |        |  |  |
|----------------------|--------|----------------------|--------|---|--------|--|--|
|                      | N336.6 | 240.6                | 13AGCC | 1 | Absent |  |  |
|                      |        |                      |        |   | Absent |  |  |
| V64/1 <sup>st</sup>  | N64.1  | 240.5 (13)           | 13AGCC | 1 | Absent |  |  |
|                      | N64.2  | 240.7                | 13AGCC | 1 | Absent |  |  |
|                      | N64.3  | 240.7                | 13AGCC | 1 | Absent |  |  |
|                      | N64.4  | 240.7                | 13AGCC | 1 | Absent |  |  |
|                      | N64.5  | 240.6                | 13AGCC | 1 | Absent |  |  |
|                      | N64.6  | 240.8                | 13AGCC | 1 | Absent |  |  |
| V64/2 <sup>nd</sup>  | N257.1 | 240.8                | 13AGCC | 1 | Absent |  |  |
|                      | N257.2 | 240.6                | 13AGCC | 1 | Absent |  |  |
|                      | N257.3 | 240.6                | 13AGCC | 1 | Absent |  |  |
|                      | N257.4 | 244.8                | 14AGCC | 0 | Absent |  |  |
|                      | N257.5 | 240.6                | 13AGCC | 1 | Absent |  |  |
|                      | N257.6 | 244.8                | 14AGCC | 0 | Absent |  |  |
| V64/3 <sup>rd</sup>  | N348.1 | 240.5 (13)           | 13AGCC | 1 | Absent |  |  |
|                      | N348.2 | 240.6                | 13AGCC | 1 | Absent |  |  |
|                      | N348.3 | 244.7                | 14AGCC | 0 | Absent |  |  |
|                      | N348.4 | 244.9                | 14AGCC | 0 | Absent |  |  |
|                      | N348.5 | 236.5                | 12AGCC | 0 | Absent |  |  |
|                      | N348.6 | 240.8                | 13AGCC | 1 | Absent |  |  |
|                      |        |                      |        |   | Absent |  |  |
| V117/1 <sup>st</sup> | N117.1 | 240.8 (13)           | 13AGCC | 1 | Absent |  |  |
|                      | N117.2 | 244.8                | 14AGCC | 0 | Absent |  |  |
| V117/2 <sup>nd</sup> | N284.1 | 240.6                | 13AGCC | 1 | Absent |  |  |
|                      | N284.2 | 240.6                | 13AGCC | 1 | Absent |  |  |
|                      | N284.3 | 244.7                | 14AGCC | 0 | Absent |  |  |
|                      | N284.4 | 240.6                | 13AGCC | 1 | Absent |  |  |
|                      | N284.5 | 240.6                | 13AGCC | 1 | Absent |  |  |
|                      | N284.6 | 240.6                | 13AGCC | 1 | Absent |  |  |
| V117/3 <sup>rd</sup> | N332.1 | 240.5                | 13AGCC | 1 | Absent |  |  |
|                      | N332.2 | 240.6                | 13AGCC | 1 | Absent |  |  |
|                      | N332.3 | 240.6                | 13AGCC | 1 | Absent |  |  |
|                      | N332.4 | 240.7                | 13AGCC | 1 | Absent |  |  |
|                      | N332.5 | 245.0>240.7 (1)      | 14AGCC | 0 | Absent |  |  |
|                      | N332.6 | 244.9                | 14AGCC | 0 | Absent |  |  |
| V117/4 <sup>th</sup> | N417.1 | 240.6>236.4 (1) (13) | 13AGCC | 1 | Absent |  |  |
|                      | N417.2 | 240.5>236.3 (1.1)    | 13AGCC | 1 | Absent |  |  |

|                     |            |                 |         |   |        |  |  |
|---------------------|------------|-----------------|---------|---|--------|--|--|
|                     | N417.3     | 244.7>240.5 (1) | 14AGCC  | 0 | Absent |  |  |
|                     | N417.4     | 240.6           | 13AGCC  | 1 | Absent |  |  |
|                     | N417.5     | 244.8           | 14AGCC  | 0 | Absent |  |  |
|                     | N417.6     | 244.8           | 14AGCC  | 0 | Absent |  |  |
|                     |            |                 |         |   | Absent |  |  |
| <b>cc23</b>         |            |                 |         |   |        |  |  |
| V69/1 <sup>st</sup> | N1-carrier |                 |         |   | Absent |  |  |
| V69/2 <sup>nd</sup> | N258.1     | 256.8           | 17AGCC  | 0 | Absent |  |  |
|                     | N258.2     | 253.1 (16)      | 16AGCC  | 1 | Absent |  |  |
|                     | N258.3     | 249.8 (16)      | 16AGCC* | 1 | Absent |  |  |
|                     | N258.4     | 253.2 (16)      | 16AGCC  | 1 | Absent |  |  |
|                     | N258.5     | 257.1 (17)      | 17AGCC  | 0 | Absent |  |  |
|                     | N258.6     | 253.2 (16)      | 16AGCC  | 1 | Absent |  |  |
| V69/3 <sup>rd</sup> | No sample  |                 |         |   | Absent |  |  |
| V69/4 <sup>th</sup> | N431.1     | 257.1 (17)      | 17AGCC  | 0 | Absent |  |  |
|                     | N431.2     | 261.0 (18)      | 18AGCC  | 0 | Absent |  |  |
|                     | N431.3     | 260.9 (18)      | 18AGCC  | 0 | Absent |  |  |
|                     | N431.4     | 261.9 (19)      | 19AGCC  | 1 | Absent |  |  |
|                     | N431.5     | 256.9 (17)      | 17AGCC  | 0 | Absent |  |  |
|                     | N431.6     | 260.8 (18)      | 18AGCC  | 1 | Absent |  |  |
|                     |            |                 |         |   |        |  |  |
| V93/1 <sup>st</sup> | N1-carrier |                 |         |   | Absent |  |  |
| V93/2 <sup>nd</sup> | N264.1     | 249.0 (15)      | 15AGCC  | 0 | Absent |  |  |
|                     | N264.2     | 249.1           | 15AGCC  | 0 | Absent |  |  |
|                     | N264.3     | 253.1           | 16AGCC  | 1 | Absent |  |  |
|                     | N264.4     | 249.2           | 15AGCC  | 0 | Absent |  |  |
|                     | N264.5     | 249.3           | 15AGCC  | 0 | Absent |  |  |
|                     | N264.6     | 249.2           | 15AGCC  | 0 | Absent |  |  |
| V93/3 <sup>rd</sup> | N359.1     | 257.1           | 17AGCC  | 0 | Absent |  |  |
|                     | N359.2     | 253.9           | 16AGCC  | 1 | Absent |  |  |
|                     | N359.3     | 257.0           | 17AGCC  | 0 | Absent |  |  |
|                     | N359.4     | 257.0           | 17AGCC  | 0 | Absent |  |  |
|                     | N359.5     | 256.9           | 17AGCC  | 0 | Absent |  |  |
|                     | N359.6     | 256.9           | 17AGCC  | 0 | Absent |  |  |
|                     |            |                 |         |   |        |  |  |
| V96/1 <sup>st</sup> | N1-carrier |                 |         |   | Absent |  |  |
| V96/2 <sup>nd</sup> | N259.1     | 260.9           | 18AGCC  | 0 | Absent |  |  |

|                      |        |           |        |   |        |  |  |
|----------------------|--------|-----------|--------|---|--------|--|--|
|                      | N259.2 | 260.8     | 18AGCC | 0 | Absent |  |  |
|                      | N259.3 | 260.9     | 18AGCC | 0 | Absent |  |  |
|                      | N259.4 | 261.0     | 18AGCC | 0 | Absent |  |  |
|                      | N259.5 | 261.0     | 18AGCC | 0 | Absent |  |  |
|                      | N259.6 | 257.1     | 17AGCC | 0 | Absent |  |  |
| V96/3 <sup>rd</sup>  | N370.1 | 264.9     | 19AGCC | 1 | Absent |  |  |
|                      | N370.2 | 264.9     | 19AGCC | 1 | Absent |  |  |
|                      | N370.3 | 260.9     | 18AGCC | 0 | Absent |  |  |
|                      | N370.4 | 260.9     | 18AGCC | 0 | Absent |  |  |
|                      | N370.5 | 260.9     | 18AGCC | 0 | Absent |  |  |
|                      | N370.6 | 264.8     | 19AGCC | 0 | Absent |  |  |
| V96/4 <sup>th</sup>  | N445.1 | 264.8     | 19AGCC | 0 | Absent |  |  |
|                      | N445.2 | 264.8     | 19AGCC | 0 | Absent |  |  |
|                      | N445.3 | 264.8     | 19AGCC | 0 | Absent |  |  |
|                      | N445.4 | 264.9     | 19AGCC | 0 | Absent |  |  |
|                      | N445.5 | 264.9     | 19AGCC | 0 | Absent |  |  |
|                      | N445.6 | 265.0     | 19AGCC | 0 | Absent |  |  |
|                      |        |           |        |   |        |  |  |
| V222/1 <sup>st</sup> | N222.1 | 224.0 (9) | 9AGCC* | 0 | Absent |  |  |
|                      | N222.2 | 215.5     | 7AGCC  | 1 | Absent |  |  |
|                      | N222.3 | 215.5     | 7AGCC  | 1 | Absent |  |  |
|                      | N222.4 | 215.4     | 7AGCC  | 1 | Absent |  |  |
|                      | N222.5 | 219.6     | 8AGCC  | 0 | Absent |  |  |
|                      | N222.6 | 219.7     | 8AGCC  | 0 | Absent |  |  |
| V222/2 <sup>nd</sup> | N309.1 | 215.4     | 7AGCC  | 1 | Absent |  |  |
|                      | N309.2 | 215.4     | 7AGCC  | 1 | Absent |  |  |
|                      | N309.3 | 215.3     | 7AGCC  | 1 | Absent |  |  |
|                      | N309.4 | 215.5     | 7AGCC  | 1 | Absent |  |  |
|                      | N309.5 | 212.3     | 7AGCC  | 1 | Absent |  |  |
|                      | N309.6 | 212.4     | 7AGCC  | 1 | Absent |  |  |
| V222/3 <sup>rd</sup> | N391.1 | 216.5     | 8AGCC  | 0 | Absent |  |  |
|                      | N391.2 | 216.7     | 8AGCC  | 0 | Absent |  |  |
|                      | N391.3 | 216.4     | 8AGCC  | 0 | Absent |  |  |
|                      | N391.4 | 216.5     | 8AGCC  | 0 | Absent |  |  |
|                      | N391.5 | 216.4     | 8AGCC  | 0 | Absent |  |  |
|                      | N391.6 | 220.6     | 9AGCC  | 0 | Absent |  |  |
| V222/4 <sup>th</sup> | N459.1 | 216.6 (8) | 8AGCC  | 0 | Absent |  |  |

|                      |        |            |        |   |            |         |   |
|----------------------|--------|------------|--------|---|------------|---------|---|
|                      | N459.2 | 216.8      | 8AGCC  | 0 | Absent     |         |   |
|                      | N459.3 | 216.6      | 8AGCC  | 0 | Absent     |         |   |
|                      | N459.4 | 216.6      | 8AGCC  | 0 | Absent     |         |   |
|                      | N459.5 | 216.5      | 8AGCC  | 0 | Absent     |         |   |
|                      | N459.6 | 216.6      | 8AGCC  | 0 | Absent     |         |   |
| <b>cc60</b>          |        |            |        |   |            |         |   |
| V114/1 <sup>st</sup> | N114.1 | 257.1 (17) | 17AGCC | 0 | 419.1 (12) | 12GCCAA | 0 |
|                      | N114.2 | 257.0      | 17AGCC | 0 | 419.4      | 12GCCAA | 0 |
|                      | N114.3 | 257.1      | 17AGCC | 0 | 419.2      | 12GCCAA | 0 |
|                      | N114.4 | 257.0      | 17AGCC | 0 | 419.3      | 12GCCAA | 0 |
|                      | N114.5 | 257.0      | 17AGCC | 0 | 419.3      | 12GCCAA | 0 |
|                      | N114.6 | 256.9      | 17AGCC | 0 | 414.4      | 11GCCAA | 0 |
| V114/2 <sup>nd</sup> | N283.1 | 249.1      | 15AGCC | 0 | 428.9      | 14GCCAA | 0 |
|                      | N283.2 | 260.8      | 18AGCC | 0 | 429.1      | 14GCCAA | 0 |
|                      | N283.3 | 257.1      | 17AGCC | 0 | 428.9      | 14GCCAA | 0 |
|                      | N283.4 | 249.1      | 15AGCC | 0 | 428.8      | 14GCCAA | 0 |
|                      | N283.5 | 261.0      | 18AGCC | 0 | 23.8       | 13GCCAA | 1 |
|                      | N283.6 | 257.1      | 17AGCC | 0 | 428.9      | 14GCCAA | 0 |
| V114/3 <sup>rd</sup> | N330.1 | 257.0 (17) | 17AGCC | 0 | 424.1 (13) | 13GCCAA | 1 |
|                      | N330.2 | 256.9      | 17AGCC | 0 | 424.2      | 13GCCAA | 1 |
|                      | N330.3 | 257.0      | 17AGCC | 0 | 424.2      | 13GCCAA | 1 |
|                      | N330.4 | 256.9      | 17AGCC | 0 | 424.3      | 13GCCAA | 1 |
|                      | N330.5 | 257.0      | 17AGCC | 0 | 424.1      | 13GCCAA | 1 |
|                      | N330.6 | 256.9      | 17AGCC | 0 | 424.1      | 13GCCAA | 1 |
| V134/1 <sup>st</sup> | N134.1 | 257.0 (17) | 17AGCC | 0 | 424.0 (13) | 13GCCAA | 1 |
|                      | N134.2 | 256.9      | 17AGCC | 0 | 419.3      | 12GCCAA | 0 |
|                      | N134.3 | 257.1      | 17AGCC | 0 | 419.2      | 12GCCAA | 0 |
|                      | N134.4 | 257.0      | 17AGCC | 0 | 419.3      | 12GCCAA | 0 |
|                      | N134.5 | 257.1      | 17AGCC | 0 | 418.9      | 12GCCAA | 0 |
|                      | N134.6 | 253.1      | 16AGCC | 1 | 419.1      | 12GCCAA | 0 |
| V134/2 <sup>nd</sup> | N295.1 | 257.0      | 17AGCC | 0 | 419.3      | 12GCCAA | 0 |
|                      | N295.2 | 257.0      | 17AGCC | 0 | 419.2      | 12GCCAA | 0 |
|                      | N295.3 | 249.2      | 15AGCC | 0 | 419.2      | 12GCCAA | 0 |
|                      | N295.4 | 256.8      | 17AGCC | 0 | 419.3      | 12GCCAA | 0 |
|                      | N295.5 | 249.2      | 15AGCC | 0 | 419.3      | 12GCCAA | 0 |

|                      |        |            |        |   |            |         |   |
|----------------------|--------|------------|--------|---|------------|---------|---|
|                      | N295.6 | 256.8      | 17AGCC | 0 | 419.4      | 12GCCAA | 0 |
| V134/3 <sup>rd</sup> | N333.1 | 257.0 (17) | 17AGCC | 0 | 419.2 (12) | 12GCCAA | 0 |
|                      | N333.2 | 256.9      | 17AGCC | 0 | 419.3      | 12GCCAA | 0 |
|                      | N333.3 | 253.2      | 16AGCC | 1 | 419.2      | 12GCCAA | 0 |
|                      | N333.4 | 256.9      | 17AGCC | 0 | 414.4      | 11GCCAA | 0 |
|                      | N333.5 | 257.2      | 17AGCC | 0 | 419.2      | 12GCCAA | 0 |
|                      | N333.6 | 257.0      | 17AGCC | 0 | 419.3      | 12GCCAA | 0 |
|                      |        |            |        |   |            |         |   |
| V185/1 <sup>st</sup> | N185.1 | 253.3 (16) | 16AGCC | 1 | 404.4 (9)  | 9GCCAA  | 0 |
|                      | N185.2 | 253.2 (16) | 16AGCC | 1 | 409.4 (10) | 10GCCAA | 1 |
|                      | N185.3 | 253.2      | 16AGCC | 1 | 404.4      | 9GCCAA  | 0 |
|                      | N185.4 | 257.0      | 17AGCC | 0 | 404.5      | 9GCCAA  | 0 |
|                      | N185.5 | 249.3      | 15AGCC | 0 | 404.4      | 9GCCAA  | 0 |
|                      | N185.6 | 253.1      | 16AGCC | 1 | 404.5      | 9GCCAA  | 0 |
| V185/2 <sup>nd</sup> | N306.1 | 249.2      | 15AGCC | 0 | 404.4      | 9GCCAA  | 0 |
|                      | N306.2 | 244.9      | 14AGCC | 0 | 404.5      | 9GCCAA  | 0 |
|                      | N306.3 | 249.3      | 15AGCC | 0 | 404.4      | 9GCCAA  | 0 |
|                      | N306.4 | 249.2      | 15AGCC | 0 | 404.5      | 9GCCAA  | 0 |
|                      | N306.5 | 249.4      | 15AGCC | 0 | 404.3      | 9GCCAA  | 0 |
|                      | N306.6 | 249.3      | 15AGCC | 0 | 404.4      | 9GCCAA  | 0 |
| V185/4 <sup>th</sup> | N456.1 | 245.2 (14) | 14AGCC | 0 | 404.3 (9)  | 9GCCAA  | 0 |
|                      | N456.2 | 245.1 (14) | 14AGCC | 0 | 404.3 (9)  | 9GCCAA  | 0 |
|                      | N456.3 | 240.8      | 13AGCC | 1 | 409.3      | 10GCCAA | 1 |
|                      | N456.4 | 257.0      | 17AGCC | 0 | 404.5      | 9GCCAA  | 0 |
|                      | N456.5 | 253.2      | 16AGCC | 1 | 404.5      | 9GCCAA  | 0 |
|                      | N456.6 | 249.2      | 15AGCC | 0 | 404.5      | 9GCCAA  | 0 |
|                      |        |            |        |   |            |         |   |
| V113/1 <sup>st</sup> | N113.1 | 257.1      | 17AGCC | 0 | 419.3      | 12GCCAA | 0 |
|                      | N113.2 | 249.1      | 15AGCC | 0 | 404.5      | 9GCCAA  | 0 |
|                      | N113.3 | 257.0      | 17AGCC | 0 | 419.3      | 12GCCAA | 0 |
|                      | N113.4 | 256.9      | 17AGCC | 0 | 419.3      | 12GCCAA | 0 |
|                      | N113.5 | 257.2      | 17AGCC | 0 | 419.2      | 12GCCAA | 0 |
|                      | N113.6 | 257.0      | 17AGCC | 0 | 419.3      | 12GCCAA | 0 |
| V113/2 <sup>nd</sup> | N281.1 | 257.1      | 17AGCC | 0 | 419.2      | 12GCCAA | 0 |
|                      | N281.2 | 257.1      | 17AGCC | 0 | 419.3      | 12GCCAA | 0 |
|                      | N281.3 | 257.0      | 17AGCC | 0 | 419.0      | 12GCCAA | 0 |
|                      | N281.4 | 256.9      | 17AGCC | 0 | 419.2      | 12GCCAA | 0 |

|                      |        |       |        |   |       |          |   |
|----------------------|--------|-------|--------|---|-------|----------|---|
|                      | N281.5 | 257.0 | 17AGCC | 0 | 419.3 | 12GCCAA  | 0 |
|                      | N281.6 | 256.9 | 17AGCC | 0 | 419.2 | 12GCCAA  | 0 |
|                      |        |       |        |   |       |          |   |
| V115/1 <sup>st</sup> | N115.1 | 257.0 | 17AGCC | 0 | 419.2 | 12GCCAA  | 0 |
|                      | N115.2 | 253.6 | 17AGCC | 0 | 418.6 | 12GCCAA* | 0 |
|                      | N115.3 | 257.1 | 17AGCC | 0 | 419.2 | 12GCCAA  | 0 |
|                      | N115.4 | 257.0 | 17AGCC | 0 | 419.3 | 12GCCAA  | 0 |
|                      | N115.5 | 257.2 | 17AGCC | 0 | 419.3 | 12GCCAA  | 0 |
|                      | N115.6 | 257.1 | 17AGCC | 0 | 419.3 | 12GCCAA  | 0 |
| V115/2 <sup>nd</sup> | N282.1 | 257.2 | 17AGCC | 0 | 414.3 | 11GCCAA  | 0 |
|                      | N282.2 | 228.1 | 10AGCC | 1 | 419.2 | 12GCCAA  | 0 |
|                      | N282.3 | 257.1 | 17AGCC | 0 | 419.3 | 12GCCAA  | 0 |
|                      | N282.4 | 257.0 | 17AGCC | 0 | 414.4 | 11GCCAA  | 0 |
|                      | N282.5 | 257.1 | 17AGCC | 0 | 419.2 | 12GCCAA  | 0 |
|                      | N282.6 | 257.0 | 17AGCC | 0 | 414.3 | 11GCCAA  | 0 |
|                      |        |       |        |   |       |          |   |
| <b>cc32</b>          |        |       |        |   |       |          |   |
| V176/1 <sup>st</sup> | N176.1 | 266.1 | 20AGCC | 0 | 458.0 | 19CCCAA  | 0 |
|                      | N176.2 | 266.1 | 20AGCC | 0 | 458.0 | 19CCCAA  | 0 |
|                      | N176.3 | 266.2 | 20AGCC | 0 | 458.0 | 19CCCAA  | 0 |
|                      | N176.4 | 266.1 | 20AGCC | 0 | 458.0 | 19CCCAA  | 0 |
|                      | N176.5 | 202.6 | 4AGCC  | 1 | 457.9 | 19CCCAA  | 0 |
|                      | N176.6 | 266.3 | 20AGCC | 0 | 458.0 | 19CCCAA  | 0 |
| V176/2 <sup>nd</sup> | N318.1 | 266.2 | 20AGCC | 0 | 457.9 | 19CCCAA  | 0 |
|                      | N318.2 | 266.2 | 20AGCC | 0 | 458.0 | 19CCCAA  | 0 |
|                      | N318.3 | 266.3 | 20AGCC | 0 | 457.9 | 19CCCAA  | 0 |
|                      | N318.4 | 266.1 | 20AGCC | 0 | 458.0 | 19CCCAA  | 0 |
|                      | N318.5 | 266.1 | 20AGCC | 0 | 458.0 | 19CCCAA  | 0 |
|                      | N318.6 | 266.4 | 20AGCC | 0 | 458.0 | 19CCCAA  | 0 |
| V176/3 <sup>rd</sup> | N399.1 | 266.4 | 20AGCC | 0 | 458.1 | 19CCCAA  | 0 |
|                      | N399.2 | 266.3 | 20AGCC | 0 | 458.0 | 19CCCAA  | 0 |
|                      | N399.3 | 266.4 | 20AGCC | 0 | 457.9 | 19CCCAA  | 0 |
|                      | N399.4 | 266.4 | 20AGCC | 0 | 458.0 | 19CCCAA  | 0 |
|                      | N399.5 | 266.3 | 20AGCC | 0 | 457.9 | 19CCCAA  | 0 |
|                      | N399.6 | 266.2 | 20AGCC | 0 | 462.5 | 20CCCAA* | 0 |
| V176/4 <sup>th</sup> | N408.1 | 266.2 | 20AGCC | 0 | 457.9 | 19CCCAA  | 0 |
|                      | N408.2 | 266.3 | 20AGCC | 0 | 457.7 | 19CCCAA  | 0 |

|  |        |       |        |   |       |         |   |
|--|--------|-------|--------|---|-------|---------|---|
|  | N408.3 | 266.0 | 20AGCC | 0 | 457.9 | 19CCCAA | 0 |
|  | N408.4 | 266.2 | 20AGCC | 0 | 452.8 | 18CCCAA | 0 |
|  | N408.6 | 266.3 | 20AGCC | 0 | 457.6 | 19CCCAA | 0 |

<sup>1</sup>Fragments sizes were determined using either a GS600LIZ (black type) or GS500LIZ (blue type) size standard; numbers in curly brackets indicate the ratio between the PCR fragment sizes where two obvious peaks were observed. <sup>2</sup>an asterisk indicates that the PCR fragment was sequenced by dideoxy sequencing and the repeat number determined by visual inspection of the trace file. <sup>3</sup>Expression states, 1=1, 0=0 (all genes are subject to translational phase variation).



|         |       |       |    |    |     |    |       |    |    |    |    |
|---------|-------|-------|----|----|-----|----|-------|----|----|----|----|
| V96/2nd | 259.1 | 472.0 | 5  | 6  | 17  | 0  | 620.7 | 5  | 6  | 5  | 0  |
|         | 259.2 | 477.1 | 5  | 6  | 18  | 1  | 620.7 | 5  | 6  | 5  | 0  |
|         | 259.3 | 482.1 | 5  | 6  | 19  | 0  | 626.6 | 5  | 6  | 6  | 1  |
|         | 259.4 | 477.1 | 5  | 6  | 18* | 1  | 621.1 | 5  | 6  | 5  | 0  |
|         | 259.5 | 477.2 | 5  | 6  | 18  | 1  | 621.1 | 5  | 6  | 5  | 0  |
|         | 259.6 | 482.1 | 5  | 6  | 19  | 0  | 626.3 | 5  | 6  | 6  | 1  |
| V96/3rd | 370.1 | ND    | ND | ND | ND  | ND | ND    | ND | ND | ND | ND |
|         | 370.2 | 738.6 | 5  | 6  | 18  | 1  | 621.4 | 5  | 6  | 5  | 0  |
|         | 370.3 | 487.8 | 5  | 6  | 20* | 0  | 626.7 | 5  | 6  | 6  | 1  |
|         | 370.4 | 748.4 | 5  | 6  | 20* | 0  | 621.4 | 5  | 6  | 5  | 0  |
|         | 370.5 | 738.6 | 5  | 6  | 18  | 1  | 621.5 | 5  | 6  | 5  | 0  |
|         | 370.6 | 728.5 | 5  | 6  | 16  | 0  | 621.5 | 5  | 6  | 5  | 0  |
| V96/4th | 445.1 | 728.5 | 5  | 6  | 16  | 0  | 625.8 | 5  | 6  | 6  | 1  |
|         | 445.2 | 728.6 | 5  | 6  | 16  | 0  | 625.6 | 5  | 6  | 6  | 1  |
|         | 445.3 | 728.5 | 5  | 6  | 16* | 0  | 626.0 | 5  | 6  | 6  | 1  |
|         | 445.4 | 728.5 | 5  | 6  | 16  | 0  | 626.1 | 5  | 6  | 6  | 1  |
|         | 445.5 | 728.5 | 5  | 6  | 16  | 0  | 626.2 | 5  | 6  | 6  | 1  |
|         | 445.6 | 733.4 | 5  | 6  | 17  | 0  | 625.8 | 5  | 6  | 6  | 1  |
|         |       |       |    |    |     |    |       |    |    |    |    |
| V69/2nd | 258.1 | 482.0 | 5  | 6  | 19  | 0  | 641.7 | 5  | 6  | 9  | 1  |
|         | 258.2 | 482.1 | 5  | 6  | 19  | 0  | 641.2 | 5  | 6  | 9  | 1  |
|         | 258.3 | 482.1 | 5  | 6  | 19  | 0  | 641.4 | 5  | 6  | 9  | 1  |
|         | 258.4 | 482.6 | 5  | 6  | 19  | 0  | 641.8 | 5  | 6  | 9  | 1  |
|         | 258.5 | 482.6 | 5  | 6  | 19  | 0  | 641.5 | 5  | 6  | 9  | 1  |
|         | 258.6 | 482.0 | 5  | 6  | 19  | 0  | 641.6 | 5  | 6  | 9  | 1  |
| V69/3rd | 431.1 | 472.2 | 5  | 6  | 17  | 0  | 652.1 | 5  | 6  | 11 | 0  |
|         | 431.2 | 472.1 | 5  | 6  | 17  | 0  | 657.2 | 5  | 6  | 12 | 1  |
|         | 431.3 | 472.4 | 5  | 6  | 17  | 0  | 657.1 | 5  | 6  | 12 | 1  |
|         | 431.4 | 472.4 | 5  | 6  | 17  | 0  | 656.7 | 5  | 6  | 12 | 1  |
|         | 431.5 | 472.4 | 5  | 6  | 17  | 0  | 672.1 | 5  | 6  | 15 | 1  |

|              |       |       |   |   |    |   |       |   |   |     |   |
|--------------|-------|-------|---|---|----|---|-------|---|---|-----|---|
|              | 431.6 | 477.4 | 5 | 6 | 18 | 1 | 652.1 | 5 | 6 | 11  | 0 |
| V93/2nd      | 264.1 | 472.5 | 5 | 6 | 17 | 0 | 641.6 | 5 | 6 | 9   | 1 |
|              | 264.2 | 472.4 | 5 | 6 | 17 | 0 | 641.4 | 5 | 6 | 9   | 1 |
|              | 264.3 | 461.9 | 5 | 6 | 15 | 1 | 626.8 | 5 | 6 | 6   | 1 |
|              | 264.4 | 472.4 | 5 | 6 | 17 | 0 | 641.9 | 5 | 6 | 9   | 1 |
|              | 264.5 | 472.3 | 5 | 6 | 17 | 0 | 641.0 | 5 | 6 | 9   | 1 |
|              | 264.6 | 471.8 | 5 | 6 | 17 | 0 | 641.0 | 5 | 6 | 9   | 1 |
| V93/3rd      | 359.1 | 482.7 | 5 | 6 | 19 | 0 | 642.0 | 5 | 6 | 9   | 1 |
|              | 359.2 | 482.7 | 5 | 6 | 19 | 0 | 641.6 | 5 | 6 | 9   | 1 |
|              | 359.3 | 482.4 | 5 | 6 | 19 | 0 | 642.1 | 5 | 6 | 9   | 1 |
|              | 359.4 | 482.6 | 5 | 6 | 19 | 0 | 641.2 | 5 | 6 | 9   | 1 |
|              | 359.5 | 487.7 | 5 | 6 | 20 | 0 | 641.6 | 5 | 6 | 9   | 1 |
|              | 359.6 | 482.3 | 5 | 6 | 19 | 0 | 641.0 | 5 | 6 | 9   | 1 |
| <b>cc167</b> |       |       |   |   |    |   |       |   |   |     |   |
| V117/1st     | 117.1 | 616.5 | 5 | 6 | 4  | 0 | 652.8 | 5 | 6 | 12  | 1 |
|              | 117.2 | 616.7 | 5 | 6 | 4* | 0 | 652.8 | 5 | 6 | 12* | 1 |
| V117/2nd     | 284.1 | 617.0 | 5 | 6 | 4  | 0 | 647.9 | 5 | 6 | 11  | 0 |
|              | 284.2 | 617.1 | 5 | 6 | 4  | 0 | 658.3 | 5 | 6 | 13  | 0 |
|              | 284.3 | 617.1 | 5 | 6 | 4  | 0 | 653.1 | 5 | 6 | 12  | 1 |
|              | 284.4 | 617.0 | 5 | 6 | 4  | 0 | 658.1 | 5 | 6 | 13  | 0 |
|              | 284.5 | 616.9 | 5 | 6 | 4  | 0 | 652.9 | 5 | 6 | 12  | 1 |
|              | 284.6 | 617.0 | 5 | 6 | 4  | 0 | 652.8 | 5 | 6 | 12  | 1 |
| V117/3rd     | 332.1 | 616.4 | 5 | 6 | 4  | 0 | 683.2 | 5 | 6 | 18* | 1 |
|              | 332.2 | 616.6 | 5 | 6 | 4  | 0 | 673.2 | 5 | 6 | 16  | 0 |
|              | 332.3 | 616.8 | 5 | 6 | 4  | 0 | 673.1 | 5 | 6 | 16  | 0 |
|              | 332.4 | 616.8 | 5 | 6 | 4  | 0 | 668.0 | 5 | 6 | 15  | 1 |
|              | 332.6 | 616.5 | 5 | 6 | 4  | 0 | 647.0 | 5 | 6 | 11  | 0 |
| V117/4th     | 417.1 | 661.0 | 5 | 6 | 13 | 0 | 656.9 | 5 | 6 | 13  | 0 |
|              | 417.2 | 661.8 | 5 | 6 | 13 | 0 | 657.6 | 5 | 6 | 13  | 0 |

|          |       |       |   |   |    |   |       |   |   |     |   |
|----------|-------|-------|---|---|----|---|-------|---|---|-----|---|
|          | 417.3 | 652.3 | 5 | 6 | 11 | 0 | 653.1 | 5 | 6 | 12  | 1 |
|          | 417.4 | 645.7 | 5 | 6 | 10 | 0 | 651.3 | 5 | 6 | 12  | 1 |
|          | 417.5 | 652.2 | 5 | 6 | 11 | 0 | 653.1 | 5 | 6 | 12  | 1 |
|          | 417.6 | 652.2 | 5 | 6 | 11 | 0 | 653.1 | 5 | 6 | 12  | 1 |
|          |       |       |   |   |    |   |       |   |   |     |   |
| V64/1st  | 64.1  | 616.6 | 5 | 6 | 4* | 0 | 652.8 | 5 | 6 | 12  | 1 |
|          | 64.2  | 616.7 | 5 | 6 | 4  | 0 | 652.7 | 5 | 6 | 12  | 1 |
|          | 64.3  | 616.8 | 5 | 6 | 4  | 0 | 652.7 | 5 | 6 | 12  | 1 |
|          | 64.4  | 616.8 | 5 | 6 | 4  | 0 | 652.8 | 5 | 6 | 12  | 1 |
|          | 64.5  | 616.4 | 5 | 6 | 4  | 0 | 651.7 | 5 | 6 | 12  | 1 |
|          | 64.6  | 616.6 | 5 | 6 | 4  | 0 | 652.7 | 5 | 6 | 12  | 1 |
| V64/2nd  | 257.1 | 616.6 | 5 | 6 | 4  | 0 | 667.7 | 5 | 6 | 15  | 1 |
|          | 257.2 | 617.0 | 5 | 6 | 4  | 0 | 668.3 | 5 | 6 | 15  | 1 |
|          | 257.3 | 617.1 | 5 | 6 | 4  | 0 | 643.0 | 5 | 6 | 10  | 0 |
|          | 257.4 | 617.1 | 5 | 6 | 4  | 0 | 668.3 | 5 | 6 | 15  | 1 |
|          | 257.5 | 617.0 | 5 | 6 | 4  | 0 | 668.3 | 5 | 6 | 15  | 1 |
|          | 257.6 | 616.9 | 5 | 6 | 4  | 0 | 668.2 | 5 | 6 | 15  | 1 |
| V64/3rd  | 348.1 | 616.5 | 5 | 6 | 4  | 0 | 662.7 | 5 | 6 | 14  | 0 |
|          | 348.2 | 616.7 | 5 | 6 | 4  | 0 | 662.8 | 5 | 6 | 14  | 0 |
|          | 348.3 | 616.5 | 5 | 6 | 4  | 0 | 662.8 | 5 | 6 | 14  | 0 |
|          | 348.4 | 616.7 | 5 | 6 | 4  | 0 | 662.7 | 5 | 6 | 14  | 0 |
|          | 348.5 | 616.5 | 5 | 6 | 4  | 0 | 662.7 | 5 | 6 | 14  | 0 |
|          | 348.6 | 616.6 | 5 | 6 | 4  | 0 | 662.0 | 5 | 6 | 14  | 0 |
|          |       |       |   |   |    |   |       |   |   |     |   |
| V124/1st | 124.1 | 617.0 | 5 | 6 | 4  | 0 | 657.1 | 5 | 6 | 12  | 1 |
|          | 124.2 | 617.0 | 5 | 6 | 4* | 0 | 657.3 | 5 | 6 | 12* | 1 |
|          | 124.3 | 616.3 | 5 | 6 | 4  | 0 | 656.0 | 5 | 6 | 12  | 1 |
|          | 124.4 | 616.3 | 5 | 6 | 4  | 0 | 655.8 | 5 | 6 | 12  | 1 |
|          | 124.5 | 616.3 | 5 | 6 | 4  | 0 | 656.0 | 5 | 6 | 12  | 1 |
| V124/2nd | 290.1 | 616.4 | 5 | 6 | 4  | 0 | 656.8 | 5 | 6 | 12  | 1 |

|             |       |       |   |   |     |   |       |   |   |     |   |
|-------------|-------|-------|---|---|-----|---|-------|---|---|-----|---|
|             | 290.3 | 616.9 | 5 | 6 | 4   | 0 | 657.3 | 5 | 6 | 12  | 1 |
|             | 290.4 | 616.8 | 5 | 6 | 4   | 0 | 657.1 | 5 | 6 | 12  | 1 |
|             | 290.5 | 616.5 | 5 | 6 | 4   | 0 | 656.8 | 5 | 6 | 12  | 1 |
|             | 290.6 | 616.4 | 5 | 6 | 4   | 0 | 656.8 | 5 | 6 | 12  | 1 |
| V124/3rd    | 336.1 | 616.6 | 5 | 6 | 4   | 0 | 657.0 | 5 | 6 | 12  | 1 |
|             | 336.2 | 616.7 | 5 | 6 | 4   | 0 | 657.1 | 5 | 6 | 12  | 1 |
|             | 336.3 | 617.0 | 5 | 6 | 4   | 0 | 657.2 | 5 | 6 | 12  | 1 |
|             | 336.4 | 616.8 | 5 | 6 | 4   | 0 | 657.1 | 5 | 6 | 12  | 1 |
|             | 336.5 | 616.7 | 5 | 6 | 4   | 0 | 656.9 | 5 | 6 | 12  | 1 |
|             | 336.6 | 616.6 | 5 | 6 | 4   | 0 | 656.8 | 5 | 6 | 12  | 1 |
|             |       |       |   |   |     |   |       |   |   |     |   |
| <b>cc60</b> |       |       |   |   |     |   |       |   |   |     |   |
| V113/1st    | 113.1 | 458.6 | 5 | 6 | 13* | 0 | 700.5 | 5 | 6 | 11* | 0 |
|             | 113.2 | 433.2 | 5 | 6 | 8   | 0 | 700.6 | 5 | 6 | 11  | 0 |
|             | 113.3 | 458.7 | 5 | 6 | 13  | 0 | 700.7 | 5 | 6 | 11  | 0 |
|             | 113.4 | 433.2 | 5 | 6 | 8   | 0 | 700.5 | 5 | 6 | 11  | 0 |
|             | 113.5 | 443.3 | 5 | 6 | 10  | 0 | 700.7 | 5 | 6 | 11  | 0 |
|             | 113.6 | 443.2 | 5 | 6 | 10  | 0 | 700.5 | 5 | 6 | 11  | 0 |
| V113/2nd    | 281.1 | 443.6 | 5 | 6 | 10  | 0 | 700.9 | 5 | 6 | 11  | 0 |
|             | 282.2 | 443.6 | 5 | 6 | 10  | 0 | 701.0 | 5 | 6 | 11  | 0 |
|             | 282.3 | 443.7 | 5 | 6 | 10  | 0 | 701.0 | 5 | 6 | 11  | 0 |
|             | 282.4 | 438.6 | 5 | 6 | 9   | 1 | 701.0 | 5 | 6 | 11  | 0 |
|             | 282.5 | 443.6 | 5 | 6 | 10  | 0 | 700.9 | 5 | 6 | 11  | 0 |
|             | 282.6 | 443.6 | 5 | 6 | 10  | 0 | 700.9 | 5 | 6 | 11  | 0 |
|             |       |       |   |   |     |   |       |   |   |     |   |
| V114/1st    | 114.1 | 448.4 | 5 | 6 | 11  | 0 | 705.8 | 5 | 6 | 12  | 1 |
|             | 114.2 | 438.3 | 5 | 6 | 9   | 1 | 690.7 | 5 | 6 | 9   | 1 |
|             | 114.3 | 438.3 | 5 | 6 | 9   | 1 | 700.6 | 5 | 6 | 11  | 0 |
|             | 114.4 | 438.3 | 5 | 6 | 9   | 1 | 700.8 | 5 | 6 | 11  | 0 |
|             | 114.5 | 448.4 | 5 | 6 | 11  | 0 | 705.6 | 5 | 6 | 12  | 1 |
|             | 114.6 | 448.4 | 5 | 6 | 11  | 0 | 705.6 | 5 | 6 | 12  | 1 |

|          |        |       |   |   |    |   |       |   |   |    |   |
|----------|--------|-------|---|---|----|---|-------|---|---|----|---|
|          | 114.7  | 438.4 | 5 | 6 | 9  | 1 | 705.8 | 5 | 6 | 12 | 1 |
|          | 114.8  | 443.4 | 5 | 6 | 10 | 0 | 706.0 | 5 | 6 | 12 | 1 |
|          | 114.9  | 443.4 | 5 | 6 | 10 | 0 | 705.8 | 5 | 6 | 12 | 1 |
|          | 114.10 | 443.4 | 5 | 6 | 10 | 0 | 705.8 | 5 | 6 | 12 | 1 |
|          | 114.11 | 438.3 | 5 | 6 | 9  | 1 | 700.6 | 5 | 6 | 11 | 0 |
|          | 114.12 | 438.4 | 5 | 6 | 9  | 1 | 700.8 | 5 | 6 | 11 | 0 |
|          | 114.13 | 438.3 | 5 | 6 | 9  | 1 | 705.6 | 5 | 6 | 12 | 1 |
|          | 114.14 | 438.3 | 5 | 6 | 9  | 1 | 700.6 | 5 | 6 | 11 | 0 |
|          | 114.16 | 443.7 | 5 | 6 | 10 | 0 | 706.1 | 5 | 6 | 12 | 1 |
|          | 114.18 | 443.8 | 5 | 6 | 10 | 0 | 706.1 | 5 | 6 | 12 | 1 |
| V114/2nd | 283.1  | 448.3 | 5 | 6 | 11 | 0 | 705.4 | 5 | 6 | 12 | 1 |
|          | 283.2  | 448.8 | 5 | 6 | 11 | 0 | 706.2 | 5 | 6 | 12 | 1 |
|          | 283.3  | 448.8 | 5 | 6 | 11 | 0 | 706.1 | 5 | 6 | 12 | 1 |
|          | 283.4  | 448.4 | 5 | 6 | 11 | 0 | 705.6 | 5 | 6 | 12 | 1 |
|          | 283.5  | 448.7 | 5 | 6 | 11 | 0 | 706.0 | 5 | 6 | 12 | 1 |
|          | 283.6  | 448.8 | 5 | 6 | 11 | 0 | 706.0 | 5 | 6 | 12 | 1 |
| V114/3rd | 330.1  | 438.1 | 5 | 6 | 9  | 1 | 700.5 | 5 | 6 | 11 | 0 |
|          | 330.2  | 438.2 | 5 | 6 | 9  | 1 | 700.4 | 5 | 6 | 11 | 0 |
|          | 330.3  | 438.6 | 5 | 6 | 9  | 1 | 700.8 | 5 | 6 | 11 | 0 |
|          | 330.4  | 438.5 | 5 | 6 | 9  | 1 | 700.7 | 5 | 6 | 11 | 0 |
|          | 330.5  | 438.3 | 5 | 6 | 9  | 1 | 700.5 | 5 | 6 | 11 | 0 |
|          | 330.6  | 438.1 | 5 | 6 | 9  | 1 | 700.5 | 5 | 6 | 11 | 0 |
|          | 330.7  | 438.3 | 5 | 6 | 9  | 1 | 700.7 | 5 | 6 | 11 | 0 |
|          | 330.8  | 438.4 | 5 | 6 | 9  | 1 | 700.8 | 5 | 6 | 11 | 0 |
|          | 330.9  | 438.4 | 5 | 6 | 9  | 1 | 700.6 | 5 | 6 | 11 | 0 |
|          | 330,10 | 438.4 | 5 | 6 | 9  | 1 | 695.7 | 5 | 6 | 10 | 0 |
|          | 330.11 | 438.4 | 5 | 6 | 9  | 1 | 700.8 | 5 | 6 | 11 | 0 |
|          | 330.12 | 438.3 | 5 | 6 | 9  | 1 | 700.7 | 5 | 6 | 11 | 0 |
|          | 330.15 | 438.7 | 5 | 6 | 9  | 1 | 701.0 | 5 | 6 | 11 | 0 |
|          | 330.16 | 438.7 | 5 | 6 | 9  | 1 | 701.1 | 5 | 6 | 11 | 0 |

|          |        |       |   |   |    |   |       |   |   |    |   |
|----------|--------|-------|---|---|----|---|-------|---|---|----|---|
|          | 330.17 | 438.7 | 5 | 6 | 9  | 1 | 701.1 | 5 | 6 | 11 | 0 |
|          | 330.18 | 438.8 | 5 | 6 | 9  | 1 | 701.0 | 5 | 6 | 11 | 0 |
|          | 330.19 | 438.7 | 5 | 6 | 9  | 1 | 701.1 | 5 | 6 | 11 | 0 |
|          | 330.20 | 438.7 | 5 | 6 | 9  | 1 | 701.1 | 5 | 6 | 11 | 0 |
|          |        |       |   |   |    |   |       |   |   |    |   |
| V115/1st | 115.1  | 433.2 | 5 | 6 | 8  | 0 | 705.6 | 5 | 6 | 12 | 1 |
|          | 115.2  | 433.2 | 5 | 6 | 8  | 0 | 690.6 | 5 | 6 | 9  | 1 |
|          | 115.3  | 443.3 | 5 | 6 | 10 | 0 | 705.7 | 5 | 6 | 12 | 1 |
|          | 115.4  | 443.4 | 5 | 6 | 10 | 0 | 705.6 | 5 | 6 | 12 | 1 |
|          | 115.5  | 443.3 | 5 | 6 | 10 | 0 | 700.6 | 5 | 6 | 11 | 0 |
|          | 115.6  | 443.3 | 5 | 6 | 10 | 0 | 700.6 | 5 | 6 | 11 | 0 |
| V115/2nd | 282.1  | 433.3 | 5 | 6 | 8  | 0 | 700.5 | 5 | 6 | 11 | 0 |
|          | 282.2  | 443.7 | 5 | 6 | 10 | 0 | 690.9 | 5 | 6 | 9  | 1 |
|          | 282.3  | 433.6 | 5 | 6 | 8  | 0 | 701.0 | 5 | 6 | 11 | 0 |
|          | 282.4  | 433.6 | 5 | 6 | 8  | 0 | 701.1 | 5 | 6 | 11 | 0 |
|          | 282.5  | 433.6 | 5 | 6 | 8  | 0 | 701.0 | 5 | 6 | 11 | 0 |
|          | 282.6  | 433.6 | 5 | 6 | 8  | 0 | 701.0 | 5 | 6 | 11 | 0 |
|          |        |       |   |   |    |   |       |   |   |    |   |
| V134/1st | 134.1  | 433.1 | 5 | 6 | 8  | 0 | 705.5 | 5 | 6 | 12 | 1 |
|          | 134.2  | 433.2 | 5 | 6 | 8  | 0 | 700.6 | 5 | 6 | 11 | 0 |
|          | 134.3  | 433.2 | 5 | 6 | 8  | 0 | 700.6 | 5 | 6 | 11 | 0 |
|          | 134.4  | 433.2 | 5 | 6 | 8  | 0 | 700.6 | 5 | 6 | 11 | 0 |
|          | 134.6  | 433.2 | 5 | 6 | 8  | 0 | 720.8 | 5 | 6 | 15 | 1 |
|          | 134.7  | 433.2 | 5 | 6 | 8  | 0 | 700.7 | 5 | 6 | 11 | 0 |
|          | 134.8  | 433.3 | 5 | 6 | 8  | 0 | 700.7 | 5 | 6 | 11 | 0 |
|          | 134.9  | 433.3 | 5 | 6 | 8  | 0 | 700.7 | 5 | 6 | 11 | 0 |
|          | 134.10 | 433.4 | 5 | 6 | 8  | 0 | 700.7 | 5 | 6 | 11 | 0 |
|          | 134.11 | 433.3 | 5 | 6 | 8  | 0 | 700.7 | 5 | 6 | 11 | 0 |
|          | 134.12 | 433.3 | 5 | 6 | 8  | 0 | 700.6 | 5 | 6 | 11 | 0 |
|          | 134.13 | 433.3 | 5 | 6 | 8  | 0 | 700.7 | 5 | 6 | 11 | 0 |
|          | 134.14 | 433.1 | 5 | 6 | 8  | 0 | 700.5 | 5 | 6 | 11 | 0 |

|          |        |       |   |   |    |   |       |   |   |    |   |
|----------|--------|-------|---|---|----|---|-------|---|---|----|---|
|          | 134.16 | 433.6 | 5 | 6 | 8  | 0 | 701.2 | 5 | 6 | 11 | 0 |
|          | 134.17 | 433.6 | 5 | 6 | 8  | 0 | 701.1 | 5 | 6 | 11 | 0 |
|          | 134.18 | 443.8 | 5 | 6 | 10 | 0 | 706.1 | 5 | 6 | 12 | 1 |
| V134/2nd | 295.1  | 448.7 | 5 | 6 | 11 | 0 | 705.6 | 5 | 6 | 12 | 1 |
|          | 295.2  | 448.8 | 5 | 6 | 11 | 0 | 706.0 | 5 | 6 | 12 | 1 |
|          | 295.3  | 433.3 | 5 | 6 | 8  | 0 | 705.6 | 5 | 6 | 12 | 1 |
|          | 295.4  | 448.4 | 5 | 6 | 11 | 0 | 705.5 | 5 | 6 | 12 | 1 |
|          | 295.5  | 432.9 | 5 | 6 | 8  | 0 | 705.0 | 5 | 6 | 12 | 1 |
|          | 295.6  | 433.6 | 5 | 6 | 8  | 0 | 720.6 | 5 | 6 | 15 | 1 |
| V134/3rd | 333.1  | 433.1 | 5 | 6 | 8  | 0 | 705.5 | 5 | 6 | 12 | 1 |
|          | 333.2  | 433.1 | 5 | 6 | 8  | 0 | 705.5 | 5 | 6 | 12 | 1 |
|          | 333.3  | 433.6 | 5 | 6 | 8  | 0 | 706.0 | 5 | 6 | 12 | 1 |
|          | 333.4  | 433.5 | 5 | 6 | 8  | 0 | 706.0 | 5 | 6 | 12 | 1 |
|          | 333.5  | 433.1 | 5 | 6 | 8  | 0 | 705.4 | 5 | 6 | 12 | 1 |
|          | 333.6  | 433.0 | 5 | 6 | 8  | 0 | 705.4 | 5 | 6 | 12 | 1 |
|          | 333.7  | 433.3 | 5 | 6 | 8  | 0 | 705.8 | 5 | 6 | 12 | 1 |
|          | 333.8  | 433.4 | 5 | 6 | 8  | 0 | 705.9 | 5 | 6 | 12 | 1 |
|          | 333.9  | 433.5 | 5 | 6 | 8  | 0 | 705.9 | 5 | 6 | 12 | 1 |
|          | 333,10 | 433.5 | 5 | 6 | 8  | 0 | 705.9 | 5 | 6 | 12 | 1 |
|          | 333.11 | 433.4 | 5 | 6 | 8  | 0 | 705.8 | 5 | 6 | 12 | 1 |
|          | 333.12 | 433.4 | 5 | 6 | 8  | 0 | 705.8 | 5 | 6 | 12 | 1 |
|          | 333.13 | 433.4 | 5 | 6 | 8  | 0 | 705.7 | 5 | 6 | 12 | 1 |
|          | 333.14 | 433.2 | 5 | 6 | 8  | 0 | 705.6 | 5 | 6 | 12 | 1 |
|          | 333.15 | 433.6 | 5 | 6 | 8  | 0 | 706.2 | 5 | 6 | 12 | 1 |
|          | 333.16 | 433.7 | 5 | 6 | 8  | 0 | 706.2 | 5 | 6 | 12 | 1 |
|          | 333.17 | 433.7 | 5 | 6 | 8  | 0 | 706.1 | 5 | 6 | 12 | 1 |
|          | 333.18 | 433.7 | 5 | 6 | 8  | 0 | 706.1 | 5 | 6 | 12 | 1 |
|          | 333.19 | 433.7 | 5 | 6 | 8  | 0 | 706.2 | 5 | 6 | 12 | 1 |
|          | 333,20 | 433.7 | 5 | 6 | 8  | 0 | 706.2 | 5 | 6 | 12 | 1 |
|          |        |       |   |   |    |   |       |   |   |    |   |
| V185/1st | 185.1  | 463.6 | 5 | 6 | 13 | 0 | 438.2 | 5 | 6 | 8  | 0 |

|          |        |       |   |   |     |   |       |   |   |    |   |
|----------|--------|-------|---|---|-----|---|-------|---|---|----|---|
|          | 185.2  | 463.7 | 5 | 6 | 13  | 0 | 438.2 | 5 | 6 | 8  | 0 |
|          | 185.3  | 463.6 | 5 | 6 | 13* | 0 | 438.2 | 5 | 6 | 8  | 0 |
|          | 185.4  | 463.7 | 5 | 6 | 13  | 0 | 438.2 | 5 | 6 | 8  | 0 |
|          | 185.5  | 463.6 | 5 | 6 | 13  | 0 | 438.2 | 5 | 6 | 8* | 0 |
|          | 185.6  | 464.1 | 5 | 6 | 13  | 0 | 438.7 | 5 | 6 | 8  | 0 |
|          | 185.8  | 463.7 | 5 | 6 | 13  | 0 | 438.2 | 5 | 6 | 8  | 0 |
|          | 185.9  | 463.7 | 5 | 6 | 13  | 0 | 438.2 | 5 | 6 | 8  | 0 |
|          | 185,10 | 463.8 | 5 | 6 | 13  | 0 | 438.4 | 5 | 6 | 8  | 0 |
|          | 185.11 | 463.7 | 5 | 6 | 13  | 0 | 438.3 | 5 | 6 | 8  | 0 |
|          | 185.12 | 463.8 | 5 | 6 | 13  | 0 | 438.3 | 5 | 6 | 8  | 0 |
|          | 185.13 | 463.7 | 5 | 6 | 13  | 0 | 438.3 | 5 | 6 | 8  | 0 |
|          | 185.14 | 463.7 | 5 | 6 | 13  | 0 | 438.2 | 5 | 6 | 8  | 0 |
|          | 185.15 | 463.6 | 5 | 6 | 13  | 0 | 438.1 | 5 | 6 | 8  | 0 |
|          | 185.16 | 464.0 | 5 | 6 | 13  | 0 | 438.6 | 5 | 6 | 8  | 0 |
|          | 185.17 | 464.1 | 5 | 6 | 13  | 0 | 438.7 | 5 | 6 | 8  | 0 |
|          | 185.18 | 464.1 | 5 | 6 | 13  | 0 | 438.7 | 5 | 6 | 8  | 0 |
|          | 185.19 | 464.2 | 5 | 6 | 13  | 0 | 438.7 | 5 | 6 | 8  | 0 |
|          | 185,20 | 464.1 | 5 | 6 | 13  | 0 | 438.7 | 5 | 6 | 8  | 0 |
| V185/2nd | 306.1  | 463.5 | 5 | 6 | 13  | 0 | 438.1 | 5 | 6 | 8  | 0 |
|          | 306.2  | 473.8 | 5 | 6 | 15  | 1 | 438.2 | 5 | 6 | 8  | 0 |
|          | 306.3  | 463.7 | 5 | 6 | 13  | 0 | 438.2 | 5 | 6 | 8  | 0 |
|          | 306.4  | 463.7 | 5 | 6 | 13  | 0 | 438.2 | 5 | 6 | 8  | 0 |
|          | 306.5  | 463.6 | 5 | 6 | 13  | 0 | 438.1 | 5 | 6 | 8  | 0 |
|          | 306.6  | 463.6 | 5 | 6 | 13  | 0 | 438.2 | 5 | 6 | 8  | 0 |
| V185/4th | 456.1  | 453.6 | 5 | 6 | 11  | 0 | 438.4 | 5 | 6 | 8  | 0 |
|          | 456.2  | 453.7 | 5 | 6 | 11  | 0 | 438.5 | 5 | 6 | 8  | 0 |
|          | 456.3  | 458.8 | 5 | 6 | 12  | 1 | 438.5 | 5 | 6 | 8  | 0 |
|          | 456.4  | 458.9 | 5 | 6 | 12  | 1 | 438.5 | 5 | 6 | 8  | 0 |
|          | 456.5  | 453.7 | 5 | 6 | 11  | 0 | 438.5 | 5 | 6 | 8  | 0 |
|          | 456.6  | 453.7 | 5 | 6 | 11  | 0 | 438.4 | 5 | 6 | 8  | 0 |
|          | 456.7  | 453.9 | 5 | 6 | 11  | 0 | 438.3 | 5 | 6 | 8  | 0 |

|              |        |       |   |   |     |   |       |   |   |     |   |
|--------------|--------|-------|---|---|-----|---|-------|---|---|-----|---|
|              | 456.8  | 458.4 | 5 | 6 | 12  | 1 | 438.1 | 5 | 6 | 8   | 0 |
|              | 456.9  | 458.5 | 5 | 6 | 12  | 1 | 438.2 | 5 | 6 | 8   | 0 |
|              | 456.10 | 458.5 | 5 | 6 | 12  | 1 | 438.2 | 5 | 6 | 8   | 0 |
|              | 456.11 | 453.5 | 5 | 6 | 11  | 0 | 438.2 | 5 | 6 | 8   | 0 |
|              | 456.12 | 458.5 | 5 | 6 | 12  | 1 | 438.2 | 5 | 6 | 8   | 0 |
|              | 456.13 | 453.5 | 5 | 6 | 11  | 0 | 438.2 | 5 | 6 | 8   | 0 |
|              | 456.14 | 458.4 | 5 | 6 | 12  | 1 | 438.1 | 5 | 6 | 8   | 0 |
|              | 456.16 | 458.9 | 5 | 6 | 12  | 1 | 438.5 | 5 | 6 | 8   | 0 |
|              | 456.17 | 458.9 | 5 | 6 | 12  | 1 | 438.6 | 5 | 6 | 8   | 0 |
|              | 456.18 | 453.9 | 5 | 6 | 11  | 0 | 438.6 | 5 | 6 | 8   | 0 |
|              | 456.19 | 458.9 | 5 | 6 | 12  | 1 | 438.6 | 5 | 6 | 8   | 0 |
|              | 456.20 | 458.9 | 5 | 6 | 12  | 1 | 438.6 | 5 | 6 | 8   | 0 |
|              |        |       |   |   |     |   |       |   |   |     |   |
| <b>cc174</b> |        |       |   |   |     |   |       |   |   |     |   |
| V51/1st      | 51.1   | 450.7 | 5 | 6 | 12* | 1 | 655.7 | 5 | 6 | 10* | 0 |
|              | 51.2   | 450.7 | 5 | 6 | 12  | 1 | 655.7 | 5 | 6 | 10  | 0 |
|              | 51.3   | 450.8 | 5 | 6 | 12  | 1 | 655.9 | 5 | 6 | 10  | 0 |
|              | 51.4   | 450.8 | 5 | 6 | 12  | 1 | 655.7 | 5 | 6 | 10  | 0 |
|              | 51.5   | 450.7 | 5 | 6 | 12  | 1 | 655.8 | 5 | 6 | 10  | 0 |
|              | 51.6   | 450.8 | 5 | 6 | 12  | 1 | 655.9 | 5 | 6 | 10  | 0 |
| V51/2nd      | 236.1  | 450.6 | 5 | 6 | 12  | 1 | 655.7 | 5 | 6 | 10  | 0 |
|              | 236.2  | 460.9 | 5 | 6 | 14  | 0 | 650.5 | 5 | 6 | 9   | 1 |
|              | 236.3  | 445.6 | 5 | 6 | 11  | 0 | 665.9 | 5 | 6 | 12  | 1 |
|              | 236.4  | 455.8 | 5 | 6 | 13  | 0 | 655.8 | 5 | 6 | 10  | 0 |
|              | 236.5  | 445.6 | 5 | 6 | 11  | 0 | 665.9 | 5 | 6 | 12  | 1 |
|              | 236.6  | 445.7 | 5 | 6 | 11  | 0 | 665.9 | 5 | 6 | 12  | 1 |
| V51/3rd      | 354.1  | 465.7 | 5 | 6 | 15  | 1 | 655.5 | 5 | 6 | 10  | 0 |
|              | 354.2  | 465.8 | 5 | 6 | 15  | 1 | 655.4 | 5 | 6 | 10  | 0 |
|              | 354.3  | 465.7 | 5 | 6 | 15  | 1 | 655.3 | 5 | 6 | 10  | 0 |
|              | 254.4  | 465.7 | 5 | 6 | 15  | 1 | 655.6 | 5 | 6 | 10  | 0 |
|              | 254.5  | 445.3 | 5 | 6 | 11  | 0 | 665.5 | 5 | 6 | 12  | 1 |

|         |       |       |   |   |     |   |       |   |   |     |   |
|---------|-------|-------|---|---|-----|---|-------|---|---|-----|---|
|         | 254.6 | 465.7 | 5 | 6 | 15  | 1 | 655.5 | 5 | 6 | 10  | 0 |
| V51/4th | 424.1 | 445.6 | 5 | 6 | 11  | 0 | 665.8 | 5 | 6 | 12  | 1 |
|         | 424.2 | 445.5 | 5 | 6 | 11  | 0 | 665.4 | 5 | 6 | 12  | 1 |
|         | 424.3 | 445.6 | 5 | 6 | 11* | 0 | 665.6 | 5 | 6 | 12* | 1 |
|         | 424.4 | 445.5 | 5 | 6 | 11  | 0 | 665.6 | 5 | 6 | 12  | 1 |
|         | 424.5 | 445.5 | 5 | 6 | 11  | 0 | 665.7 | 5 | 6 | 12  | 1 |
|         | 424.6 | 445.5 | 5 | 6 | 11  | 0 | 665.6 | 5 | 6 | 12  | 1 |
|         |       |       |   |   |     |   |       |   |   |     |   |
| V52/1st | 52.1  | 445.8 | 5 | 6 | 11  | 0 | 656.1 | 5 | 6 | 10  | 0 |
|         | 52.2  | 445.8 | 5 | 6 | 11  | 0 | 651.0 | 5 | 6 | 9   | 1 |
|         | 52.3  | 445.8 | 5 | 6 | 11  | 0 | 656.0 | 5 | 6 | 10  | 0 |
|         | 52.4  | 445.8 | 5 | 6 | 11  | 0 | 656.0 | 5 | 6 | 10  | 0 |
|         | 52.5  | 445.7 | 5 | 6 | 11  | 0 | 655.8 | 5 | 6 | 10  | 0 |
|         | 52.6  | 445.7 | 5 | 6 | 11  | 0 | 655.9 | 5 | 6 | 10  | 0 |
| V52/2nd | 238.1 | 460.5 | 5 | 6 | 14  | 0 | 665.0 | 5 | 6 | 12  | 1 |
|         | 238.2 | 445.8 | 5 | 6 | 11  | 0 | 666.1 | 5 | 6 | 12  | 1 |
|         | 238.3 | 445.8 | 5 | 6 | 11  | 0 | 650.9 | 5 | 6 | 9   | 1 |
|         | 238.4 | 445.8 | 5 | 6 | 11  | 0 | 651.0 | 5 | 6 | 9   | 1 |
|         | 238.5 | 460.4 | 5 | 6 | 14  | 0 | 665.2 | 5 | 6 | 12  | 1 |
|         | 238.6 | 445.8 | 5 | 6 | 11  | 0 | 650.9 | 5 | 6 | 9   | 1 |
| V52/3rd | 342.1 | 445.7 | 5 | 6 | 11  | 0 | 655.8 | 5 | 6 | 10  | 0 |
|         |       |       |   |   |     |   |       |   |   |     |   |
| V58/1st | 58.1  | 445.8 | 5 | 6 | 11  | 0 | 650.9 | 5 | 6 | 9   | 1 |
|         | 58.2  | 445.8 | 5 | 6 | 11  | 0 | 650.8 | 5 | 6 | 9   | 1 |
|         | 58.3  | 455.9 | 5 | 6 | 13  | 0 | 655.9 | 5 | 6 | 10  | 0 |
|         | 58.4  | 445.8 | 5 | 6 | 11  | 0 | 650.8 | 5 | 6 | 9   | 1 |
|         | 58.5  | 445.8 | 5 | 6 | 11  | 0 | 650.9 | 5 | 6 | 9   | 1 |
|         | 58.6  | 456.0 | 5 | 6 | 13  | 0 | 656.1 | 5 | 6 | 10  | 0 |
| V58/2nd | 240.1 | 445.1 | 5 | 6 | 11  | 0 | 644.7 | 5 | 6 | 8   | 0 |
| V58/4th | 429.1 | 445.8 | 5 | 6 | 11  | 0 | 645.9 | 5 | 6 | 8   | 0 |
|         | 492.2 | 445.8 | 5 | 6 | 11  | 0 | 645.9 | 5 | 6 | 8   | 0 |

|         |       |       |   |   |    |   |       |   |   |    |   |
|---------|-------|-------|---|---|----|---|-------|---|---|----|---|
|         | 429.3 | 445.8 | 5 | 6 | 11 | 0 | 645.8 | 5 | 6 | 8  | 0 |
|         | 429.4 | 445.8 | 5 | 6 | 11 | 0 | 645.6 | 5 | 6 | 8  | 0 |
|         | 429.5 | 445.7 | 5 | 6 | 11 | 0 | 645.6 | 5 | 6 | 8  | 0 |
|         | 429.6 | 445.8 | 5 | 6 | 11 | 0 | 645.7 | 5 | 6 | 8  | 0 |
|         |       |       |   |   |    |   |       |   |   |    |   |
| V59/1st | 59.1  | 450.5 | 5 | 6 | 12 | 1 | 655.4 | 5 | 6 | 10 | 0 |
|         | 59.2  | 450.6 | 5 | 6 | 12 | 1 | 655.5 | 5 | 6 | 10 | 0 |
|         | 59.3  | 450.6 | 5 | 6 | 12 | 1 | 655.5 | 5 | 6 | 10 | 0 |
|         | 59.4  | 450.6 | 5 | 6 | 12 | 1 | 660.6 | 5 | 6 | 11 | 0 |
|         | 59.5  | 450.0 | 5 | 6 | 12 | 1 | 655.5 | 5 | 6 | 10 | 0 |
|         | 59.6  | 450.5 | 5 | 6 | 12 | 1 | 655.4 | 5 | 6 | 10 | 0 |
|         | 59.11 | 451.1 | 5 | 6 | 12 | 1 | 655.8 | 5 | 6 | 10 | 0 |
|         | 59.12 | 451.2 | 5 | 6 | 12 | 1 | 656.1 | 5 | 6 | 10 | 0 |
|         | 59.13 | 451.1 | 5 | 6 | 12 | 1 | 656.1 | 5 | 6 | 10 | 0 |
|         | 59.14 | 451.1 | 5 | 6 | 12 | 1 | 656.0 | 5 | 6 | 10 | 0 |
|         | 59.15 | 451.1 | 5 | 6 | 12 | 1 | 656.0 | 5 | 6 | 10 | 0 |
|         | 59.16 | 451.1 | 5 | 6 | 12 | 1 | 655.9 | 5 | 6 | 10 | 0 |
|         | 59.17 | 451.1 | 5 | 6 | 12 | 1 | 655.9 | 5 | 6 | 10 | 0 |
|         | 59.18 | 451.0 | 5 | 6 | 12 | 1 | 655.9 | 5 | 6 | 10 | 0 |
|         | 59.20 | 451.4 | 5 | 6 | 12 | 1 | 656.5 | 5 | 6 | 10 | 0 |
| V59/2nd | 253.1 | 445.4 | 5 | 6 | 11 | 0 | 655.3 | 5 | 6 | 10 | 0 |
|         | 253.2 | 445.4 | 5 | 6 | 11 | 0 | 655.4 | 5 | 6 | 10 | 0 |
|         | 253.3 | 445.4 | 5 | 6 | 11 | 0 | 655.4 | 5 | 6 | 10 | 0 |
|         | 253.4 | 445.4 | 5 | 6 | 11 | 0 | 655.4 | 5 | 6 | 10 | 0 |
|         | 253.5 | 445.5 | 5 | 6 | 11 | 0 | 660.6 | 5 | 6 | 11 | 0 |
|         | 253.6 | 445.4 | 5 | 6 | 11 | 0 | 655.4 | 5 | 6 | 10 | 0 |
| V59/3rd | 352.1 | 445.3 | 5 | 6 | 11 | 0 | 655.1 | 5 | 6 | 10 | 0 |
|         | 352.2 | 445.3 | 5 | 6 | 11 | 0 | 655.1 | 5 | 6 | 10 | 0 |
|         | 352.3 | 450.4 | 5 | 6 | 12 | 1 | 655.2 | 5 | 6 | 10 | 0 |
|         | 352.4 | 445.3 | 5 | 6 | 11 | 0 | 655.1 | 5 | 6 | 10 | 0 |
|         | 352.5 | 450.3 | 5 | 6 | 12 | 1 | 655.1 | 5 | 6 | 10 | 0 |

|          |        |       |   |   |    |   |       |   |   |    |   |
|----------|--------|-------|---|---|----|---|-------|---|---|----|---|
|          | 352.6  | 450.4 | 5 | 6 | 12 | 1 | 655.1 | 5 | 6 | 10 | 0 |
|          | 352.7  | 446.0 | 5 | 6 | 11 | 0 | 656.0 | 5 | 6 | 10 | 0 |
|          | 352.8  | 451.1 | 5 | 6 | 12 | 1 | 656.1 | 5 | 6 | 10 | 0 |
|          | 352.9  | 446.0 | 5 | 6 | 11 | 0 | 655.9 | 5 | 6 | 10 | 0 |
|          | 352.10 | 446.0 | 5 | 6 | 11 | 0 | 661.2 | 5 | 6 | 11 | 0 |
|          | 352.11 | 451.1 | 5 | 6 | 12 | 1 | 655.9 | 5 | 6 | 10 | 0 |
|          | 352.12 | 446.0 | 5 | 6 | 11 | 0 | 656.0 | 5 | 6 | 10 | 0 |
|          | 352.13 | 445.9 | 5 | 6 | 11 | 0 | 655.9 | 5 | 6 | 10 | 0 |
|          | 352.14 | 440.8 | 5 | 6 | 10 | 0 | 655.8 | 5 | 6 | 10 | 0 |
|          | 352.15 | 451.3 | 5 | 6 | 12 | 1 | 656.3 | 5 | 6 | 10 | 0 |
|          | 352.16 | 456.5 | 5 | 6 | 13 | 0 | 656.3 | 5 | 6 | 10 | 0 |
|          | 352.17 | 446.4 | 5 | 6 | 11 | 0 | 656.4 | 5 | 6 | 10 | 0 |
|          | 352.18 | 446.4 | 5 | 6 | 11 | 0 | 656.5 | 5 | 6 | 10 | 0 |
|          | 352.19 | 451.4 | 5 | 6 | 12 | 1 | 656.4 | 5 | 6 | 10 | 0 |
|          | 352.20 | 451.4 | 5 | 6 | 12 | 1 | 656.4 | 5 | 6 | 10 | 0 |
| V59/4th  | 438.1  | 445.3 | 5 | 6 | 11 | 0 | 655.3 | 5 | 6 | 10 | 0 |
|          | 438.2  | 445.3 | 5 | 6 | 11 | 0 | 655.3 | 5 | 6 | 10 | 0 |
|          | 438.3  | 450.4 | 5 | 6 | 12 | 1 | 655.2 | 5 | 6 | 10 | 0 |
|          | 438.4  | 450.4 | 5 | 6 | 12 | 1 | 655.1 | 5 | 6 | 10 | 0 |
|          | 438.5  | 445.2 | 5 | 6 | 11 | 0 | 655.1 | 5 | 6 | 10 | 0 |
|          | 438.6  | 450.7 | 5 | 6 | 12 | 1 | 655.5 | 5 | 6 | 10 | 0 |
|          |        |       |   |   |    |   |       |   |   |    |   |
| V138/1st | 138.1  | 455.6 | 5 | 6 | 13 | 0 | 654.7 | 5 | 6 | 10 | 0 |
|          | 138.2  | 460.6 | 5 | 6 | 14 | 0 | 653.7 | 5 | 6 | 10 | 0 |
|          | 138.4  | 460.6 | 5 | 6 | 14 | 0 | 655.1 | 5 | 6 | 10 | 0 |
|          | 138.5  | 445.3 | 5 | 6 | 11 | 0 | 654.1 | 5 | 6 | 10 | 0 |
|          | 138.6  | 440.7 | 5 | 6 | 10 | 0 | 656.0 | 5 | 6 | 10 | 0 |
| V138/2nd | 288.1  | 445.7 | 5 | 6 | 11 | 0 | 666.1 | 5 | 6 | 12 | 1 |
|          | 288.2  | 445.8 | 5 | 6 | 11 | 0 | 666.1 | 5 | 6 | 12 | 1 |
|          | 288.3  | 445.7 | 5 | 6 | 11 | 0 | 666.0 | 5 | 6 | 12 | 1 |
|          | 288.4  | 445.7 | 5 | 6 | 11 | 0 | 666.0 | 5 | 6 | 12 | 1 |

|         |         |       |   |   |    |   |       |   |   |     |   |
|---------|---------|-------|---|---|----|---|-------|---|---|-----|---|
|         | 288.5   | 445.6 | 5 | 6 | 11 | 0 | 665.9 | 5 | 6 | 12  | 1 |
|         | 288.6   | 440.6 | 5 | 6 | 10 | 0 | 666.0 | 5 | 6 | 12  | 1 |
|         |         |       |   |   |    |   |       |   |   |     |   |
| V88/1st | N88.1.1 | 672.6 | 5 | 6 | 9* | 1 | 677.7 | 5 | 6 | 10  | 0 |
|         | N88.1.2 | 672.6 | 5 | 6 | 9  | 1 | 677.6 | 5 | 6 | 10  | 0 |
|         | N88.1.3 | 672.6 | 5 | 6 | 9  | 1 | 677.7 | 5 | 6 | 10  | 0 |
|         | N88.1.4 | 672.6 | 5 | 6 | 9  | 1 | 677.7 | 5 | 6 | 10  | 0 |
|         | N88.1.5 | 672.5 | 5 | 6 | 9  | 1 | 677.6 | 5 | 6 | 10  | 0 |
|         | N88.1.6 | 672.6 | 5 | 6 | 9  | 1 | 677.7 | 5 | 6 | 10* | 0 |
|         | 88.1.7  | 673.6 | 5 | 6 | 9  | 1 | 678.5 | 5 | 6 | 10  | 0 |
|         | 88.1.8  | 673.6 | 5 | 6 | 9  | 1 | 678.6 | 5 | 6 | 10  | 0 |
|         | 88.1.9  | 673.7 | 5 | 6 | 9  | 1 | 678.8 | 5 | 6 | 10  | 0 |
|         | 88.1.10 | 673.5 | 5 | 6 | 9  | 1 | 678.5 | 5 | 6 | 10  | 0 |
|         | 88.1    | 673.2 | 5 | 6 | 9  | 1 | 678.3 | 5 | 6 | 10  | 0 |
|         | 88.2    | 673.2 | 5 | 6 | 9  | 1 | 678.4 | 5 | 6 | 10  | 0 |
|         | 88.3    | 673.2 | 5 | 6 | 9  | 1 | 678.3 | 5 | 6 | 10  | 0 |
|         | 88.4    | 673.2 | 5 | 6 | 9  | 1 | 678.3 | 5 | 6 | 10  | 0 |
|         | 88.5    | 673.1 | 5 | 6 | 9  | 1 | 678.3 | 5 | 6 | 10  | 0 |
|         | 88.6    | 673.1 | 5 | 6 | 9  | 1 | 678.2 | 5 | 6 | 10  | 0 |
|         | 88.8    | 673.2 | 5 | 6 | 9  | 1 | 678.3 | 5 | 6 | 10  | 0 |
| V88/2nd | N272.1  | 678.0 | 5 | 6 | 10 | 0 | 678.0 | 5 | 6 | 10  | 0 |
|         | N272.2  | 678.0 | 5 | 6 | 10 | 0 | 678.0 | 5 | 6 | 10  | 0 |
|         | N272.3  | 678.0 | 5 | 6 | 10 | 0 | 678.0 | 5 | 6 | 10  | 0 |
|         | N272.4  | 678.0 | 5 | 6 | 10 | 0 | 678.0 | 5 | 6 | 10  | 0 |
|         | N272.5  | 678.0 | 5 | 6 | 10 | 0 | 678.0 | 5 | 6 | 10  | 0 |
|         | N272.6  | 676.7 | 5 | 6 | 10 | 0 | 676.7 | 5 | 6 | 10  | 0 |
| V88/3rd | N369.1  | 677.6 | 5 | 6 | 10 | 0 | 677.6 | 5 | 6 | 10  | 0 |
|         | N369.2  | 677.5 | 5 | 6 | 10 | 0 | 677.5 | 5 | 6 | 10  | 0 |
|         | N369.3  | 677.6 | 5 | 6 | 10 | 0 | 677.6 | 5 | 6 | 10  | 0 |
|         | N369.3  | 677.7 | 5 | 6 | 10 | 0 | 677.7 | 5 | 6 | 10  | 0 |
|         | N369.5  | 677.5 | 5 | 6 | 10 | 0 | 677.5 | 5 | 6 | 10  | 0 |

|         |        |       |   |   |     |   |       |   |   |     |   |
|---------|--------|-------|---|---|-----|---|-------|---|---|-----|---|
|         | N369.6 | 677.4 | 5 | 6 | 10  | 0 | 677.4 | 5 | 6 | 10  | 0 |
|         | 369.7  | 678.4 | 5 | 6 | 10  | 0 | 678.4 | 5 | 6 | 10  | 0 |
|         | 369.8  | 678.4 | 5 | 6 | 10  | 0 | 678.4 | 5 | 6 | 10  | 0 |
|         | 369.9  | 678.6 | 5 | 6 | 10  | 0 | 678.6 | 5 | 6 | 10  | 0 |
|         | 369.10 | 678.5 | 5 | 6 | 10  | 0 | 678.5 | 5 | 6 | 10  | 0 |
|         | 369.11 | 678.3 | 5 | 6 | 10  | 0 | 678.3 | 5 | 6 | 10  | 0 |
|         | 369.12 | 678.4 | 5 | 6 | 10  | 0 | 678.4 | 5 | 6 | 10  | 0 |
|         | 369.14 | 678.3 | 5 | 6 | 10  | 0 | 678.3 | 5 | 6 | 10  | 0 |
|         | 369.15 | 678.3 | 5 | 6 | 10  | 0 | 678.3 | 5 | 6 | 10  | 0 |
|         | 369.16 | 678.7 | 5 | 6 | 10  | 0 | 678.7 | 5 | 6 | 10  | 0 |
|         | 369.17 | 673.7 | 5 | 6 | 9   | 1 | 668.7 | 5 | 6 | 8   | 0 |
|         | 369.18 | 678.7 | 5 | 6 | 10  | 0 | 678.7 | 5 | 6 | 10  | 0 |
|         | 369.19 | 678.8 | 5 | 6 | 10  | 0 | 678.8 | 5 | 6 | 10  | 0 |
|         | 369.20 | 678.6 | 5 | 6 | 10  | 0 | 678.6 | 5 | 6 | 10  | 0 |
| V88/4th | N449.1 | 682.9 | 5 | 6 | 11* | 0 | 687.7 | 5 | 6 | 12* | 1 |
|         | 449.2  | 677.8 | 5 | 6 | 10  | 0 | 682.9 | 5 | 6 | 11  | 0 |
|         | 449.3  | 683.1 | 5 | 6 | 11  | 0 | 688.0 | 5 | 6 | 12  | 1 |
|         | 449.4  | 683.1 | 5 | 6 | 11  | 0 | 688.0 | 5 | 6 | 12  | 1 |
|         | 449.5  | 678.0 | 5 | 6 | 10  | 0 | 688.1 | 5 | 6 | 12  | 1 |
|         | 449.6  | 677.9 | 5 | 6 | 10  | 0 | 682.9 | 5 | 6 | 11  | 0 |
|         |        |       |   |   |     |   |       |   |   |     |   |
| V43/2nd | 241.1  | 450.9 | 5 | 6 | 12  | 1 | 655.9 | 5 | 6 | 10  | 0 |
|         | 241.2  | 456.0 | 5 | 6 | 13  | 0 | 655.9 | 5 | 6 | 10  | 0 |
| V43/3rd | 349.1  | 450.8 | 5 | 6 | 12  | 1 | 655.8 | 5 | 6 | 10  | 0 |
|         | 349.2  | 450.9 | 5 | 6 | 12  | 1 | 655.9 | 5 | 6 | 10  | 0 |
|         | 349.3  | 450.9 | 5 | 6 | 12  | 1 | 656.1 | 5 | 6 | 10  | 0 |
|         | 349.4  | 450.9 | 5 | 6 | 12  | 1 | 656.0 | 5 | 6 | 10  | 0 |
|         | 349.5  | 451.0 | 5 | 6 | 12  | 1 | 656.0 | 5 | 6 | 10  | 0 |
|         | 349.6  | 450.9 | 5 | 6 | 12  | 1 | 656.1 | 5 | 6 | 10  | 0 |

<sup>1</sup>Fragments sizes were determined using either a GS500LIZ size standard. <sup>2</sup>Opa genes contain short C and A tracts adjacent to the 5'CTCTT repeat tract, these short tracts are invariant within a given strains as detected in all Sanger sequences of PCR products spanning the Opa repeats and in whole genome sequence data. <sup>3</sup>Asterisks indicate repeat numbers

confirmed by dideoxy Sanger sequencing of PCR products. <sup>4</sup>Expression states, 1=1, 0=0 (all genes are subject to translational phase variation).

Supplementary Data Table V. Repeat numbers and expression states for the phase-variable *opaD* and *opaJ* genes

| Carrier/<br>Time pt  | Isolate | <i>opaD</i>       |                      |                      |                         |                          | <i>opaJ</i> (5'CTCTT) |                      |                      |                         |                          |
|----------------------|---------|-------------------|----------------------|----------------------|-------------------------|--------------------------|-----------------------|----------------------|----------------------|-------------------------|--------------------------|
|                      |         | Size <sup>1</sup> | C tract <sup>2</sup> | A tract <sup>2</sup> | Repeat No. <sup>3</sup> | Exp. States <sup>4</sup> | Size <sup>1</sup>     | C tract <sup>2</sup> | A tract <sup>2</sup> | Repeat No. <sup>3</sup> | Exp. States <sup>4</sup> |
| <b>cc23</b>          |         |                   |                      |                      |                         |                          |                       |                      |                      |                         |                          |
| V222/1 <sup>st</sup> | 222.1   | 426.7             | 5                    | 6                    | 8*                      | 0                        | 627.0                 | 5                    | 6                    | 8*                      | 0                        |
|                      | 222.2   | 426.7             | 5                    | 6                    | 8                       | 0                        | 627.0                 | 5                    | 6                    | 8                       | 0                        |
|                      | 222.3   | 426.1             | 5                    | 6                    | 8                       | 0                        | 626.4                 | 5                    | 6                    | 8                       | 0                        |
|                      | 222.4   | 426.1             | 5                    | 6                    | 8                       | 0                        | 626.6                 | 5                    | 6                    | 8                       | 0                        |
|                      | 222.5   | 426.1             | 5                    | 6                    | 8                       | 0                        | 625.5                 | 5                    | 6                    | 8                       | 0                        |
|                      | 222.6   | 426.2             | 5                    | 6                    | 8                       | 0                        | 626.5                 | 5                    | 6                    | 8                       | 0                        |
| V222/2 <sup>nd</sup> | 309.1   | 426.5             | 5                    | 6                    | 8                       | 0                        | 627.0                 | 5                    | 6                    | 8                       | 0                        |
|                      | 309.2   | 426.7             | 5                    | 6                    | 8                       | 0                        | 627.1                 | 5                    | 6                    | 8                       | 0                        |
|                      | 309.3   | 426.6             | 5                    | 6                    | 8                       | 0                        | 627.1                 | 5                    | 6                    | 8                       | 0                        |
|                      | 309.4   | 426.7             | 5                    | 6                    | 8                       | 0                        | 632.2                 | 5                    | 6                    | 9                       | 1                        |
|                      | 309.5   | 426.1             | 5                    | 6                    | 8                       | 0                        | 626.5                 | 5                    | 6                    | 8                       | 0                        |
|                      | 309.6   | 426.6             | 5                    | 6                    | 8                       | 0                        | 627.1                 | 5                    | 6                    | 8                       | 0                        |
| V222/3 <sup>rd</sup> | 391.1   | 426.5             | 5                    | 6                    | 8                       | 0                        | 639.5                 | 3                    | 6                    | 8                       | 1                        |
|                      | 391.2   | 426.5             | 5                    | 6                    | 8                       | 0                        | 639.2                 | 3                    | 6                    | 8                       | 1                        |
|                      | 391.3   | 426.8             | 5                    | 6                    | 8                       | 0                        | 639.5                 | 3                    | 6                    | 8                       | 1                        |
|                      | 391.4   | 426.6             | 5                    | 6                    | 8                       | 0                        | 639.6                 | 3                    | 6                    | 8                       | 1                        |
|                      | 391.5   | 426.5             | 5                    | 6                    | 8                       | 0                        | 639.4                 | 3                    | 6                    | 8                       | 1                        |
|                      | 391.6   | 426.6             | 5                    | 6                    | 8                       | 0                        | 640.2                 | 3                    | 6                    | 8                       | 1                        |
| V222/4 <sup>th</sup> | 459.1   | 426.6             | 5                    | 6                    | 8                       | 0                        | 639.4                 | 3                    | 6                    | 8                       | 1                        |
|                      | 459.2   | 426.5             | 5                    | 6                    | 8                       | 0                        | 639.4                 | 3                    | 6                    | 8                       | 1                        |
|                      | 459.4   | 426.1             | 5                    | 6                    | 8                       | 0                        | 640.0                 | 3                    | 6                    | 8                       | 1                        |
|                      | 459.4   | 426.1             | 5                    | 6                    | 8                       | 0                        | 639.6                 | 3                    | 6                    | 8                       | 1                        |
|                      | 459.5   | 426.1             | 5                    | 6                    | 8*                      | 0                        | 639.5                 | 3                    | 6                    | 8*                      | 1                        |
|                      | 459.6   | 426.2             | 5                    | 6                    | 8                       | 0                        | 640.3                 | 3                    | 6                    | 8                       | 1                        |
|                      |         |                   |                      |                      |                         |                          |                       |                      |                      |                         |                          |
| V96/2 <sup>nd</sup>  | 259.1   | 426.4             | 5                    | 6                    | 8                       | 0                        | 626.4                 | 5                    | 6                    | 8                       | 0                        |
|                      | 259.2   | 426.3             | 5                    | 6                    | 8                       | 0                        | 626.4                 | 5                    | 6                    | 8                       | 0                        |

|         |       |       |   |   |   |   |       |   |   |    |   |
|---------|-------|-------|---|---|---|---|-------|---|---|----|---|
|         | 259.3 | 426.4 | 5 | 6 | 8 | 0 | 626.7 | 5 | 6 | 8  | 0 |
|         | 259.4 | 426.4 | 5 | 6 | 8 | 0 | 626.8 | 5 | 6 | 8  | 0 |
|         | 259.5 | 426.4 | 5 | 6 | 8 | 0 | 626.8 | 5 | 6 | 8  | 0 |
|         | 259.6 | 426.3 | 5 | 6 | 8 | 0 | 627.1 | 5 | 6 | 8  | 0 |
| V96/3rd | 370.2 | 426.8 | 5 | 6 | 8 | 0 | 647.4 | 5 | 6 | 12 | 1 |
|         | 370.3 | 421.9 | 5 | 6 | 7 | 0 | 627.5 | 5 | 6 | 8  | 0 |
|         | 370.4 | 426.8 | 5 | 6 | 8 | 0 | 647.4 | 5 | 6 | 12 | 1 |
|         | 370.5 | 426.8 | 5 | 6 | 8 | 0 | 622.4 | 5 | 6 | 7  | 0 |
|         | 370.6 | 421.7 | 5 | 6 | 7 | 0 | 647.5 | 5 | 6 | 12 | 1 |
| V96/4th | 445.1 | 426.2 | 5 | 6 | 8 | 0 | 626.8 | 5 | 6 | 8  | 0 |
|         | 445.2 | 426.2 | 5 | 6 | 8 | 0 | 626.3 | 5 | 6 | 8  | 0 |
|         | 445.3 | 426.3 | 5 | 6 | 8 | 0 | 626.9 | 5 | 6 | 8  | 0 |
|         | 445.4 | 426.3 | 5 | 6 | 8 | 0 | 626.8 | 5 | 6 | 8  | 0 |
|         | 445.5 | 426.2 | 5 | 6 | 8 | 0 | 627.1 | 5 | 6 | 8  | 0 |
|         | 445.6 | 426.3 | 5 | 6 | 8 | 0 | 626.7 | 5 | 6 | 8  | 0 |
|         |       |       |   |   |   |   |       |   |   |    |   |
| V69/2nd | 258.1 | 426.3 | 5 | 6 | 8 | 0 | 626.6 | 5 | 6 | 8  | 0 |
|         | 258.2 | 426.4 | 5 | 6 | 8 | 0 | 626.9 | 5 | 6 | 8  | 0 |
|         | 258.3 | 426.3 | 5 | 6 | 8 | 0 | 626.7 | 5 | 6 | 8  | 0 |
|         | 258.4 | 426.8 | 5 | 6 | 8 | 0 | 627.3 | 5 | 6 | 8  | 0 |
|         | 258.5 | 426.7 | 5 | 6 | 8 | 0 | 627.2 | 5 | 6 | 8  | 0 |
|         | 258.6 | 426.2 | 5 | 6 | 8 | 0 | 626.6 | 5 | 6 | 8  | 0 |
| V69/4th | 431.1 | 431.6 | 5 | 6 | 9 | 1 | 626.8 | 5 | 6 | 8  | 0 |
|         | 431.2 | 426.5 | 5 | 6 | 8 | 0 | 626.9 | 5 | 6 | 8  | 0 |
|         | 431.3 | 426.6 | 5 | 6 | 8 | 0 | 626.8 | 5 | 6 | 8  | 0 |
|         | 431.4 | 426.8 | 5 | 6 | 8 | 0 | 627.1 | 5 | 6 | 8  | 0 |
|         | 431.5 | 426.8 | 5 | 6 | 8 | 0 | 627.0 | 5 | 6 | 8  | 0 |
|         | 431.6 | 426.8 | 5 | 6 | 8 | 0 | 627.1 | 5 | 6 | 8  | 0 |
|         |       |       |   |   |   |   |       |   |   |    |   |
| V93/2nd | 264.1 | 421.7 | 5 | 6 | 7 | 0 | 622.0 | 5 | 6 | 7  | 0 |
|         | 264.2 | 421.7 | 5 | 6 | 7 | 0 | 622.1 | 5 | 6 | 7  | 0 |

|                      |       |       |   |   |    |   |       |   |   |    |   |
|----------------------|-------|-------|---|---|----|---|-------|---|---|----|---|
|                      | 264.3 | 421.3 | 5 | 6 | 7  | 0 | 621.7 | 5 | 6 | 7  | 0 |
|                      | 264.4 | 421.6 | 5 | 6 | 7  | 0 | 622.0 | 5 | 6 | 7  | 0 |
|                      | 264.5 | 421.6 | 5 | 6 | 7  | 0 | 621.7 | 5 | 6 | 7  | 0 |
|                      | 264.6 | 421.1 | 5 | 6 | 7  | 0 | 621.5 | 5 | 6 | 7  | 0 |
| V93/3rd              | 359.1 | 421.9 | 5 | 6 | 7  | 0 | 622.2 | 5 | 6 | 7  | 0 |
|                      | 359.2 | 421.8 | 5 | 6 | 7  | 0 | 622.3 | 5 | 6 | 7  | 0 |
|                      | 359.3 | 421.5 | 5 | 6 | 7  | 0 | 621.9 | 5 | 6 | 7  | 0 |
|                      | 359.4 | 421.7 | 5 | 6 | 7  | 0 | 622.3 | 5 | 6 | 7  | 0 |
|                      | 359.5 | 421.8 | 5 | 6 | 7  | 0 | 622.2 | 5 | 6 | 7  | 0 |
|                      | 359.6 | 421.4 | 5 | 6 | 7  | 0 | 621.7 | 5 | 6 | 7  | 0 |
|                      |       |       |   |   |    |   |       |   |   |    |   |
| <b>cc167</b>         |       |       |   |   |    |   |       |   |   |    |   |
| V117/1st             | 117.1 | 420.6 | 5 | 6 | 4  | 0 | 616.5 | 5 | 6 | 4  | 0 |
|                      | 117.2 | 420.5 | 5 | 6 | 4* | 0 | 616.7 | 5 | 6 | 4* | 0 |
| V117/2 <sup>nd</sup> | 284.1 | 421.0 | 5 | 6 | 4  | 0 | 617.0 | 5 | 6 | 4  | 0 |
|                      | 284.2 | 421.1 | 5 | 6 | 4  | 0 | 612.0 | 5 | 6 | 3  | 1 |
|                      | 284.3 | 421.1 | 5 | 6 | 4  | 0 | 617.1 | 5 | 6 | 4  | 0 |
|                      | 284.4 | 421.0 | 5 | 6 | 4  | 0 | 611.8 | 5 | 6 | 3  | 1 |
|                      | 284.5 | 421.0 | 5 | 6 | 4  | 0 | 616.9 | 5 | 6 | 4  | 0 |
|                      | 284.6 | 421.0 | 5 | 6 | 4  | 0 | 611.8 | 5 | 6 | 3  | 1 |
| V117/3rd             | 332.1 | 420.6 | 5 | 6 | 4* | 0 | 611.5 | 5 | 6 | 3  | 1 |
|                      | 332.2 | 420.7 | 5 | 6 | 4  | 0 | 611.7 | 5 | 6 | 3  | 1 |
|                      | 332.3 | 420.7 | 5 | 6 | 4  | 0 | 611.7 | 5 | 6 | 3  | 1 |
|                      | 332.4 | 420.7 | 5 | 6 | 4  | 0 | 611.6 | 5 | 6 | 3  | 1 |
|                      | 332.6 | 420.6 | 5 | 6 | 4  | 0 | 611.6 | 5 | 6 | 3  | 1 |
| V117/4th             | 417.1 | 420.4 | 5 | 6 | 4  | 0 | 616.4 | 5 | 6 | 4  | 0 |
|                      | 417.2 | 421.1 | 5 | 6 | 4  | 0 | 617.1 | 5 | 6 | 4  | 0 |
|                      | 417.3 | 421.1 | 5 | 6 | 4  | 0 | 617.2 | 5 | 6 | 4  | 0 |
|                      | 417.4 | 420.4 | 5 | 6 | 4  | 0 | 616.2 | 5 | 6 | 4  | 0 |
|                      | 417.5 | 421.2 | 5 | 6 | 4  | 0 | 617.0 | 5 | 6 | 4  | 0 |
|                      | 417.6 | 421.1 | 5 | 6 | 4  | 0 | 617.1 | 5 | 6 | 4  | 0 |

|                      |       |       |   |   |   |   |       |   |   |     |   |
|----------------------|-------|-------|---|---|---|---|-------|---|---|-----|---|
| V64/1st              | 64.1  | 420.6 | 5 | 6 | 4 | 0 | 657.1 | 5 | 6 | 12* | 1 |
|                      | 64.2  | 420.6 | 5 | 6 | 4 | 0 | 657.1 | 5 | 6 | 12  | 1 |
|                      | 64.3  | 420.7 | 5 | 6 | 4 | 0 | 657.0 | 5 | 6 | 12  | 1 |
|                      | 64.4  | 420.5 | 5 | 6 | 4 | 0 | 657.2 | 5 | 6 | 12  | 1 |
|                      | 64.5  | 420.5 | 5 | 6 | 4 | 0 | 656.9 | 5 | 6 | 12  | 1 |
|                      | 64.6  | 420.6 | 5 | 6 | 4 | 0 | 657.0 | 5 | 6 | 12  | 1 |
| V64/2nd              | 257.1 | 420.5 | 5 | 6 | 4 | 0 | 651.8 | 5 | 6 | 11  | 0 |
|                      | 257.2 | 421.2 | 5 | 6 | 4 | 0 | 652.3 | 5 | 6 | 11  | 0 |
|                      | 257.3 | 421.2 | 5 | 6 | 4 | 0 | 652.2 | 5 | 6 | 11  | 0 |
|                      | 257.4 | 421.1 | 5 | 6 | 4 | 0 | 652.4 | 5 | 6 | 11  | 0 |
|                      | 257.5 | 421.1 | 5 | 6 | 4 | 0 | 652.2 | 5 | 6 | 11  | 0 |
|                      | 257.6 | 421.2 | 5 | 6 | 4 | 0 | 652.2 | 5 | 6 | 11  | 0 |
| V64/3rd              | 348.1 | 420.5 | 5 | 6 | 4 | 0 | 641.7 | 5 | 6 | 9   | 1 |
|                      | 348.2 | 420.6 | 5 | 6 | 4 | 0 | 636.8 | 5 | 6 | 8   | 0 |
|                      | 348.3 | 420.5 | 5 | 6 | 4 | 0 | 636.8 | 5 | 6 | 8   | 0 |
|                      | 348.4 | 420.6 | 5 | 6 | 4 | 0 | 636.7 | 5 | 6 | 8   | 0 |
|                      | 348.5 | 420.5 | 5 | 6 | 4 | 0 | 641.6 | 5 | 6 | 9   | 1 |
|                      | 348.6 | 420.6 | 5 | 6 | 4 | 0 | 641.4 | 5 | 6 | 9   | 1 |
|                      |       |       |   |   |   |   |       |   |   |     |   |
| V124/1st             | 124.1 | 421.0 | 5 | 6 | 4 | 0 | 617.0 | 5 | 6 | 4   | 0 |
|                      | 124.2 | 421.1 | 5 | 6 | 4 | 0 | 617.0 | 5 | 6 | 4*  | 0 |
|                      | 124.3 | 420.5 | 5 | 6 | 4 | 0 | 616.3 | 5 | 6 | 4   | 0 |
|                      | 124.4 | 420.5 | 5 | 6 | 4 | 0 | 616.3 | 5 | 6 | 4   | 0 |
|                      | 124.5 | 420.5 | 5 | 6 | 4 | 0 | 616.3 | 5 | 6 | 4   | 0 |
| V124/2 <sup>nd</sup> | 290.1 | 420.5 | 5 | 6 | 4 | 0 | 616.4 | 5 | 6 | 4   | 0 |
|                      | 290.3 | 421.0 | 5 | 6 | 4 | 0 | 616.9 | 5 | 6 | 4   | 0 |
|                      | 290.4 | 420.9 | 5 | 6 | 4 | 0 | 616.8 | 5 | 6 | 4   | 0 |
|                      | 290.5 | 420.5 | 5 | 6 | 4 | 0 | 616.5 | 5 | 6 | 4   | 0 |
|                      | 290.6 | 420.4 | 5 | 6 | 4 | 0 | 616.4 | 5 | 6 | 4   | 0 |
| V124/3rd             | 336.1 | 420.5 | 5 | 6 | 4 | 0 | 616.6 | 5 | 6 | 4   | 0 |

|                      |        |       |   |   |     |   |       |   |   |    |   |
|----------------------|--------|-------|---|---|-----|---|-------|---|---|----|---|
|                      | 336.2  | 420.7 | 5 | 6 | 4   | 0 | 616.7 | 5 | 6 | 4  | 0 |
|                      | 336.3  | 421.0 | 5 | 6 | 4   | 0 | 617.0 | 5 | 6 | 4  | 0 |
|                      | 336.4  | 420.8 | 5 | 6 | 4   | 0 | 616.8 | 5 | 6 | 4  | 0 |
|                      | 336.5  | 420.6 | 5 | 6 | 4   | 0 | 616.7 | 5 | 6 | 4  | 0 |
|                      | 336.6  | 420.5 | 5 | 6 | 4   | 0 | 616.6 | 5 | 6 | 4  | 0 |
|                      |        |       |   |   |     |   |       |   |   |    |   |
| <b>cc60</b>          |        |       |   |   |     |   |       |   |   |    |   |
| V113/1st             | 113.1  | 464.3 | 4 | 6 | 14* | 1 | 413.4 | 4 | 6 | 4* | 0 |
|                      | 113.2  | 464.4 | 4 | 6 | 14  | 1 | 413.5 | 4 | 6 | 4  | 0 |
|                      | 113.3  | 464.5 | 4 | 6 | 14  | 1 | 413.5 | 4 | 6 | 4  | 0 |
|                      | 113.4  | 464.3 | 4 | 6 | 14  | 1 | 413.4 | 4 | 6 | 4  | 0 |
|                      | 113.5  | 464.4 | 4 | 6 | 14  | 1 | 413.4 | 4 | 6 | 4  | 0 |
|                      | 113.6  | 464.3 | 4 | 6 | 14  | 1 | 413.5 | 4 | 6 | 4  | 0 |
| V113/2 <sup>nd</sup> | 281.1  | 464.7 | 4 | 6 | 14  | 1 | 413.8 | 4 | 6 | 4  | 0 |
|                      | 281.2  | 464.7 | 4 | 6 | 14  | 1 | 413.9 | 4 | 6 | 4  | 0 |
|                      | 281.3  | 464.8 | 4 | 6 | 14  | 1 | 413.9 | 4 | 6 | 4  | 0 |
|                      | 281.4  | 469.8 | 4 | 6 | 15  | 0 | 413.8 | 4 | 6 | 4  | 0 |
|                      | 281.5  | 434.3 | 4 | 6 | 8   | 1 | 413.8 | 4 | 6 | 4  | 0 |
|                      | 281.6  | 434.3 | 4 | 6 | 8   | 1 | 413.9 | 4 | 6 | 4  | 0 |
|                      |        |       |   |   |     |   |       |   |   |    |   |
| V114/1st             | 114.1  | 464.4 | 4 | 6 | 14  | 1 | 413.5 | 4 | 6 | 4  | 0 |
|                      | 114.2  | 469.5 | 4 | 6 | 15  | 0 | 413.5 | 4 | 6 | 4  | 0 |
|                      | 114.3  | 464.5 | 4 | 6 | 14  | 1 | 413.6 | 4 | 6 | 4  | 0 |
|                      | 114.4  | 459.4 | 4 | 6 | 13  | 0 | 413.5 | 4 | 6 | 4  | 0 |
|                      | 114.5  | 464.4 | 4 | 6 | 14  | 1 | 413.6 | 4 | 6 | 4  | 0 |
|                      | 114.6  | 464.5 | 4 | 6 | 14  | 1 | 413.5 | 4 | 6 | 4  | 0 |
|                      | 114.7  | 464.4 | 4 | 6 | 14  | 1 | 413.7 | 4 | 6 | 4  | 0 |
|                      | 114.8  | 464.5 | 4 | 6 | 14  | 1 | 413.5 | 4 | 6 | 4  | 0 |
|                      | 114.9  | 464.5 | 4 | 6 | 14  | 1 | 413.5 | 4 | 6 | 4  | 0 |
|                      | 114,10 | 464.5 | 4 | 6 | 14  | 1 | 413.6 | 4 | 6 | 4  | 0 |
|                      | 114.11 | 464.5 | 4 | 6 | 14  | 1 | 413.6 | 4 | 6 | 4  | 0 |

|                      |        |       |   |   |    |   |       |   |   |   |   |
|----------------------|--------|-------|---|---|----|---|-------|---|---|---|---|
|                      | 114.12 | 464.6 | 4 | 6 | 14 | 1 | 413.6 | 4 | 6 | 4 | 0 |
|                      | 114.13 | 474.6 | 4 | 6 | 16 | 0 | 413.5 | 4 | 6 | 4 | 0 |
|                      | 114.14 | 464.4 | 4 | 6 | 14 | 1 | 413.5 | 4 | 6 | 4 | 0 |
|                      | 114.16 | 464.8 | 4 | 6 | 14 | 1 | 414.4 | 4 | 6 | 4 | 0 |
|                      | 114.18 | 464.9 | 4 | 6 | 14 | 1 | 414.3 | 4 | 6 | 4 | 0 |
| V114/2 <sup>nd</sup> | 283.1  | 459.3 | 4 | 6 | 13 | 0 | 413.4 | 4 | 6 | 4 | 0 |
|                      | 283.2  | 469.9 | 4 | 6 | 15 | 0 | 414.1 | 4 | 6 | 4 | 0 |
|                      | 283.3  | 459.7 | 4 | 6 | 13 | 0 | 414.0 | 4 | 6 | 4 | 0 |
|                      | 283.4  | 459.3 | 4 | 6 | 13 | 0 | 413.1 | 4 | 6 | 4 | 0 |
|                      | 283.5  | 459.6 | 4 | 6 | 13 | 0 | 413.9 | 4 | 6 | 4 | 0 |
|                      | 283.6  | 459.7 | 4 | 6 | 13 | 0 | 414.0 | 4 | 6 | 4 | 0 |
| V114/3 <sup>rd</sup> | 330.1  | 469.3 | 4 | 6 | 15 | 0 | 413.5 | 4 | 6 | 4 | 0 |
|                      | 330.2  | 469.3 | 4 | 6 | 15 | 0 | 413.3 | 4 | 6 | 4 | 0 |
|                      | 330.3  | 469.7 | 4 | 6 | 15 | 0 | 413.8 | 4 | 6 | 4 | 0 |
|                      | 330.4  | 469.6 | 4 | 6 | 15 | 0 | 413.6 | 4 | 6 | 4 | 0 |
|                      | 330.5  | 469.4 | 4 | 6 | 15 | 0 | 413.5 | 4 | 6 | 4 | 0 |
|                      | 330.6  | 469.4 | 4 | 6 | 15 | 0 | 413.3 | 4 | 6 | 4 | 0 |
|                      | 330.7  | 469.6 | 4 | 6 | 15 | 0 | 413.5 | 4 | 6 | 4 | 0 |
|                      | 330.8  | 469.7 | 4 | 6 | 15 | 0 | 413.6 | 4 | 6 | 4 | 0 |
|                      | 330.9  | 469.6 | 4 | 6 | 15 | 0 | 413.5 | 4 | 6 | 4 | 0 |
|                      | 330,10 | 469.6 | 4 | 6 | 15 | 0 | 413.7 | 4 | 6 | 4 | 0 |
|                      | 330.11 | 469.5 | 4 | 6 | 15 | 0 | 413.6 | 4 | 6 | 4 | 0 |
|                      | 330.12 | 469.5 | 4 | 6 | 15 | 0 | 413.6 | 4 | 6 | 4 | 0 |
|                      | 330.15 | 469.9 | 4 | 6 | 15 | 0 | 414.1 | 4 | 6 | 4 | 0 |
|                      | 330.16 | 470.0 | 4 | 6 | 15 | 0 | 414.2 | 4 | 6 | 4 | 0 |
|                      | 330.17 | 470.0 | 4 | 6 | 15 | 0 | 414.2 | 4 | 6 | 4 | 0 |
|                      | 330.18 | 469.9 | 4 | 6 | 15 | 0 | 414.2 | 4 | 6 | 4 | 0 |
|                      | 330.19 | 470.0 | 4 | 6 | 15 | 0 | 414.1 | 4 | 6 | 4 | 0 |
|                      | 330.20 | 470.0 | 4 | 6 | 15 | 0 | 414.1 | 4 | 6 | 4 | 0 |
|                      |        |       |   |   |    |   |       |   |   |   |   |
| V115/1 <sup>st</sup> | 115.1  | 464.4 | 4 | 6 | 14 | 1 | 413.5 | 4 | 6 | 4 | 0 |

|                      |        |       |   |   |    |   |       |   |   |   |   |
|----------------------|--------|-------|---|---|----|---|-------|---|---|---|---|
|                      | 115.2  | 433.9 | 4 | 6 | 8  | 1 | 413.5 | 4 | 6 | 4 | 0 |
|                      | 115.3  | 464.5 | 4 | 6 | 14 | 1 | 413.5 | 4 | 6 | 4 | 0 |
|                      | 115.4  | 464.4 | 4 | 6 | 14 | 1 | 413.6 | 4 | 6 | 4 | 0 |
|                      | 115.5  | 464.3 | 4 | 6 | 14 | 1 | 413.6 | 4 | 6 | 4 | 0 |
|                      | 115.6  | 464.3 | 4 | 6 | 14 | 1 | 413.5 | 4 | 6 | 4 | 0 |
| V115/2 <sup>nd</sup> | 282.1  | 464.4 | 4 | 6 | 14 | 1 | 413.4 | 4 | 6 | 4 | 0 |
|                      | 282.2  | 469.9 | 4 | 6 | 15 | 0 | 414.1 | 4 | 6 | 4 | 0 |
|                      | 282.3  | 464.8 | 4 | 6 | 14 | 1 | 414.0 | 4 | 6 | 4 | 0 |
|                      | 282.4  | 464.8 | 4 | 6 | 14 | 1 | 414.1 | 4 | 6 | 4 | 0 |
|                      | 282.5  | 464.8 | 4 | 6 | 14 | 1 | 414.0 | 4 | 6 | 4 | 0 |
|                      | 282.6  | 464.9 | 4 | 6 | 14 | 1 | 414.0 | 4 | 6 | 4 | 0 |
|                      |        |       |   |   |    |   |       |   |   |   |   |
| V134/1 <sup>st</sup> | 134.1  | 464.3 | 4 | 6 | 14 | 1 | 413.4 | 4 | 6 | 4 | 0 |
|                      | 134.2  | 459.3 | 4 | 6 | 13 | 0 | 413.5 | 4 | 6 | 4 | 0 |
|                      | 134.3  | 459.2 | 4 | 6 | 13 | 0 | 413.4 | 4 | 6 | 4 | 0 |
|                      | 134.4  | 459.3 | 4 | 6 | 13 | 0 | 413.5 | 4 | 6 | 4 | 0 |
|                      | 134.6  | 459.2 | 4 | 6 | 13 | 0 | 413.5 | 4 | 6 | 4 | 0 |
|                      | 134.7  | 459.4 | 4 | 6 | 13 | 0 | 413.6 | 4 | 6 | 4 | 0 |
|                      | 134.8  | 459.4 | 4 | 6 | 13 | 0 | 413.5 | 4 | 6 | 4 | 0 |
|                      | 134.9  | 459.4 | 4 | 6 | 13 | 0 | 413.6 | 4 | 6 | 4 | 0 |
|                      | 134,10 | 459.4 | 4 | 6 | 13 | 0 | 413.6 | 4 | 6 | 4 | 0 |
|                      | 134.11 | 459.4 | 4 | 6 | 13 | 0 | 413.5 | 4 | 6 | 4 | 0 |
|                      | 134.12 | 459.3 | 4 | 6 | 13 | 0 | 413.5 | 4 | 6 | 4 | 0 |
|                      | 134.13 | 459.3 | 4 | 6 | 13 | 0 | 413.3 | 4 | 6 | 4 | 0 |
|                      | 134.14 | 459.3 | 4 | 6 | 13 | 0 | 413.5 | 4 | 6 | 4 | 0 |
|                      | 134.16 | 459.7 | 4 | 6 | 13 | 0 | 414.2 | 4 | 6 | 4 | 0 |
|                      | 134.17 | 459.8 | 4 | 6 | 13 | 0 | 414.2 | 4 | 6 | 4 | 0 |
|                      | 134.18 | 464.9 | 4 | 6 | 14 | 1 | 414.3 | 4 | 6 | 4 | 0 |
| V134/2 <sup>nd</sup> | 295.1  | 464.3 | 4 | 6 | 14 | 1 | 413.5 | 4 | 6 | 4 | 0 |
|                      | 295.2  | 464.8 | 4 | 6 | 14 | 1 | 414.0 | 4 | 6 | 4 | 0 |
|                      | 295.3  | 459.3 | 4 | 6 | 13 | 0 | 413.5 | 4 | 6 | 4 | 0 |

|          |        |       |   |   |    |   |       |   |   |   |   |
|----------|--------|-------|---|---|----|---|-------|---|---|---|---|
|          | 295.4  | 464.4 | 4 | 6 | 14 | 1 | 413.5 | 4 | 6 | 4 | 0 |
|          | 295.5  | 459.2 | 4 | 6 | 13 | 0 | 413.6 | 4 | 6 | 4 | 0 |
|          | 295.6  | 464.7 | 4 | 6 | 14 | 1 | 413.8 | 4 | 6 | 4 | 0 |
| V134/3rd | 333.1  | 459.3 | 4 | 6 | 13 | 0 | 413.4 | 4 | 6 | 4 | 0 |
|          | 333.2  | 459.3 | 4 | 6 | 13 | 0 | 413.3 | 4 | 6 | 4 | 0 |
|          | 333.3  | 459.7 | 4 | 6 | 13 | 0 | 413.8 | 4 | 6 | 4 | 0 |
|          | 333.4  | 459.5 | 4 | 6 | 13 | 0 | 413.7 | 4 | 6 | 4 | 0 |
|          | 333.5  | 459.3 | 4 | 6 | 13 | 0 | 413.4 | 4 | 6 | 4 | 0 |
|          | 333.6  | 459.2 | 4 | 6 | 13 | 0 | 413.4 | 4 | 6 | 4 | 0 |
|          | 333.7  | 459.4 | 4 | 6 | 13 | 0 | 413.7 | 4 | 6 | 4 | 0 |
|          | 333.8  | 459.4 | 4 | 6 | 13 | 0 | 413.6 | 4 | 6 | 4 | 0 |
|          | 333.9  | 459.5 | 4 | 6 | 13 | 0 | 413.7 | 4 | 6 | 4 | 0 |
|          | 333.10 | 459.6 | 4 | 6 | 13 | 0 | 413.7 | 4 | 6 | 4 | 0 |
|          | 333.11 | 459.6 | 4 | 6 | 13 | 0 | 413.6 | 4 | 6 | 4 | 0 |
|          | 333.12 | 459.4 | 4 | 6 | 13 | 0 | 413.7 | 4 | 6 | 4 | 0 |
|          | 333.13 | 464.5 | 4 | 6 | 14 | 0 | 413.6 | 4 | 6 | 4 | 0 |
|          | 333.14 | 459.4 | 4 | 6 | 13 | 0 | 413.5 | 4 | 6 | 4 | 0 |
|          | 333.15 | 459.7 | 4 | 6 | 13 | 0 | 414.1 | 4 | 6 | 4 | 0 |
|          | 333.16 | 459.8 | 4 | 6 | 13 | 0 | 414.2 | 4 | 6 | 4 | 0 |
|          | 333.17 | 459.9 | 4 | 6 | 13 | 0 | 414.2 | 4 | 6 | 4 | 0 |
|          | 333.18 | 459.9 | 4 | 6 | 13 | 0 | 414.2 | 4 | 6 | 4 | 0 |
|          | 333.19 | 459.8 | 4 | 6 | 13 | 0 | 414.1 | 4 | 6 | 4 | 0 |
|          | 333.20 | 459.7 | 4 | 6 | 13 | 0 | 414.1 | 4 | 6 | 4 | 0 |
|          |        |       |   |   |    |   |       |   |   |   |   |
| V185/1st | 185.1  | 438.8 | 4 | 6 | 9  | 0 | 428.8 | 4 | 6 | 7 | 0 |
|          | 185.2  | 438.9 | 4 | 6 | 9  | 0 | 429.0 | 4 | 6 | 7 | 0 |
|          | 185.3  | 438.9 | 4 | 6 | 9* | 0 | 428.9 | 4 | 6 | 7 | 0 |
|          | 185.4  | 439.0 | 4 | 6 | 9  | 0 | 429.0 | 4 | 6 | 7 | 0 |
|          | 185.5  | 439.0 | 4 | 6 | 9  | 0 | 428.9 | 4 | 6 | 7 | 0 |
|          | 185.6  | 438.9 | 4 | 6 | 9  | 0 | 428.9 | 4 | 6 | 7 | 0 |
|          | 185.8  | 438.9 | 4 | 6 | 9  | 0 | 428.9 | 4 | 6 | 7 | 0 |

|                      |        |       |   |   |    |   |       |   |   |   |   |
|----------------------|--------|-------|---|---|----|---|-------|---|---|---|---|
|                      | 185.9  | 439.2 | 4 | 6 | 9  | 0 | 429.1 | 4 | 6 | 7 | 0 |
|                      | 185.10 | 439.1 | 4 | 6 | 9  | 0 | 428.9 | 4 | 6 | 7 | 0 |
|                      | 185.11 | 439.0 | 4 | 6 | 9  | 0 | 428.8 | 4 | 6 | 7 | 0 |
|                      | 185.12 | 439.0 | 4 | 6 | 9  | 0 | 429.0 | 4 | 6 | 7 | 0 |
|                      | 185.13 | 438.9 | 4 | 6 | 9  | 0 | 428.9 | 4 | 6 | 7 | 0 |
|                      | 185.14 | 438.9 | 4 | 6 | 9  | 0 | 429.0 | 4 | 6 | 7 | 0 |
|                      | 185.15 | 438.8 | 4 | 6 | 9  | 0 | 428.6 | 4 | 6 | 7 | 0 |
|                      | 185.16 | 439.3 | 4 | 6 | 9  | 0 | 429.3 | 4 | 6 | 7 | 0 |
|                      | 185.17 | 439.3 | 4 | 6 | 9  | 0 | 429.3 | 4 | 6 | 7 | 0 |
|                      | 185.18 | 439.4 | 4 | 6 | 9  | 0 | 429.3 | 4 | 6 | 7 | 0 |
|                      | 185.19 | 439.4 | 4 | 6 | 9  | 0 | 429.3 | 4 | 6 | 7 | 0 |
|                      | 185.20 | 439.4 | 4 | 6 | 9  | 0 | 429.4 | 4 | 6 | 7 | 0 |
| V185/2 <sup>nd</sup> | 306.1  | 443.9 | 4 | 6 | 10 | 0 | 428.9 | 4 | 6 | 7 | 0 |
|                      | 306.2  | 443.9 | 4 | 6 | 10 | 0 | 428.8 | 4 | 6 | 7 | 0 |
|                      | 306.3  | 449.1 | 4 | 6 | 11 | 1 | 428.8 | 4 | 6 | 7 | 0 |
|                      | 306.4  | 444.0 | 4 | 6 | 10 | 0 | 428.9 | 4 | 6 | 7 | 0 |
|                      | 306.5  | 443.9 | 4 | 6 | 10 | 0 | 428.8 | 4 | 6 | 7 | 0 |
|                      | 306.6  | 449.0 | 4 | 6 | 11 | 1 | 428.8 | 4 | 6 | 7 | 0 |
| V185/4 <sup>th</sup> | 456.1  | 448.9 | 4 | 6 | 11 | 1 | 428.7 | 4 | 6 | 7 | 0 |
|                      | 456.2  | 448.9 | 4 | 6 | 11 | 1 | 428.7 | 4 | 6 | 7 | 0 |
|                      | 456.3  | 459.2 | 4 | 6 | 13 | 0 | 429.0 | 4 | 6 | 7 | 0 |
|                      | 456.4  | 459.2 | 4 | 6 | 13 | 0 | 428.7 | 4 | 6 | 7 | 0 |
|                      | 456.5  | 459.2 | 4 | 6 | 13 | 0 | 428.8 | 4 | 6 | 7 | 0 |
|                      | 456.6  | 449.0 | 4 | 6 | 11 | 1 | 428.7 | 4 | 6 | 7 | 0 |
|                      | 456.7  | 449.2 | 4 | 6 | 11 | 1 | 429.5 | 4 | 6 | 7 | 0 |
|                      | 456.8  | 459.2 | 4 | 6 | 13 | 0 | 428.7 | 4 | 6 | 7 | 0 |
|                      | 456.9  | 459.3 | 4 | 6 | 13 | 0 | 428.6 | 4 | 6 | 7 | 0 |
|                      | 456.10 | 459.2 | 4 | 6 | 13 | 0 | 428.8 | 4 | 6 | 7 | 0 |
|                      | 456.11 | 449.1 | 4 | 6 | 11 | 1 | 428.9 | 4 | 6 | 7 | 0 |
|                      | 456.12 | 459.2 | 4 | 6 | 13 | 0 | 428.9 | 4 | 6 | 7 | 0 |
|                      | 456.13 | 449.1 | 4 | 6 | 11 | 1 | 428.7 | 4 | 6 | 7 | 0 |

|              |        |       |   |   |    |   |       |   |   |    |   |
|--------------|--------|-------|---|---|----|---|-------|---|---|----|---|
|              | 456.14 | 459.2 | 4 | 6 | 13 | 0 | 428.9 | 4 | 6 | 7  | 0 |
|              | 456.16 | 459.5 | 4 | 6 | 13 | 0 | 428.9 | 4 | 6 | 7  | 0 |
|              | 456.17 | 459.6 | 4 | 6 | 13 | 0 | 429.0 | 4 | 6 | 7  | 0 |
|              | 456.18 | 449.5 | 4 | 6 | 11 | 1 | 429.1 | 4 | 6 | 7  | 0 |
|              | 456.19 | 459.6 | 4 | 6 | 13 | 0 | 429.3 | 4 | 6 | 7  | 0 |
|              | 456.20 | 459.7 | 4 | 6 | 13 | 0 | 429.3 | 4 | 6 | 7  | 0 |
|              |        |       |   |   |    |   |       |   |   |    |   |
| <b>cc174</b> |        |       |   |   |    |   |       |   |   |    |   |
| V51/1ST      | 51.1   | 640.8 | 5 | 6 | 8* | 0 | 433.7 | 5 | 5 | 7* | 0 |
|              | 51.2   | 641.1 | 5 | 6 | 8  | 0 | 438.7 | 5 | 5 | 8  | 1 |
|              | 51.3   | 646.0 | 5 | 6 | 9  | 1 | 438.9 | 5 | 5 | 8  | 1 |
|              | 51.4   | 646.1 | 5 | 6 | 9  | 1 | 438.7 | 5 | 5 | 8  | 1 |
|              | 51.5   | 640.9 | 5 | 6 | 8  | 0 | 438.7 | 5 | 5 | 8  | 1 |
|              | 51.6   | 646.0 | 5 | 6 | 9  | 1 | 438.6 | 5 | 5 | 8  | 1 |
| V51/2nd      | 236.1  | 641.0 | 5 | 6 | 8  | 0 | 438.7 | 5 | 5 | 8  | 1 |
|              | 236.2  | 641.0 | 5 | 6 | 8  | 0 | 443.8 | 5 | 5 | 9  | 0 |
|              | 236.3  | 641.1 | 5 | 6 | 8  | 0 | 433.8 | 5 | 5 | 7  | 0 |
|              | 236.4  | 641.1 | 5 | 6 | 8  | 0 | 438.7 | 5 | 5 | 8  | 1 |
|              | 236.5  | 641.1 | 5 | 6 | 8  | 0 | 433.7 | 5 | 5 | 7  | 0 |
|              | 236.6  | 641.1 | 5 | 6 | 8  | 0 | 433.7 | 5 | 5 | 7  | 0 |
| V51/3rd      | 354.1  | 640.8 | 5 | 6 | 8  | 0 | 443.6 | 5 | 5 | 9  | 0 |
|              | 354.2  | 641.0 | 5 | 6 | 8  | 0 | 443.6 | 5 | 5 | 9  | 0 |
|              | 354.3  | 640.9 | 5 | 6 | 8  | 0 | 443.6 | 5 | 5 | 9  | 0 |
|              | 254.4  | 641.0 | 5 | 6 | 8  | 0 | 443.7 | 5 | 5 | 9  | 0 |
|              | 254.5  | 641.0 | 5 | 6 | 8  | 0 | 433.6 | 5 | 5 | 7  | 0 |
|              | 254.6  | 640.9 | 5 | 6 | 8  | 0 | 443.6 | 5 | 5 | 9  | 0 |
| V51/4th      | 424.1  | 640.9 | 5 | 6 | 8  | 0 | 433.6 | 5 | 5 | 7  | 0 |
|              | 424.2  | 640.9 | 5 | 6 | 8  | 0 | 433.5 | 5 | 5 | 7  | 0 |
|              | 424.3  | 640.9 | 5 | 6 | 8* | 0 | 433.6 | 5 | 5 | 7* | 0 |
|              | 424.4  | 640.9 | 5 | 6 | 8  | 0 | 433.4 | 5 | 5 | 7  | 0 |
|              | 424.5  | 640.9 | 5 | 6 | 8  | 0 | 433.6 | 5 | 5 | 7  | 0 |

|         |       |       |   |   |   |   |       |   |   |    |   |
|---------|-------|-------|---|---|---|---|-------|---|---|----|---|
|         | 424.6 | 640.8 | 5 | 6 | 8 | 0 | 438.5 | 5 | 5 | 8  | 1 |
| V52/1st | 52.1  | 641.3 | 5 | 6 | 8 | 0 | 439.0 | 5 | 5 | 8  | 1 |
|         | 52.2  | 641.1 | 5 | 6 | 8 | 0 | 438.9 | 5 | 5 | 8  | 1 |
|         | 52.3  | 641.2 | 5 | 6 | 8 | 0 | 439.0 | 5 | 5 | 8  | 1 |
|         | 52.4  | 641.2 | 5 | 6 | 8 | 0 | 439.0 | 5 | 5 | 8  | 1 |
|         | 52.5  | 641.1 | 5 | 6 | 8 | 0 | 438.8 | 5 | 5 | 8  | 1 |
|         | 52.6  | 641.1 | 5 | 6 | 8 | 0 | 438.9 | 5 | 5 | 8  | 1 |
| V52/2nd | 238.1 | 640.2 | 5 | 6 | 8 | 0 | 432.9 | 5 | 5 | 7  | 0 |
|         | 238.2 | 641.2 | 5 | 6 | 8 | 0 | 433.9 | 5 | 5 | 7  | 0 |
|         | 238.3 | 641.2 | 5 | 6 | 8 | 0 | 449.2 | 5 | 5 | 10 | 0 |
|         | 238.4 | 641.3 | 5 | 6 | 8 | 0 | 434.0 | 5 | 5 | 7  | 0 |
|         | 238.5 | 640.0 | 5 | 6 | 8 | 0 | 443.2 | 5 | 5 | 9  | 0 |
|         | 238.6 | 641.3 | 5 | 6 | 8 | 0 | 449.1 | 5 | 5 | 10 | 0 |
| V52/3rd | 342.1 | 641.1 | 5 | 6 | 8 | 0 | 438.8 | 5 | 5 | 8  | 1 |
| V58/1st | 58.1  | 646.3 | 5 | 6 | 9 | 1 | 444.0 | 5 | 5 | 9  | 0 |
|         | 58.2  | 646.2 | 5 | 6 | 9 | 1 | 444.0 | 5 | 5 | 9  | 0 |
|         | 58.3  | 641.2 | 5 | 6 | 8 | 0 | 438.8 | 5 | 5 | 8  | 1 |
|         | 58.4  | 646.2 | 5 | 6 | 9 | 1 | 443.8 | 5 | 5 | 9  | 0 |
|         | 58.5  | 645.6 | 5 | 6 | 9 | 1 | 443.0 | 5 | 5 | 9  | 0 |
|         | 58.6  | 641.3 | 5 | 6 | 8 | 0 | 439.0 | 5 | 5 | 8  | 1 |
| V58/2nd | 240.1 | 640.3 | 5 | 6 | 8 | 0 | 437.9 | 5 | 5 | 8  | 1 |
| V58/3rd | 429.1 | 641.2 | 5 | 6 | 8 | 0 | 438.9 | 5 | 5 | 8  | 1 |
|         | 492.2 | 641.1 | 5 | 6 | 8 | 0 | 438.9 | 5 | 5 | 8  | 1 |
|         | 429.3 | 641.2 | 5 | 6 | 8 | 0 | 438.9 | 5 | 5 | 8  | 1 |
|         | 429.4 | 641.1 | 5 | 6 | 8 | 0 | 438.8 | 5 | 5 | 8  | 1 |
|         | 429.5 | 641.1 | 5 | 6 | 8 | 0 | 438.8 | 5 | 5 | 8  | 1 |
|         | 429.6 | 641.1 | 5 | 6 | 8 | 0 | 438.8 | 5 | 5 | 8  | 1 |
| V59/1st | 59.1  | 640.7 | 5 | 6 | 8 | 0 | 433.5 | 5 | 5 | 7  | 0 |

|         |        |       |   |   |   |   |       |   |   |   |   |
|---------|--------|-------|---|---|---|---|-------|---|---|---|---|
|         | 59.2   | 640.7 | 5 | 6 | 8 | 0 | 438.5 | 5 | 5 | 8 | 1 |
|         | 59.3   | 640.8 | 5 | 6 | 8 | 0 | 443.5 | 5 | 5 | 9 | 0 |
|         | 59.4   | 640.7 | 5 | 6 | 8 | 0 | 438.4 | 5 | 5 | 8 | 1 |
|         | 59.5   | 640.5 | 5 | 6 | 8 | 0 | 433.2 | 5 | 5 | 7 | 0 |
|         | 59.6   | 640.6 | 5 | 6 | 8 | 0 | 433.3 | 5 | 5 | 7 | 0 |
|         | 59.11  | 640.6 | 5 | 6 | 8 | 0 | 433.2 | 5 | 5 | 7 | 0 |
|         | 59.12  | 640.8 | 5 | 6 | 8 | 0 | 433.4 | 5 | 5 | 7 | 0 |
|         | 59.13  | 640.8 | 5 | 6 | 8 | 0 | 433.2 | 5 | 5 | 7 | 0 |
|         | 59.14  | 640.8 | 5 | 6 | 8 | 0 | 433.3 | 5 | 5 | 7 | 0 |
|         | 59.15  | 640.7 | 5 | 6 | 8 | 0 | 433.3 | 5 | 5 | 7 | 0 |
|         | 59.16  | 645.7 | 5 | 6 | 9 | 0 | 438.2 | 5 | 5 | 8 | 1 |
|         | 59.17  | 640.6 | 5 | 6 | 8 | 0 | 433.1 | 5 | 5 | 7 | 0 |
|         | 59.18  | 640.5 | 5 | 6 | 8 | 0 | 433.1 | 5 | 5 | 7 | 0 |
|         | 59.20  | 641.2 | 5 | 6 | 8 | 0 | 438.7 | 5 | 5 | 8 | 1 |
| V59/2nd | 253.1  | 640.7 | 5 | 6 | 8 | 0 | 433.4 | 5 | 5 | 7 | 0 |
|         | 253.2  | 640.7 | 5 | 6 | 8 | 0 | 433.4 | 5 | 5 | 7 | 0 |
|         | 253.3  | 635.7 | 5 | 6 | 7 | 0 | 433.5 | 5 | 5 | 7 | 0 |
|         | 253.4  | 640.8 | 5 | 6 | 8 | 0 | 433.4 | 5 | 5 | 7 | 0 |
|         | 253.5  | 640.8 | 5 | 6 | 8 | 0 | 433.4 | 5 | 5 | 7 | 0 |
|         | 253.6  | 640.7 | 5 | 6 | 8 | 0 | 433.3 | 5 | 5 | 7 | 0 |
| V59/3rd | 352.1  | 640.6 | 5 | 6 | 8 | 0 | 438.2 | 5 | 5 | 8 | 1 |
|         | 352.2  | 640.6 | 5 | 6 | 8 | 0 | 438.3 | 5 | 5 | 8 | 1 |
|         | 352.3  | 640.6 | 5 | 6 | 8 | 0 | 433.2 | 5 | 5 | 7 | 0 |
|         | 352.4  | 640.6 | 5 | 6 | 8 | 0 | 438.2 | 5 | 5 | 8 | 1 |
|         | 352.5  | 640.7 | 5 | 6 | 8 | 0 | 433.3 | 5 | 5 | 7 | 0 |
|         | 352.6  | 640.6 | 5 | 6 | 8 | 0 | 433.1 | 5 | 5 | 7 | 0 |
|         | 352.7  | 640.5 | 5 | 6 | 8 | 0 | 438.2 | 5 | 5 | 8 | 1 |
|         | 352.8  | 640.6 | 5 | 6 | 8 | 0 | 433.3 | 5 | 5 | 7 | 0 |
|         | 352.9  | 640.7 | 5 | 6 | 8 | 0 | 433.4 | 5 | 5 | 7 | 0 |
|         | 352,10 | 640.7 | 5 | 6 | 8 | 0 | 438.2 | 5 | 5 | 8 | 1 |
|         | 352.11 | 640.6 | 5 | 6 | 8 | 0 | 433.2 | 5 | 5 | 7 | 0 |

|                      |             |       |   |   |    |   |       |   |   |   |   |
|----------------------|-------------|-------|---|---|----|---|-------|---|---|---|---|
|                      | 352.12      | 640.5 | 5 | 6 | 8  | 0 | 438.2 | 5 | 5 | 8 | 1 |
|                      | 352.13      | 640.6 | 5 | 6 | 8  | 0 | 438.1 | 5 | 5 | 8 | 1 |
|                      | 352.14      | 640.6 | 5 | 6 | 8  | 0 | 438.0 | 5 | 5 | 8 | 1 |
|                      | 352.15      | 641.0 | 5 | 6 | 8  | 0 | 433.6 | 5 | 5 | 7 | 0 |
|                      | 352.16      | 641.1 | 5 | 6 | 8  | 0 | 433.6 | 5 | 5 | 7 | 0 |
|                      | 352.17      | 641.1 | 5 | 6 | 8  | 0 | 433.6 | 5 | 5 | 7 | 0 |
|                      | 352.18      | 641.2 | 5 | 6 | 8  | 0 | 438.7 | 5 | 5 | 8 | 1 |
|                      | 352.19      | 641.2 | 5 | 6 | 8  | 0 | 433.6 | 5 | 5 | 7 | 0 |
|                      | 352,20      | 641.1 | 5 | 6 | 8  | 0 | 433.6 | 5 | 5 | 7 | 0 |
| V59/4th              | 438.1       | 645.8 | 5 | 6 | 9  | 1 | 438.4 | 5 | 5 | 8 | 1 |
|                      | 438.2       | 645.6 | 5 | 6 | 9  | 1 | 438.2 | 5 | 5 | 8 | 1 |
|                      | 438.3       | 645.6 | 5 | 6 | 9  | 1 | 438.3 | 5 | 5 | 8 | 1 |
|                      | 438.4       | 645.7 | 5 | 6 | 9  | 1 | 433.3 | 5 | 5 | 7 | 0 |
|                      | 438.5       | 645.6 | 5 | 6 | 9  | 1 | 438.3 | 5 | 5 | 8 | 1 |
|                      | 438.6       | 645.5 | 5 | 6 | 9  | 1 | 437.9 | 5 | 5 | 8 | 1 |
|                      |             |       |   |   |    |   |       |   |   |   |   |
| V138/1st             | 138.1       | 640.3 | 5 | 6 | 8  | 0 | 432.8 | 5 | 5 | 7 | 0 |
|                      | 138.2       | 640.5 | 5 | 6 | 8  | 0 | 433.0 | 5 | 5 | 7 | 0 |
|                      | 138.4       | 640.3 | 5 | 6 | 8  | 0 | 432.9 | 5 | 5 | 7 | 0 |
|                      | 138.5       | 640.4 | 5 | 6 | 8  | 0 | 437.8 | 5 | 5 | 8 | 1 |
|                      | 138.6       | 641.3 | 5 | 6 | 8  | 0 | 433.8 | 5 | 5 | 7 | 0 |
| V138/2 <sup>nd</sup> | 288.1       | 641.1 | 5 | 6 | 8  | 0 | 433.8 | 5 | 5 | 7 | 0 |
|                      | 288.2       | 641.1 | 5 | 6 | 8  | 0 | 433.7 | 5 | 5 | 7 | 0 |
|                      | 288.3       | 641.0 | 5 | 6 | 8  | 0 | 433.7 | 5 | 5 | 7 | 0 |
|                      | 288.4       | 645.3 | 5 | 6 | 9  | 1 | 433.7 | 5 | 5 | 7 | 0 |
|                      | 288.5       | 641.0 | 5 | 6 | 8  | 0 | 433.6 | 5 | 5 | 7 | 0 |
|                      | 288.6       | 640.9 | 5 | 6 | 8  | 0 | 433.6 | 5 | 5 | 7 | 0 |
|                      |             |       |   |   |    |   |       |   |   |   |   |
| V88/1st              | N88.1.<br>1 | 671.1 | 5 | 6 | 14 | 0 | 441.3 | 5 | 5 | 7 | 0 |
|                      | N88.1.      | 676.4 | 5 | 6 | 15 | 1 | 441.4 | 5 | 5 | 7 | 0 |

|         |         |       |   |   |     |   |       |   |   |    |   |
|---------|---------|-------|---|---|-----|---|-------|---|---|----|---|
|         | 2       |       |   |   |     |   |       |   |   |    |   |
|         | N88.1.3 | 671.2 | 5 | 6 | 14  | 0 | 441.5 | 5 | 5 | 7  | 0 |
|         | N88.1.4 | 671.1 | 5 | 6 | 14  | 0 | 441.4 | 5 | 5 | 7  | 0 |
|         | N88.1.5 | 681.2 | 5 | 6 | 16  | 0 | 441.4 | 5 | 5 | 7  | 0 |
|         | N88.1.6 | 671.1 | 5 | 6 | 14  | 0 | 441.3 | 5 | 5 | 7  | 0 |
|         | 88.1.7  | 671.6 | 5 | 6 | 14  | 0 | 441.4 | 5 | 5 | 7  | 0 |
|         | 88.1.8  | 671.7 | 5 | 6 | 14  | 0 | 441.5 | 5 | 5 | 7  | 0 |
|         | 88.1.9  | 671.8 | 5 | 6 | 14  | 0 | 441.4 | 5 | 5 | 7  | 0 |
|         | 88.1.10 | 676.6 | 5 | 6 | 15  | 1 | 441.3 | 5 | 5 | 7  | 0 |
|         | 88.1    | 671.2 | 5 | 6 | 14  | 0 | 441.0 | 5 | 5 | 7  | 0 |
|         | 88.2    | 671.2 | 5 | 6 | 14  | 0 | 441.0 | 5 | 5 | 7  | 0 |
|         | 88.3    | 671.3 | 5 | 6 | 14  | 0 | 441.0 | 5 | 5 | 7  | 0 |
|         | 88.4    | 671.3 | 5 | 6 | 14  | 0 | 441.0 | 5 | 5 | 7  | 0 |
|         | 88.5    | 671.1 | 5 | 6 | 14  | 0 | 440.9 | 5 | 5 | 7  | 0 |
|         | 88.6    | 671.1 | 5 | 6 | 14  | 0 | 441.0 | 5 | 5 | 7  | 0 |
|         | 88.8    | 671.1 | 5 | 6 | 14  | 0 | 440.7 | 5 | 5 | 7  | 0 |
| V88/2nd | N272.1  | 671.5 | 5 | 6 | 14* | 0 | 441.0 | 5 | 5 | 7* | 0 |
|         | N272.2  | 671.6 | 5 | 6 | 14  | 0 | 441.0 | 5 | 5 | 7  | 0 |
|         | N272.3  | 671.6 | 5 | 6 | 14  | 0 | 441.0 | 5 | 5 | 7  | 0 |
|         | N272.4  | 671.5 | 5 | 6 | 14  | 0 | 440.9 | 5 | 5 | 7  | 0 |
|         | N272.5  | 671.5 | 5 | 6 | 14  | 0 | 440.9 | 5 | 5 | 7  | 0 |
|         | N272.6  | 671.5 | 5 | 6 | 14  | 0 | 441.0 | 5 | 5 | 7  | 0 |
| V88/3rd | N369.1  | 665.9 | 5 | 6 | 13  | 0 | 446.3 | 5 | 5 | 8  | 1 |
|         | N369.2  | 665.9 | 5 | 6 | 13  | 0 | 446.4 | 5 | 5 | 8  | 1 |
|         | N369.3  | 661.1 | 5 | 6 | 12  | 1 | 441.4 | 5 | 5 | 7  | 0 |
|         | N369.3  | 660.8 | 5 | 6 | 12  | 1 | 441.3 | 5 | 5 | 7  | 0 |
|         | N369.5  | 665.9 | 5 | 6 | 13  | 0 | 446.4 | 5 | 5 | 8  | 1 |
|         | N369.6  | 665.9 | 5 | 6 | 13  | 0 | 446.3 | 5 | 5 | 8  | 1 |

|         |        |       |   |   |     |   |       |   |   |    |   |
|---------|--------|-------|---|---|-----|---|-------|---|---|----|---|
|         | 369.7  | 661.2 | 5 | 6 | 12  | 1 | 441.1 | 5 | 5 | 7  | 0 |
|         | 369.8  | 666.2 | 5 | 6 | 13  | 0 | 446.2 | 5 | 5 | 8  | 1 |
|         | 369.9  | 661.2 | 5 | 6 | 12  | 0 | 441.2 | 5 | 5 | 7  | 0 |
|         | 369,10 | 666.4 | 5 | 6 | 13  | 0 | 446.2 | 5 | 5 | 8  | 1 |
|         | 369.11 | 666.2 | 5 | 6 | 13  | 0 | 446.1 | 5 | 5 | 8  | 1 |
|         | 369.12 | 671.3 | 5 | 6 | 14  | 0 | 446.1 | 5 | 5 | 8  | 1 |
|         | 369.14 | 666.2 | 5 | 6 | 13  | 0 | 446.1 | 5 | 5 | 8  | 1 |
|         | 369.15 | 661.1 | 5 | 6 | 12  | 1 | 440.9 | 5 | 5 | 7  | 0 |
|         | 369.16 | 666.5 | 5 | 6 | 13  | 0 | 446.5 | 5 | 5 | 8  | 1 |
|         | 369.17 | 681.9 | 5 | 6 | 16  | 0 | 446.6 | 5 | 5 | 8  | 1 |
|         | 369.18 | 661.6 | 5 | 6 | 12  | 1 | 441.5 | 5 | 5 | 7  | 0 |
|         | 369.19 | 661.5 | 5 | 6 | 12  | 1 | 441.6 | 5 | 5 | 7  | 0 |
|         | 369,20 | 661.4 | 5 | 6 | 12  | 1 | 441.5 | 5 | 5 | 7  | 0 |
| V88/4th | N449.1 | 681.2 | 5 | 6 | 16  | 0 | 440.4 | 5 | 5 | 7  | 0 |
|         | 449.2  | 676.4 | 5 | 6 | 15  | 1 | 440.4 | 5 | 5 | 7  | 0 |
|         | 449.3  | 676.6 | 5 | 6 | 15  | 1 | 440.5 | 5 | 5 | 7  | 0 |
|         | 449.4  | 676.4 | 5 | 6 | 15  | 1 | 440.5 | 5 | 5 | 7  | 0 |
|         | 449.5  | 671.3 | 5 | 6 | 14* | 0 | 440.7 | 5 | 5 | 7* | 0 |
|         | 449.6  | 676.5 | 5 | 6 | 15  | 1 | 440.6 | 5 | 5 | 7  | 0 |
|         |        |       |   |   |     |   |       |   |   |    |   |
| V43/2nd | 241.1  | 651.3 | 5 | 6 | 10  | 0 | 438.9 | 5 | 5 | 8  | 1 |
|         | 241.2  | 651.3 | 5 | 6 | 10  | 0 | 438.9 | 5 | 5 | 8  | 1 |
| V43/3rd | 349.1  | 646.1 | 5 | 6 | 9   | 1 | 443.9 | 5 | 5 | 9  | 0 |
|         | 349.2  | 646.1 | 5 | 6 | 9   | 1 | 444.0 | 5 | 5 | 9  | 0 |
|         | 349.3  | 646.4 | 5 | 6 | 9   | 1 | 444.0 | 5 | 5 | 9  | 0 |
|         | 349.4  | 646.4 | 5 | 6 | 9   | 1 | 444.1 | 5 | 5 | 9  | 0 |
|         | 349.5  | 646.3 | 5 | 6 | 9   | 1 | 444.0 | 5 | 5 | 9  | 0 |
|         | 349.6  | 646.3 | 5 | 6 | 9   | 1 | 444.0 | 5 | 5 | 9  | 0 |

<sup>1</sup>Fragments sizes were determined using a GS500LIZ size standard. <sup>2</sup>Opa genes contain short C and A tracts adjacent to the 5'CTCTT repeat tract, these short tracts are invariant within a given strains as detected in all Sanger sequences of PCR products spanning the Opa repeats and in whole genome sequence data. <sup>3</sup>Asterisks indicate repeat numbers

confirmed by dideoxy Sanger sequencing of PCR products. <sup>4</sup>Expression states, 1=1, 0=0 (all genes are subject to translational phase variation).
